# Supplementary material for: Tailoring polyester-based diblock copolymers for boron-enhanced drug delivery: synthesis, kinetics, and nanoparticle characterization
Source: Royal Society of Chemistry journal article supplement (doi:10.1039/d4py01363h), 2025-01-01
Supplement: d4py01363h1.pdf [file d4py01363h1.pdf]

SUPPORTING INFORMATION

Tailoring Polyester Based-Diblock Copolymers for Boron-Enhanced Drug  
Delivery: Synthesis, Kinetics, and Nanoparticle Characterization

*Robert Mundil*<sup>†,\*</sup>, *Pavlna Marková*<sup>†</sup>, *Martin Orságh*<sup>†</sup>, *Ewa Pavlova*<sup>§</sup>, *Zuzana Walterová*<sup>§</sup>,  
*Petr Toman*<sup>§</sup>, *Olga Kočková*<sup>§</sup>, and *Mariusz Uchman*<sup>†,\*</sup>

<sup>†</sup> Department of Physical and Macromolecular Chemistry, Faculty of Science, Charles  
University, Hlavova, 2030, 128 40 Prague 2, Czech Republic

<sup>§</sup> Institute of Macromolecular Chemistry, Academy of Sciences of the Czech Republic,  
Heyrovského nám. 2, 162 06 Prague 6, Czech Republic

## EXPERIMENTAL SECTION AND METHODS

### General Considerations and Materials

All operations were performed under dry nitrogen using vacuum/inert manifold and standard Schlenk techniques. Toluene (Acros Organics, 99.85%, Extra dry over molecular sieve) and benzyl alcohol (Acros Organics, 98+%, Extra dry) were used as received. Acetonitrile (Lach-Ner, G.R.) was dried over  $\text{CaH}_2$  and distilled prior to use. 1,5,7-triazobicyclo[4.4.0]dec-5-ene (TBD) (Aldrich, 98%) was transferred to the Schlenk flask, stored under nitrogen, and used as received. Tin (II) 2-ethylhexanoate (stannous octoate,  $\text{SnOct}_2$ ) (Sigma-Aldrich, 92.5-100%), 2,2-dimethoxy-2-phenylacetophenone (DMPA) (Sigma-Aldrich, 99%) and 1-thioglycerol ( $\alpha$ -TG) (Sigma-Aldrich,  $\geq 97\%$ ) were used as received. Poly(ethylene glycol) methyl ether (mPEG) (Aldrich, average  $M_n$  5000) was dissolved in dry toluene at an elevated temperature (40 °C) and dried two times via azeotropic distillation just before use.  $\epsilon$ -Caprolactone ( $\epsilon$ -CL) (Sigma-Aldrich, 97%) was dried over  $\text{CaH}_2$ , distilled and stored in a fridge under nitrogen over molecular sieves. COSAN-dioxanate (Katchem Ltd., Czech Republic) and 3-pyridineboronic acid 1,3-propanediol ester (Sigma-Aldrich, 99%) were used as received. 3/7-(prop-2-ynyl)oxepan-2-one (PgCL) was synthesized according to the literature procedure.<sup>1</sup> In the case of kinetic experiments, the resulting mixture of both isomers (30% of 3-(prop-2-ynyl)oxepan-2-one) was separated by silica gel column chromatography using cyclohexane/ethyl acetate mixture of ratio 8/2 as the mobile phase. Spectra/Por 1 RC Dialysis Membrane Tubing (Spectrum Chemical Mfg. Corp., nominal molecular weight cut-off (MWCO) 3.5 and 6-8 kDa) was cut to approximately 15 cm long pieces. These were placed into a beaker filled with regular sink water and heated to 60 °C while stirring on a magnetic stirrer for 30 minutes. The softened tubing was thoroughly rinsed with deionized water and stored in a dilute sodium azide solution.

**Synthesis of diblock copolymers mPEG-*b*-P( $\epsilon$ -CL-*co*-PgCL).** In a standard procedure,  $\epsilon$ -CL (33, 79 and 210 eq.) and PgCL (11, 26 and 70 eq.) were added to mPEG (1 eq.) in a 50 ml Schlenk flask equipped with a magnetic stir bar. The mixture was dissolved in dry toluene, carefully dried twice by azeotropic distillation and finally dissolved in 3 ml of dry toluene. Once heated to 110 °C, the reaction was initiated by SnOct<sub>2</sub> (0.5 eq.). After three hours, the polymerization was terminated by benzoic acid in toluene. The crude polymer was precipitated with cold diethyl ether, filtered off, and dried *in vacuo* until constant weight.

**UV-initiated thiol-yne click reaction.** In a typical click reaction, mPEG-*b*-P( $\epsilon$ -CL-*co*-PgCL) was introduced to a 50 ml Schlenk flask equipped with a magnetic stir bar. The propargylated diblock copolymer was dissolved in dry toluene and dried twice by azeotropic distillation. The diblock copolymer was finally dissolved in tetrahydrofuran (1 ml per 50 mg) at 25 °C (room temperature). DMPA (0.5 eq. to propargyl groups) and 1-thioglycerol (15 eq. to propargyl groups) were added, the final solution was purged with nitrogen for 15 minutes and irradiated for the allotted time at either 20 or 30 cm distance from UVAHAND 250 (Honle UV Technology) UV lamp. The crude reaction mixture was transferred into a dialysis membrane and dialyzed against deionized water. The desired product was subsequently isolated by lyophilization.

**Kinetic investigation of  $\epsilon$ -CL and 7-(prop-2-ynyl)oxepan-2-one copolymerization catalyzed by benzyl alcohol/1,5,7-triazobicyclo[4.4.0]dec-5-ene.** In a typical kinetic experiment,  $\epsilon$ -CL (0.10 g, 0.9 mmol, 12.5 eq.), 7-(prop-2-ynyl)oxepan-2-one (0.14 g, 0.9 mmol, 12.5 eq.) and solution of benzyl alcohol (7.5  $\mu$ l, 0.07 mmol, 1 eq.) in toluene were introduced to the flame-dried Schlenk flask equipped with a magnetic stirring bar. Monomers and benzyl alcohol were dried via azeotropic distillation, and finally dissolved in the desired volume of toluene (5.3 ml). Then, an aliquot of the reaction mixture was transferred to the capped reaction vial designed for microwave

synthesis (Biotage). These vials were heated, sealed, allowed to cool down under vacuum, and filled with nitrogen prior to use. The calculated amount of catalyst, 1,5,7-triazobicyclo[4.4.0]dec-5-ene, (20.1 mg, 0.14 mmol, 2.0 eq.) was dissolved in dry toluene, and (co)polymerization was started by the addition of catalyst solution to the reaction vial. The reaction mixture was magnetically stirred at the controlled reaction temperature (30 °C) for an allotted polymerization time. Polymerization was quenched with a solution of benzoic acid in toluene and then a sample was taken for <sup>1</sup>H NMR analysis (monomer conversion determination). Toluene was evaporated via a rotary evaporator, the crude polymer was precipitated with hexane, extracted with cyclohexane/ethyl acetate, and dried *in vacuo* until constant weight.

**Synthesis of COSAN-pyridinium-3-boronic acid conjugate (CosBA).** COSAN-dioxanate

(0.1 g, 0.24 mmol) and 3-pyridineboronic acid 1,3-propanediol ester (0.044 g, 0.27 mmol, 1.1 eq.) were weighted into the round-bottom flask, purged with nitrogen and finally dissolved in 3 ml of dried acetonitrile. Reaction mixture was stirred at 70 °C for 4 hours, followed

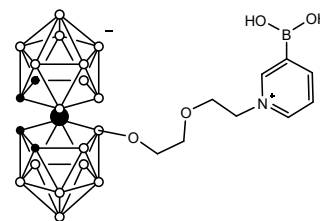

by evaporation of acetonitrile on a rotary evaporator, providing the red oil. The red oily product was dissolved in 1 ml of acetone and evaporation resulted in the formation of orange foamy solid (97% yield). 1,3-propanediol protected COSAN-dioxanate-pyridinium-3-boronic acid in the form of orange solid was deprotected in the second step. The isolated protected compound was dissolved in acetone (5 ml), followed by the addition of 5 ml of 6% aqueous HCl. Water (5 ml) was added after 24 hours, and acetone was evaporated on the rotary evaporator. Residual water was removed by decantation and the whole procedure was repeated again. Resulting oily product was washed with water and dried *in vacuo* until constant weight (90% yield).

**<sup>1</sup>H NMR** (400MHz, acetone-*d*<sub>6</sub>) δ 9.32 (dt, *J* = 6.2, 1.5 Hz, 1H, pyr CH), 9.24 (d, *J* = 1.6 Hz, 1H, pyr CH), 8.98 (dt, *J* = 7.7, 1.4 Hz, 1H, pyr CH), 8.28 - 8.11 (m, 1H, pyr CH), 5.09 - 4.92 (m, 2H, pyrN-CH<sub>2</sub>), 4.21 - 4.06 (m, 4H, CH-COSAN + OCH<sub>2</sub>), 4.02 (s, 2H, CH-COSAN), 4.5 - 0.5 (m, 17H, BH), 3.63 (s, 4H, OCH<sub>2</sub>CH<sub>2</sub>OB). **MS** (MALDI-TOF, *m/z*): Calculated for C<sub>13</sub>H<sub>35</sub>B<sub>19</sub>CoNO<sub>4</sub>Na (M+Na<sup>+</sup>): 557.367, found: 557.230.

**Preparation of nanoparticles.** Polymer (10 mg) was dissolved overnight in 2 ml of THF/water (9/1, v/v) mixture and added dropwise into 4 ml of vigorously stirred water. (The same procedure but with addition of 2 mg of CosBA was used for drug encapsulation experiments.) THF was used as a nonselective solvent (good solvent for both blocks, in which polymer chains dissolve molecularly) and water as a selective solvent (a good solvent for PEG and simultaneously a poor solvent for P(ε-CL-*co*-PgCL), in which polymer chains spontaneously and reversibly form multimolecular micelles). Decreasing the content of initial common solvent by dropwise addition of the solution into an excess of water induced micelle formation and the remaining organic solvent was eliminated by dialysis. It was dialyzed against deionized water for 1 day and the dialysis fluid was exchanged at least 3 times. The aqueous solution was then filtered with 0.45 μm polyvinylidene difluoride (PVDF) membrane syringe filter and further diluted with deionized water to prepare 1 ml samples of different concentrations (0.2-1 g·ml<sup>-1</sup>). Weeks later, no aggregation or precipitation was visible to the naked eye, suggesting high nanoparticle stability.

## Methods

**Size exclusion chromatography (SEC).** SEC analysis was performed using a Deltachrom SDS 030 pump (Watrex Ltd., Prague, Czech Republic) at a flow rate of 0.5 ml·min<sup>-1</sup> and a MIDAS autosampler (Spark Ltd., Emmen, Holland). Two PLgel 10-μm mixed B LS columns (Polymer Laboratories, Shropshire, UK) were used in a series, each of which separating in the molecular

weight range of approximately  $5 \times 10^2 \leq M \leq 1 \times 10^7$  (related to PS standards), according to the manufacturer's instructions. The following detectors were used: (i) a UV/VIS DeltaChrom UVD 200 detector (Watrex) at a flow cell volume of 8  $\mu$ l and operating at a wavelength  $\lambda=264$  nm, and (ii) an evaporative light-scattering photometer PL ELS 1000 (Polymer Laboratories) with nitrogen as a carrier gas, setting the temperatures of the nebulizer and evaporator to 100 °C and 180 °C, respectively. Tetrahydrofuran was used as the mobile phase at room temperature.  $M_w$  and  $M_n$  were determined by constructing a calibration curve with polystyrene standards with molecular weights ranging from 666 to  $2 \times 10^6$ . Data were collected into Clarity software (DataApex Ltd.).

**Proton Nuclear Magnetic Resonance Spectroscopy.**  $^1\text{H}$  NMR spectra were recorded on a Bruker Avance MSL 400 MHz spectrometer at room temperature in  $\text{CDCl}_3$  or in acetone- $d_6$ . Approximately 5 mg of sample was directly dissolved into the NMR tube in 0.6 ml of NMR solvent. The chemical shifts were calibrated using the residual resonances of the solvent. Diffusion-ordered NMR spectroscopy (DOSY) and CosBA binding  $^1\text{H}$  NMR experiments were performed using a Bruker Avance III 600MHz spectrometer equipped with a cryogenically cooled probe. For a CosBA binding experiments, 10 mg of polymer and 2 mg of CosBA (0.7 eq. respective to the diol containing  $\epsilon$ -CL units) were dissolved in 0.6 ml of dry acetonitrile- $d_3$  with a drop of pyridine (20 eq. respective to the CosBA).

**Light scattering.** The light scattering measurements were performed on a photometer (ALV, Germany) consisting of a CGS-3 automatic goniometer, a 7004 multitaumultibit autocorrelator, two high-QE APD pseudo cross-correlation detectors, and a 100 mW, 660 nm diode-pumped solid-state laser (Cobolt AB, Sweden). The photometer was operated using the ALV-Correlator software. Individual measurements were performed at different concentrations (0.2-1.0  $\text{g}\cdot\text{ml}^{-1}$ ) and at 26 °C for 20 s, with scattering angles ranging from 50° to 150° and with an angular step of 10°.

Considering the probability distribution, each angle was measured three times, and only the averaged intensity values were used for further calculations. Both static light scattering (SLS) and dynamic light scattering (DLS) data were analyzed using ALV-Stat software.

The molar mass was calculated from angular averaged intensity values as:  $(Kc/R(q,c))=1/M_w$ , where  $M_w$ , stand for weight-averaged molar mass and  $R(q,c)$  stands for the corrected Rayleigh ratio which depends on the polymer concentration  $c$  and on the magnitude of the scattering vector  $q = (4\pi n/\lambda_0) \sin (\theta/2)$ , where  $\theta$  is the scattering angle,  $n$  is the refractive index of the solvent and  $\lambda_0$  is the wavelength of the incident light. The contrast factor  $K$  is given by the relationship  $K = 4\pi^2 n^2 (dn/dc)^2 / (\lambda_0^4 N_A)$ , where  $(dn/dc)$  is the refractive index increment of the polymer with respect to the solvent, and  $N_A$  is the Avogadro constant. The refractive index increments of **2b2** in THF was measured by the Optilab T-rEX refractive index detector (Wyatt Technology Corporation). First, the reference cuvette of the detector was purged with approximately 10 ml of THF. Then, pure solvent and 10 ml samples of increasing concentrations (up to 2.5 g·l<sup>-1</sup>) were consecutively injected into the detector with a plastic syringe by a mechanical pump (flow rate 1 ml·min<sup>-1</sup>) through 1 μm PTFE membrane syringe filter. The relative refractive index was plotted against time, and the change of the relative refractive index was determined by difference in heights between the plateaus corresponding to individual sample concentrations. The refractive index increment in THF was obtained by a linear fit of these changes plotted against the sample concentration. From these values, the refractive index increments of **2b2** in water were estimated using the Gladstone-Dale equation,<sup>2</sup> assuming the specific volume of the respective polymers is 1 ml·g<sup>-1</sup> in both solvents:  $v(n_0 - 1) = v_1 w_1 (n_1 - 1) + v_2 w_2 (n_2 - 1)$ , where  $v_i$  represents the specific volume,  $w_i$  is the weight fraction and  $n_i$  stands for the refractive index.

Dynamic light scattering (DLS) measurements were evaluated by fitting the measured normalized time autocorrelation function of the scattered light intensity,  $g^{(2)}(t, q)$ , related to the electric field autocorrelation function,  $g^{(1)}(t, q)$ , by the Siegert relation,  $g^{(2)}(t, q) = 1 + \beta |g^{(1)}(t, q)|^2$ . The data were fitted using the constrained regularization algorithm (CONTIN), which provides the distribution of relaxation times  $\tau$ ,  $A(\tau, q)$  as the inverse Laplace transform of  $g^{(1)}(t, q)$  function. The  $A(\tau, q)$  distributions can be recalculated to the distributions of apparent hydrodynamic radii,  $R_h$ , using the relationship  $R_h = k_B T q^2 \tau / 6 \pi \eta$ , where  $k_B$  is the Boltzmann constant,  $T$  is the temperature, and  $\eta$  is the viscosity of the solvent.

**Transmission electron microscopy.** Transmission electron microscopy (TEM) micrographs were acquired under a JEOL NEOARM transmission electron microscope operating at an acceleration voltage of 200 kV and equipped with a TemCamXF416R 4k  $\times$  4k CMOS camera (TVIPS, Germany). Approximately 100  $\mu$ l of aqueous nanoparticle dispersion (**2b2**, 11.2 g $\cdot$ l $^{-1}$ ) was applied to a copper TEM grid coated with an electron-transparent carbon film. After 1 min, the solution was removed by touching the bottom of the TEM grid with filter paper and the grid was dried prior to insertion into the microscope holder. Samples were negatively stained with the uranyl acetate. Obtained images were analyzed using ImageJ software to assess the particle size.

**Cryogenic TEM.** Cryo-TEM micrographs of synthesized nanoparticles were obtained with a TEM microscope Tecnai G2 Spirit Twin 12 (FEI, Czech Republic) using the bright field imaging mode at the accelerating voltage 120 kV. 3  $\mu$ l of the sample **2b2** solution (11.2 g $\cdot$ l $^{-1}$ ) was applied to an electron microscopy grid covered with a holey carbon supporting film (Electron Microscopy Science), which was hydrophilized just before the experiment via glow discharge (Expanded Plasma Cleaner, Harrick Plasma, USA). The excess of the solution was removed by blotting (Whatman no. 1 filter paper) for  $\sim$ 1 s, and the grid was immediately plunged into liquid ethane



held at -181 °C. The frozen sample was then transferred into the microscope and observed at -173 °C. Recorded images were processed via ImageJ software to determine the size of particles.

**Quantum chemical calculations.** The ground state molecular geometries of the reactants, intermediates, and products of the TBD-catalyzed ring-opening polymerization (ROP) (Scheme 1) were determined by means of the minimization of the total energy calculated using the hybrid Density Functional Theory (DFT) method B3LYP<sup>3-4</sup> and the Pople basis set 6-311G(d). This method was previously successfully used for an extensive theoretical and experimental study of similar reactions by Nifant'ev et al.<sup>5</sup> Solvation effects (toluene solution) were described by means of the polarizable continuum model (PCM) using the integral equation formalism variant.<sup>6-7</sup> For each reactant, different initial geometries were considered to find the lowest-energy conformer. Each obtained equilibrium geometry was checked by the normal mode analysis showing no imaginary frequency. The transition states on the TBD-catalyzed ROP reaction path were found using the Berny algorithm with an initial guess obtained from the relaxed potential energy surface scans along the appropriate internal coordinates. All obtained transition states were confirmed by the normal mode analysis showing just one imaginary frequency and intrinsic reaction coordinate (IRC) calculations performed on both sides of the transition state. IRC calculations were followed by the geometry optimizations, which proved that reaction proceeds from the given transition state to the expected reaction intermediate. Thermodynamic parameters were calculated for the room temperature 298.15 K and pressure 1 atm. All calculations were performed using the Gaussian 16 program package.<sup>8</sup>

## Thiol-yne click functionalization of mPEG-*b*-P( $\epsilon$ -CL-*co*-PgCL)

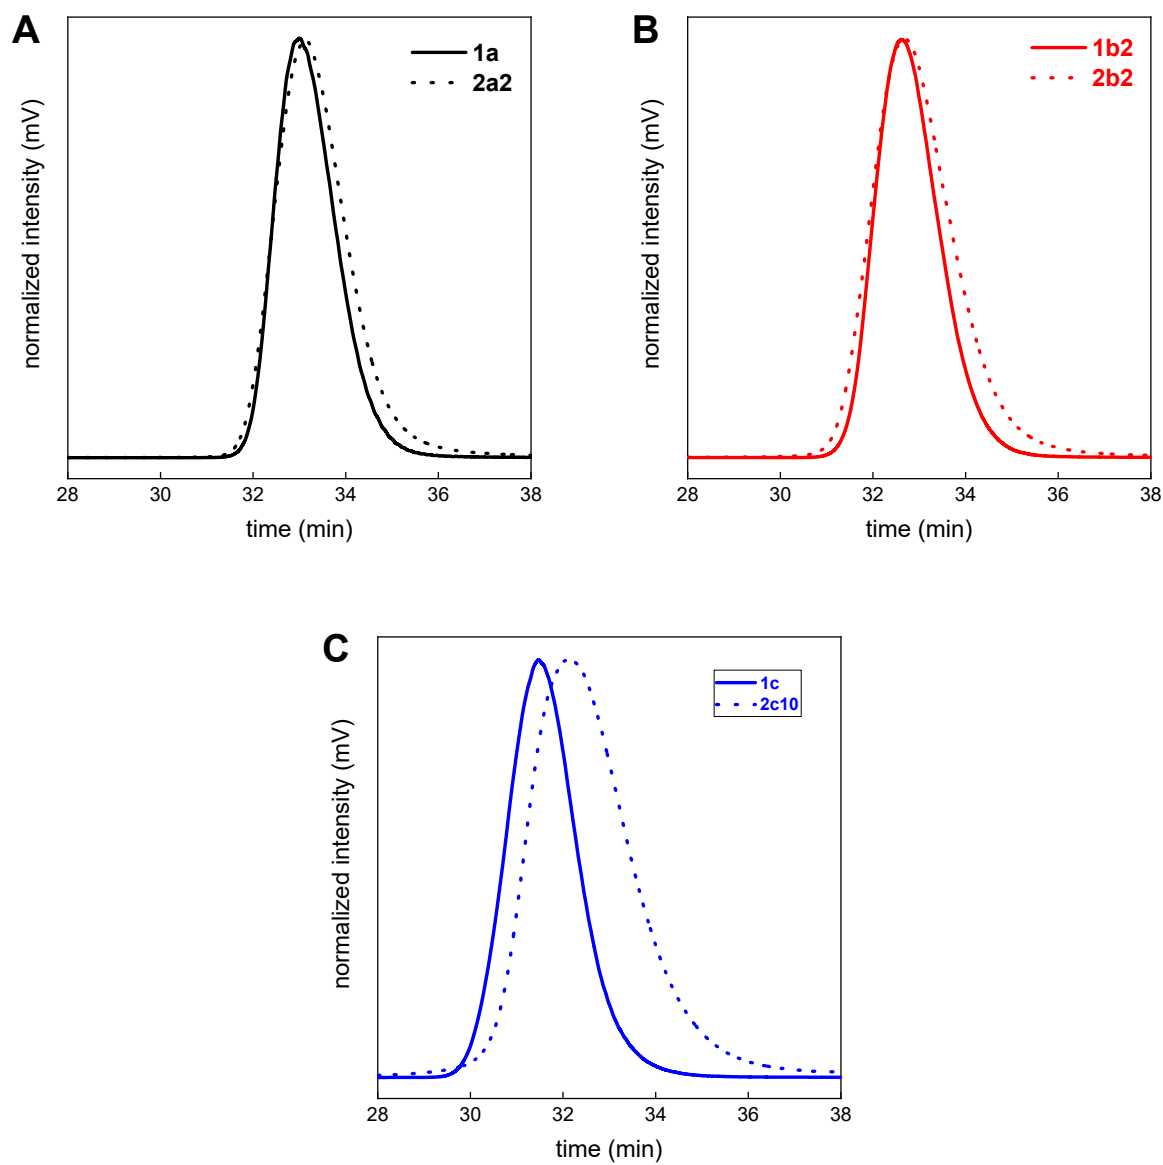

**Figure S1:** SEC-ELS chromatograms showing direct comparison between mPEG-*b*-P( $\epsilon$ -CL-*co*-PgCL) copolymers and their corresponding analogs modified via thiol-yne click reaction

## Kinetics and modeling of $\epsilon$ -CL and 7-(prop-2-ynyl)oxepan-2-one copolymerization

**Table S1:** Copolymerization of  $\epsilon$ -CL and 7-(prop-2-ynyl)oxepan-2-one in toluene catalyzed by BnOH/TBD at 30 °C<sup>a</sup>

| time (h) | conv. $\epsilon$ -CL <sup>b</sup> (%) | conv. 7-is. <sup>b</sup> (%) | $M_n^c$ (kg.mol <sup>-1</sup> ) | $\mathcal{D}^{RI\ c}$ | $M_n^d$ (kg.mol <sup>-1</sup> ) |
|----------|---------------------------------------|------------------------------|---------------------------------|-----------------------|---------------------------------|
| 1        | 12.2                                  | 28.6                         |                                 |                       | 0.8                             |
| 2        | 22.0                                  | 49.3                         | 1.3                             | 1.15                  | 1.4                             |
| 3        | 32.0                                  | 65.4                         | 1.5                             | 1.20                  | 1.9                             |
| 4        | 41.6                                  | 78.1                         | 1.8                             | 1.15                  | 2.3                             |
| 5        | 50.0                                  | 86.2                         | 2.1                             | 1.18                  | 2.6                             |

<sup>a</sup>  $n_{\text{BnOH}} = 10.5 \mu\text{mol}$  (1 eq.),  $\epsilon\text{-CL}/7\text{-is}/\text{BnOH}/\text{TBD} = 12.5/12.5/1/2$ ,  $c_M = 0.27\text{M}$ ; <sup>b</sup> determined by  $^1\text{H}$  NMR; <sup>c</sup> apparent number-average molecular weights ( $M_n$ ) and dispersities ( $\mathcal{D}$ ) determined by SEC-ELS with PS calibration in THF at 25 °C; <sup>d</sup>  $M_n$

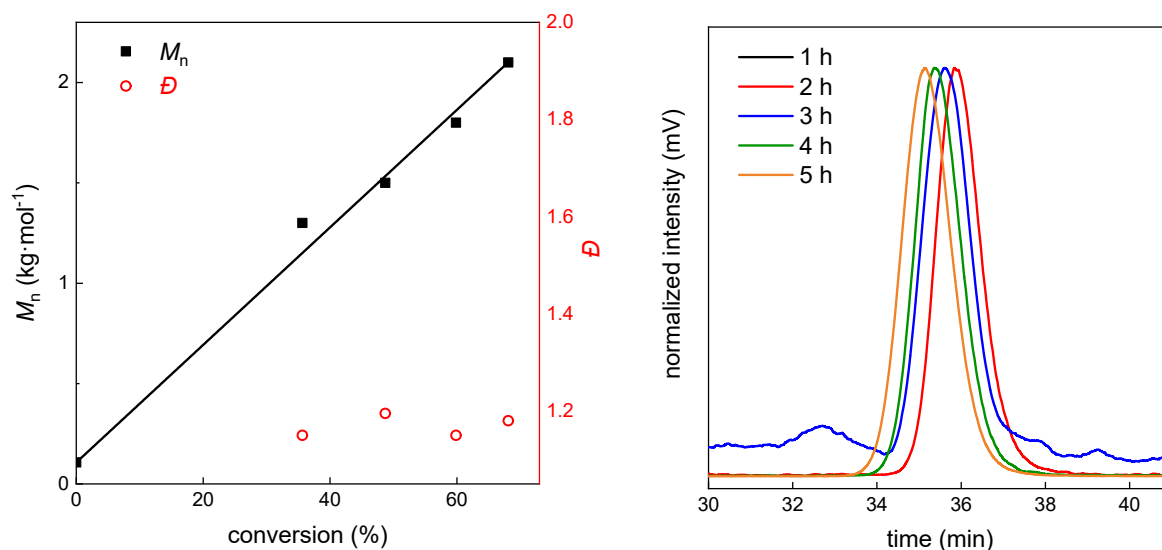

**Figure S2:** Kinetics of copolymerization of  $\epsilon$ -CL with 7-(prop-2-ynyl)oxepan-2-one in toluene catalyzed by BnOH/TBD at 30 °C: The apparent number-average molecular weights ( $M_n$ ) and dispersities ( $\mathcal{D}$ ) determined by SEC-ELS with PS calibration plotted vs. monomer conversion (left). Corresponding SEC-ELS chromatograms (right).

Copolymerization parameters

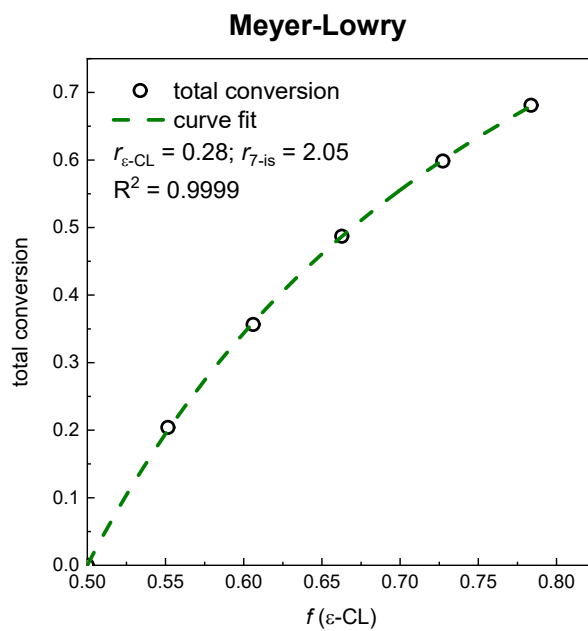

**Figure S3:** The Meyer-Lowry evaluation of the  $\epsilon\text{-CL}$  and 7-(prop-2-ynyl)oxepan-2-one copolymerization in toluene catalyzed by BnOH/TBD at 30 °C.

**Table S2:** Data obtained from determined copolymerization parameters (integrated Ideal Model) and used for construction of simulated copolymer composition profiles

| $f(\varepsilon\text{-CL})$ | total conversion <sup>a</sup> | $F(\varepsilon\text{-CL})$ <sup>b</sup> | $f(\varepsilon\text{-CL})$ | total conversion <sup>a</sup> | $F(\varepsilon\text{-CL})$ <sup>b</sup> |
|----------------------------|-------------------------------|-----------------------------------------|----------------------------|-------------------------------|-----------------------------------------|
| 0.500                      | 0.000                         | 0.264                                   | 0.775                      | 0.677                         | 0.552                                   |
| 0.525                      | 0.099                         | 0.284                                   | 0.800                      | 0.712                         | 0.589                                   |
| 0.550                      | 0.187                         | 0.305                                   | 0.825                      | 0.745                         | 0.628                                   |
| 0.575                      | 0.266                         | 0.327                                   | 0.850                      | 0.777                         | 0.670                                   |
| 0.600                      | 0.336                         | 0.350                                   | 0.875                      | 0.807                         | 0.715                                   |
| 0.625                      | 0.399                         | 0.374                                   | 0.900                      | 0.837                         | 0.763                                   |
| 0.650                      | 0.456                         | 0.400                                   | 0.925                      | 0.867                         | 0.816                                   |
| 0.675                      | 0.508                         | 0.427                                   | 0.950                      | 0.898                         | 0.872                                   |
| 0.700                      | 0.555                         | 0.455                                   | 0.975                      | 0.934                         | 0.933                                   |
| 0.725                      | 0.599                         | 0.486                                   | 1.000                      | 1.000                         | 1.000                                   |
| 0.750                      | 0.639                         | 0.518                                   |                            |                               |                                         |

$${}^a \text{total conversion} = 1 - \left(\frac{f}{f_0}\right)^{\frac{1}{r-1}} \cdot \left(\frac{1-f}{1-f_0}\right)^{\frac{r}{1-r}}, (f_0 = 0.5)^9$$

$${}^b F = \frac{rf}{rf - f + 1}$$

## Quantum chemical validation of kinetics and copolymer structure

**Table S3:** Gibbs free energies (in kcal·mol<sup>-1</sup>) of reaction intermediates and transition states for the TBD-catalyzed ROP calculated by the PCM-B3LYP/6-311G(d) method. For each isomer, the highest-energy transition state is shown in bold. All values are with respect to the Gibbs free energy of the ground state of the system, i.e. complex BnOH-TBD.

### a) Initial step of the polymerization

|                | I1   | TS12         | I2    | TS23  | I3    | TSr          | I3r   | TSr2  | I3r2  | TS34         | I4   | I5    |
|----------------|------|--------------|-------|-------|-------|--------------|-------|-------|-------|--------------|------|-------|
| <i>Vacuum</i>  |      |              |       |       |       |              |       |       |       |              |      |       |
| $\epsilon$ -CL | 2.47 | <b>21.46</b> | 16.11 | 18.35 | 16.40 | 18.73        | 14.72 | 16.82 | 14.92 | 21.07        | 4.17 | -1.54 |
| 3-is *         | 2.39 | <b>23.02</b> | 20.01 | 21.58 | 19.05 | 20.54        | 14.95 | 16.70 | 15.45 | 20.61        | 5.41 | 1.21  |
| 7-is *         | 2.54 | 21.23        | 15.83 | 18.44 | 16.68 | 20.44        | 15.56 | –     | –     | <b>21.33</b> | 4.04 | 0.13  |
| <i>Toluene</i> |      |              |       |       |       |              |       |       |       |              |      |       |
| $\epsilon$ -CL | 4.64 | 22.33        | 19.00 | 20.75 | 19.30 | 21.47        | 17.63 | 19.61 | 18.32 | <b>22.60</b> | 7.47 | 1.21  |
| 3-is *         | 4.79 | <b>26.57</b> | 22.65 | 23.95 | 21.67 | 23.27        | 18.09 | 19.16 | 18.21 | 22.24        | 8.03 | 2.88  |
| 7-is *         | 5.05 | 21.58        | 18.30 | 21.13 | 18.75 | <b>22.70</b> | 17.93 | –     | –     | 21.95        | 6.67 | 1.40  |

### b) Next step of the polymerization (calculated only in toluene solution)

| Addition of another unit | to the chain end | I1             | TS12         | I2    | TS2r  | I2r   | TS23         | I3    | TSr   | I3r   | TSr2  | I3r2  | TS34  | I4    | I5    |
|--------------------------|------------------|----------------|--------------|-------|-------|-------|--------------|-------|-------|-------|-------|-------|-------|-------|-------|
|                          |                  | <i>Toluene</i> |              |       |       |       |              |       |       |       |       |       |       |       |       |
| $\epsilon$ -CL           | $\epsilon$ -CL   | 6.66           | <b>24.87</b> | 20.30 | 21.86 | 19.78 | 23.75        | 21.87 | 22.37 | 18.41 | –     | –     | 23.16 | 6.82  | 2.65  |
| $\epsilon$ -CL           | 3-is             | 8.42           | <b>25.71</b> | 23.27 | 24.59 | 22.38 | 23.15        | 21.81 | 23.48 | 20.37 | 22.72 | 20.04 | 25.22 | 7.00  | 3.64  |
| $\epsilon$ -CL           | 7-is             | 7.50           | <b>26.30</b> | 22.30 | –     | –     | 24.49        | 22.01 | 24.44 | 21.08 | 22.48 | 20.50 | 24.05 | 9.00  | 2.80  |
| 3-is                     | $\epsilon$ -CL   | 6.36           | <b>25.87</b> | 24.78 | –     | –     | 25.24        | 18.28 | 19.82 | 18.47 | –     | –     | 22.30 | 8.48  | 3.77  |
| 3-is                     | 3-is *           | 8.68           | <b>27.68</b> | 25.82 | –     | –     | 26.82        | 20.48 | 21.83 | 20.37 | –     | –     | 23.18 | 10.19 | 5.60  |
| 3-is                     | 7-is *           | 8.44           | 28.37        | 26.96 | –     | –     | <b>29.70</b> | 27.43 | 27.69 | 20.85 | 22.30 | 20.99 | 24.04 | 10.48 | 4.68  |
| 7-is                     | $\epsilon$ -CL   | 6.77           | <b>24.16</b> | 19.25 | 21.84 | 18.63 | 21.65        | 19.63 | 21.75 | 18.32 | –     | –     | 22.66 | 5.44  | -0.03 |
| 7-is                     | 3-is *           | 8.36           | <b>25.44</b> | 21.48 | –     | –     | 23.08        | 20.70 | 23.41 | 22.98 | –     | –     | 24.41 | 6.92  | 3.93  |
| 7-is                     | 7-is *           | 7.40           | <b>25.96</b> | 23.05 | –     | –     | 24.13        | 22.41 | 24.37 | 22.42 | 23.65 | 21.18 | 23.77 | 9.12  | 4.22  |

\*) Data for 3- and 7-isomer polymerization are taken from our previous paper<sup>10</sup>

**Table S4: Thermodynamic data**

**a) Initial step of the  $\epsilon$ -CL polymerization**

Optimized molecular conformations (in vacuum) and thermodynamic parameters (electronic energies (with the nuclear repulsion)  $E_{\text{DFT}}$ , sum of electronic and zero-point energies  $E_0$ , sum of electronic and thermal energies  $E_{298}$ , sum of electronic and thermal enthalpies  $H_{298}$ , and sum of electronic and thermal free energies  $G_{298}$ ) in vacuum and toluene solution calculated by the PCM-B3LYP/6-311G(d) method

| State                       | BnOH-TBD                                                                            | $\epsilon$ -CL                                                                        |
|-----------------------------|-------------------------------------------------------------------------------------|---------------------------------------------------------------------------------------|
| Molecular geometry          | 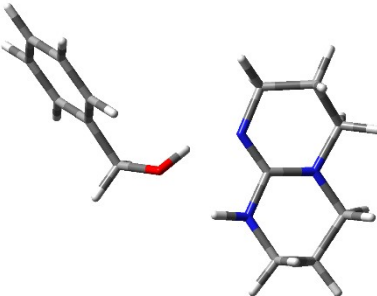   |    |
| <i>Vacuum</i>               |                                                                                     |                                                                                       |
| $E_{\text{DFT}}$ (kcal/mol) | -493092.1104                                                                        | -241722.1152                                                                          |
| $E_0$ (kcal/mol)            | -492878.1956                                                                        | -241623.8527                                                                          |
| $E_{298}$ (kcal/mol)        | -492867.4037                                                                        | -241619.3215                                                                          |
| $H_{298}$ (kcal/mol)        | -492866.8113                                                                        | -241618.7285                                                                          |
| $G_{298}$ (kcal/mol)        | -492908.9316                                                                        | -241643.6431                                                                          |
| <i>Toluene</i>              |                                                                                     |                                                                                       |
| $E_{\text{DFT}}$ (kcal/mol) | -493094.9932                                                                        | -241725.0684                                                                          |
| $E_0$ (kcal/mol)            | -492881.2691                                                                        | -241626.8039                                                                          |
| $E_{298}$ (kcal/mol)        | -492870.4509                                                                        | -241622.2840                                                                          |
| $H_{298}$ (kcal/mol)        | -492869.8579                                                                        | -241621.6916                                                                          |
| $G_{298}$ (kcal/mol)        | -492912.2512                                                                        | -241646.5567                                                                          |
| State                       | <b>I1</b>                                                                           | <b>TS12</b>                                                                           |
| Molecular geometry          |  |  |
| <i>Vacuum</i>               |                                                                                     |                                                                                       |
| $E_{\text{DFT}}$ (kcal/mol) | -734821.9444                                                                        | -734807.3864                                                                          |
| $E_0$ (kcal/mol)            | -734509.6142                                                                        | -734494.9920                                                                          |
| $E_{298}$ (kcal/mol)        | -734492.8459                                                                        | -734479.5778                                                                          |
| $H_{298}$ (kcal/mol)        | -734492.2535                                                                        | -734478.9855                                                                          |

|                             |              |              |
|-----------------------------|--------------|--------------|
| $G_{298}$ (kcal/mol)        | -734550.1068 | -734531.1102 |
| <i>Toluene</i>              |              |              |
| $E_{\text{DFT}}$ (kcal/mol) | -734825.4678 | -734812.6276 |
| $E_0$ (kcal/mol)            | -734513.3717 | -734500.2417 |
| $E_{298}$ (kcal/mol)        | -734496.5595 | -734484.7498 |
| $H_{298}$ (kcal/mol)        | -734495.9671 | -734484.1574 |
| $G_{298}$ (kcal/mol)        | -734554.1630 | -734536.4804 |

**State**

**I2**

**TS23**

Molecular geometry

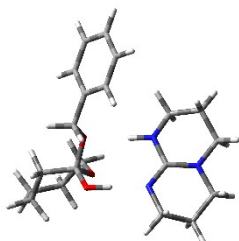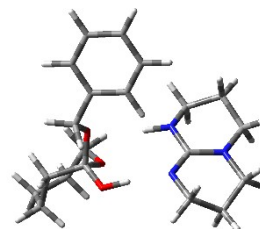

*Vacuum*

|                             |              |              |
|-----------------------------|--------------|--------------|
| $E_{\text{DFT}}$ (kcal/mol) | -734812.4160 | -734812.0071 |
| $E_0$ (kcal/mol)            | -734498.9302 | -734498.5305 |
| $E_{298}$ (kcal/mol)        | -734483.2375 | -734483.3636 |
| $H_{298}$ (kcal/mol)        | -734482.6451 | -734482.7712 |
| $G_{298}$ (kcal/mol)        | -734536.4672 | -734534.2201 |

*Toluene*

|                             |              |              |
|-----------------------------|--------------|--------------|
| $E_{\text{DFT}}$ (kcal/mol) | -734815.9097 | -734815.5064 |
| $E_0$ (kcal/mol)            | -734502.5547 | -734502.2391 |
| $E_{298}$ (kcal/mol)        | -734486.8846 | -734487.0621 |
| $H_{298}$ (kcal/mol)        | -734486.2922 | -734486.4698 |
| $G_{298}$ (kcal/mol)        | -734539.8081 | -734538.0623 |

**State**

**I3**

**TS3r**

Molecular geometry

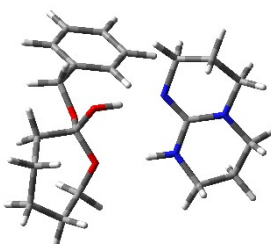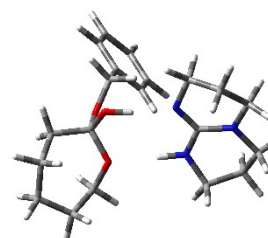

*Vacuum*

|                             |              |              |
|-----------------------------|--------------|--------------|
| $E_{\text{DFT}}$ (kcal/mol) | -734812.6996 | -734810.9058 |
| $E_0$ (kcal/mol)            | -734499.1015 | -734497.4255 |
| $E_{298}$ (kcal/mol)        | -734483.4565 | -734482.2322 |
| $H_{298}$ (kcal/mol)        | -734482.8641 | -734481.6398 |
| $G_{298}$ (kcal/mol)        | -734536.1792 | -734533.8486 |

*Toluene*

|                             |              |              |
|-----------------------------|--------------|--------------|
| $E_{\text{DFT}}$ (kcal/mol) | -734816.2859 | -734814.5648 |
| $E_0$ (kcal/mol)            | -734502.8603 | -734501.2696 |



|                      |              |              |
|----------------------|--------------|--------------|
| $E_{298}$ (kcal/mol) | -734487.2441 | -734486.0977 |
| $H_{298}$ (kcal/mol) | -734486.6518 | -734485.5053 |
| $G_{298}$ (kcal/mol) | -734539.5081 | -734537.3351 |

State

I3r

TS3r2

Molecular geometry

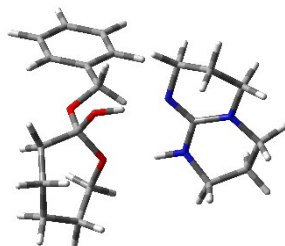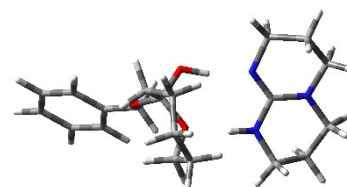

*Vacuum*

|                             |              |              |
|-----------------------------|--------------|--------------|
| $E_{\text{DFT}}$ (kcal/mol) | -734813.9256 | -734812.6021 |
| $E_0$ (kcal/mol)            | -734500.3622 | -734499.3714 |
| $E_{298}$ (kcal/mol)        | -734484.6795 | -734484.1994 |
| $H_{298}$ (kcal/mol)        | -734484.0871 | -734483.6071 |
| $G_{298}$ (kcal/mol)        | -734537.8528 | -734535.7594 |

*Toluene*

|                             |              |              |
|-----------------------------|--------------|--------------|
| $E_{\text{DFT}}$ (kcal/mol) | -734817.4927 | -734816.2733 |
| $E_0$ (kcal/mol)            | -734504.1147 | -734503.1634 |
| $E_{298}$ (kcal/mol)        | -734488.4558 | -734488.0266 |
| $H_{298}$ (kcal/mol)        | -734487.8635 | -734487.4343 |
| $G_{298}$ (kcal/mol)        | -734541.1742 | -734539.1956 |

State

I3r2

TS34

Molecular geometry

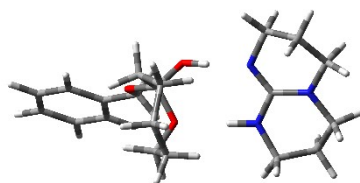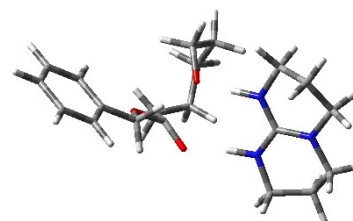

*Vacuum*

|                             |              |              |
|-----------------------------|--------------|--------------|
| $E_{\text{DFT}}$ (kcal/mol) | -734813.3399 | -734805.8451 |
| $E_0$ (kcal/mol)            | -734499.9085 | -734494.2490 |
| $E_{298}$ (kcal/mol)        | -734484.1831 | -734478.6108 |
| $H_{298}$ (kcal/mol)        | -734483.5908 | -734478.0185 |
| $G_{298}$ (kcal/mol)        | -734537.6551 | -734531.5093 |

*Toluene*

|                             |              |              |
|-----------------------------|--------------|--------------|
| $E_{\text{DFT}}$ (kcal/mol) | -734816.8049 | -734811.2779 |
| $E_0$ (kcal/mol)            | -734503.4590 | -734499.6148 |
| $E_{298}$ (kcal/mol)        | -734487.8114 | -734483.9516 |
| $H_{298}$ (kcal/mol)        | -734487.2190 | -734483.3592 |
| $G_{298}$ (kcal/mol)        | -734540.4839 | -734536.2043 |

**State****I4****I5**

Molecular geometry

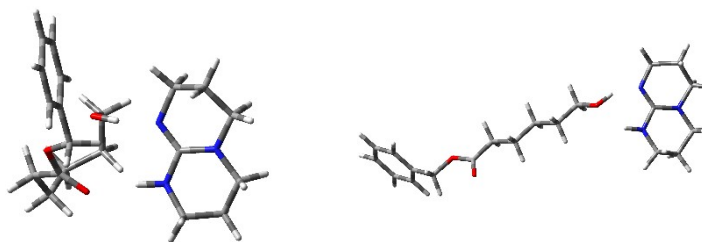*Vacuum*

|                             |              |              |
|-----------------------------|--------------|--------------|
| $E_{\text{DFT}}$ (kcal/mol) | -734823.0823 | -734823.0232 |
| $E_0$ (kcal/mol)            | -734510.1727 | -734510.7688 |
| $E_{298}$ (kcal/mol)        | -734493.6366 | -734493.7062 |
| $H_{298}$ (kcal/mol)        | -734493.0436 | -734493.1132 |
| $G_{298}$ (kcal/mol)        | -734548.4031 | -734554.1103 |
| <i>Toluene</i>              |              |              |
| $E_{\text{DFT}}$ (kcal/mol) | -734826.0918 | -734827.4903 |
| $E_0$ (kcal/mol)            | -734513.3253 | -734515.4312 |
| $E_{298}$ (kcal/mol)        | -734496.7904 | -734498.3736 |
| $H_{298}$ (kcal/mol)        | -734496.1981 | -734497.7813 |
| $G_{298}$ (kcal/mol)        | -734551.3342 | -734557.5930 |

**b) Next step of the polymerization (calculated only in toluene solution)**

Thermodynamic parameters of DFT-optimized structures in the second step of the TBD catalyzed ROP of  $\epsilon$ -CL/3-isomer/7-isomer in toluene solution calculated by the PCM-B3LYP/6-311G(d) method: electronic energies (with the nuclear repulsion)  $E_{\text{DFT}}$ , sum of electronic and zero-point energies  $E_0$ , sum of electronic and thermal energies  $E_{298}$ , sum of electronic and thermal enthalpies  $H_{298}$ , and sum of electronic and thermal free energies  $G_{298}$

**Addition of another  $\epsilon$ -CL unit to the  $\epsilon$ -CL chain end****State****I1****TS12***Toluene*

|                             |              |              |
|-----------------------------|--------------|--------------|
| $E_{\text{DFT}}$ (kcal/mol) | -976557.7593 | -976543.9082 |
| $E_0$ (kcal/mol)            | -976147.2458 | -976133.3728 |
| $E_{298}$ (kcal/mol)        | -976124.2080 | -976111.7143 |
| $H_{298}$ (kcal/mol)        | -976123.6157 | -976111.1220 |
| $G_{298}$ (kcal/mol)        | -976198.7078 | -976180.4988 |

**State****I2****TS2r***Toluene*

|                             |              |              |
|-----------------------------|--------------|--------------|
| $E_{\text{DFT}}$ (kcal/mol) | -976548.3000 | -976548.2925 |
| $E_0$ (kcal/mol)            | -976136.6083 | -976136.6635 |
| $E_{298}$ (kcal/mol)        | -976114.7402 | -976115.3445 |
| $H_{298}$ (kcal/mol)        | -976114.1478 | -976114.7521 |
| $G_{298}$ (kcal/mol)        | -976185.0658 | -976183.5058 |

| State                       | I2r          | TS23         |
|-----------------------------|--------------|--------------|
| <i>Toluene</i>              |              |              |
| $E_{\text{DFT}}$ (kcal/mol) | -976549.7460 | -976546.2078 |
| $E_0$ (kcal/mol)            | -976137.9122 | -976134.8449 |
| $E_{298}$ (kcal/mol)        | -976116.0730 | -976113.4400 |
| $H_{298}$ (kcal/mol)        | -976115.4806 | -976112.8476 |
| $G_{298}$ (kcal/mol)        | -976185.5841 | -976181.6113 |

| State                       | I3           | TS3r         |
|-----------------------------|--------------|--------------|
| <i>Toluene</i>              |              |              |
| $E_{\text{DFT}}$ (kcal/mol) | -976546.6705 | -976546.0198 |
| $E_0$ (kcal/mol)            | -976135.1091 | -976134.8286 |
| $E_{298}$ (kcal/mol)        | -976113.1312 | -976113.2994 |
| $H_{298}$ (kcal/mol)        | -976112.5389 | -976112.7070 |
| $G_{298}$ (kcal/mol)        | -976183.4901 | -976182.9950 |

| State                       | I3r          | TS34         |
|-----------------------------|--------------|--------------|
| <i>Toluene</i>              |              |              |
| $E_{\text{DFT}}$ (kcal/mol) | -976550.4311 | -976544.8153 |
| $E_0$ (kcal/mol)            | -976138.7681 | -976134.6592 |
| $E_{298}$ (kcal/mol)        | -976116.8687 | -976112.8250 |
| $H_{298}$ (kcal/mol)        | -976116.2763 | -976112.2326 |
| $G_{298}$ (kcal/mol)        | -976186.9565 | -976182.2075 |

| State                       | I4           | I5           |
|-----------------------------|--------------|--------------|
| <i>Toluene</i>              |              |              |
| $E_{\text{DFT}}$ (kcal/mol) | -976559.0777 | -976561.4381 |
| $E_0$ (kcal/mol)            | -976148.0509 | -976150.8766 |
| $E_{298}$ (kcal/mol)        | -976125.2359 | -976127.6681 |
| $H_{298}$ (kcal/mol)        | -976124.6435 | -976127.0758 |
| $G_{298}$ (kcal/mol)        | -976198.5447 | -976202.7170 |

#### Addition of another $\epsilon$ -CL unit to the 3-isomer chain end

| State                       | I1            | TS12          |
|-----------------------------|---------------|---------------|
| <i>Toluene</i>              |               |               |
| $E_{\text{DFT}}$ (kcal/mol) | -1049021.3610 | -1049007.4121 |
| $E_0$ (kcal/mol)            | -1048586.9962 | -1048573.2989 |
| $E_{298}$ (kcal/mol)        | -1048561.9611 | -1048549.4875 |
| $H_{298}$ (kcal/mol)        | -1048561.3687 | -1048548.8951 |
| $G_{298}$ (kcal/mol)        | -1048641.4057 | -1048624.1109 |

| State                       | I2            | TS2r          |
|-----------------------------|---------------|---------------|
| <i>Toluene</i>              |               |               |
| $E_{\text{DFT}}$ (kcal/mol) | -1049011.4507 | -1049011.4256 |
| $E_0$ (kcal/mol)            | -1048576.1089 | -1048576.1303 |
| $E_{298}$ (kcal/mol)        | -1048552.1864 | -1048552.7254 |
| $H_{298}$ (kcal/mol)        | -1048551.5940 | -1048552.1330 |
| $G_{298}$ (kcal/mol)        | -1048626.5532 | -1048625.2323 |

| <b>State</b>                | <b>I2r</b>    | <b>TS23</b>   |
|-----------------------------|---------------|---------------|
| <i>Toluene</i>              |               |               |
| $E_{\text{DFT}}$ (kcal/mol) | -1049012.7871 | -1049012.3841 |
| $E_0$ (kcal/mol)            | -1048577.2573 | -1048577.1751 |
| $E_{298}$ (kcal/mol)        | -1048553.3291 | -1048553.6623 |
| $H_{298}$ (kcal/mol)        | -1048552.7367 | -1048553.0699 |
| $G_{298}$ (kcal/mol)        | -1048627.4486 | -1048626.6749 |

| <b>State</b>                | <b>I3</b>     | <b>TS3r</b>   |
|-----------------------------|---------------|---------------|
| <i>Toluene</i>              |               |               |
| $E_{\text{DFT}}$ (kcal/mol) | -1049012.5510 | -1049011.4206 |
| $E_0$ (kcal/mol)            | -1048577.2102 | -1048576.2376 |
| $E_{298}$ (kcal/mol)        | -1048553.2161 | -1048552.7191 |
| $H_{298}$ (kcal/mol)        | -1048552.6238 | -1048552.1268 |
| $G_{298}$ (kcal/mol)        | -1048628.0109 | -1048626.3417 |

| <b>State</b>                | <b>I3r</b>    | <b>TSr2</b>   |
|-----------------------------|---------------|---------------|
| <i>Toluene</i>              |               |               |
| $E_{\text{DFT}}$ (kcal/mol) | -1049014.2466 | -1049013.0298 |
| $E_0$ (kcal/mol)            | -1048578.8461 | -1048577.8553 |
| $E_{298}$ (kcal/mol)        | -1048554.8803 | -1048554.4203 |
| $H_{298}$ (kcal/mol)        | -1048554.2873 | -1048553.8273 |
| $G_{298}$ (kcal/mol)        | -1048629.4516 | -1048627.1054 |

| <b>State</b>                | <b>I3r2</b>   | <b>TS34</b>   |
|-----------------------------|---------------|---------------|
| <i>Toluene</i>              |               |               |
| $E_{\text{DFT}}$ (kcal/mol) | -1049013.6905 | -1049008.2023 |
| $E_0$ (kcal/mol)            | -1048578.4608 | -1048574.3099 |
| $E_{298}$ (kcal/mol)        | -1048554.4322 | -1048550.3992 |
| $H_{298}$ (kcal/mol)        | -1048553.8399 | -1048549.8069 |
| $G_{298}$ (kcal/mol)        | -1048629.7905 | -1048624.6073 |

| <b>State</b>                | <b>I4</b>     | <b>I5</b>     |
|-----------------------------|---------------|---------------|
| <i>Toluene</i>              |               |               |
| $E_{\text{DFT}}$ (kcal/mol) | -1049022.8284 | -1049025.1433 |
| $E_0$ (kcal/mol)            | -1048588.2205 | -1048591.0022 |
| $E_{298}$ (kcal/mol)        | -1048563.2613 | -1048565.6841 |
| $H_{298}$ (kcal/mol)        | -1048562.6683 | -1048565.0911 |
| $G_{298}$ (kcal/mol)        | -1048642.8245 | -1048646.1904 |

**Addition of another  $\epsilon$ -CL unit to the 7-isomer chain end**

| <b>State</b>                | <b>I1</b>     | <b>TS12</b>   |
|-----------------------------|---------------|---------------|
| <i>Toluene</i>              |               |               |
| $E_{\text{DFT}}$ (kcal/mol) | -1049023.8998 | -1049010.0880 |
| $E_0$ (kcal/mol)            | -1048590.0836 | -1048575.8604 |
| $E_{298}$ (kcal/mol)        | -1048564.9826 | -1048552.1161 |
| $H_{298}$ (kcal/mol)        | -1048564.3902 | -1048551.5237 |
| $G_{298}$ (kcal/mol)        | -1048644.5024 | -1048625.6966 |

| <b>State</b>   | <b>I2</b> | <b>TS23</b> |
|----------------|-----------|-------------|
| <i>Toluene</i> |           |             |

|                             |               |               |
|-----------------------------|---------------|---------------|
| $E_{\text{DFT}}$ (kcal/mol) | -1049013.5984 | -1049013.5982 |
| $E_0$ (kcal/mol)            | -1048578.5857 | -1048578.6221 |
| $E_{298}$ (kcal/mol)        | -1048554.5678 | -1048555.1714 |
| $H_{298}$ (kcal/mol)        | -1048553.9748 | -1048554.5791 |
| $G_{298}$ (kcal/mol)        | -1048629.6995 | -1048627.5107 |

| <b>State</b>                | <b>I3</b>     | <b>TS3r</b>   |
|-----------------------------|---------------|---------------|
| <i>Toluene</i>              |               |               |
| $E_{\text{DFT}}$ (kcal/mol) | -1049014.2332 | -1049013.0953 |
| $E_0$ (kcal/mol)            | -1048579.2371 | -1048578.2738 |
| $E_{298}$ (kcal/mol)        | -1048555.2417 | -1048554.8269 |
| $H_{298}$ (kcal/mol)        | -1048554.6494 | -1048554.2339 |
| $G_{298}$ (kcal/mol)        | -1048629.9881 | -1048627.5547 |

| <b>State</b>                | <b>I3r</b>    | <b>TS3r2</b>  |
|-----------------------------|---------------|---------------|
| <i>Toluene</i>              |               |               |
| $E_{\text{DFT}}$ (kcal/mol) | -1049015.2628 | -1049014.5745 |
| $E_0$ (kcal/mol)            | -1048580.2712 | -1048579.8953 |
| $E_{298}$ (kcal/mol)        | -1048556.2683 | -1048556.3882 |
| $H_{298}$ (kcal/mol)        | -1048555.6760 | -1048555.7958 |
| $G_{298}$ (kcal/mol)        | -1048630.9175 | -1048629.5169 |

| <b>State</b>                | <b>I3r2</b>   | <b>TS34</b>   |
|-----------------------------|---------------|---------------|
| <i>Toluene</i>              |               |               |
| $E_{\text{DFT}}$ (kcal/mol) | -1049015.2524 | -1049011.3625 |
| $E_0$ (kcal/mol)            | -1048580.3478 | -1048577.5560 |
| $E_{298}$ (kcal/mol)        | -1048556.3160 | -1048553.6585 |
| $H_{298}$ (kcal/mol)        | -1048555.7237 | -1048553.0655 |
| $G_{298}$ (kcal/mol)        | -1048631.5004 | -1048627.9456 |

| <b>State</b>                | <b>I4</b>     | <b>I5</b>     |
|-----------------------------|---------------|---------------|
| <i>Toluene</i>              |               |               |
| $E_{\text{DFT}}$ (kcal/mol) | -1049024.5476 | -1049028.0558 |
| $E_0$ (kcal/mol)            | -1048590.2932 | -1048594.2007 |
| $E_{298}$ (kcal/mol)        | -1048565.3716 | -1048568.9177 |
| $H_{298}$ (kcal/mol)        | -1048564.7792 | -1048568.3247 |
| $G_{298}$ (kcal/mol)        | -1048643.0014 | -1048649.1962 |

#### Addition of another 3-isomer unit to the $\epsilon$ -CL chain end

| <b>State</b>                | <b>I1</b>     | <b>TS12</b>   |
|-----------------------------|---------------|---------------|
| <i>Toluene</i>              |               |               |
| $E_{\text{DFT}}$ (kcal/mol) | -1049022.6854 | -1049008.4644 |
| $E_0$ (kcal/mol)            | -1048588.8430 | -1048574.2772 |
| $E_{298}$ (kcal/mol)        | -1048563.6253 | -1048550.4965 |
| $H_{298}$ (kcal/mol)        | -1048563.0329 | -1048549.9041 |
| $G_{298}$ (kcal/mol)        | -1048643.4645 | -1048623.9597 |

| <b>State</b>                | <b>I2</b>     | <b>TS23</b>   |
|-----------------------------|---------------|---------------|
| <i>Toluene</i>              |               |               |
| $E_{\text{DFT}}$ (kcal/mol) | -1049010.3404 | -1049010.1788 |
| $E_0$ (kcal/mol)            | -1048575.1488 | -1048575.3402 |

|                      |               |               |
|----------------------|---------------|---------------|
| $E_{298}$ (kcal/mol) | -1048551.2357 | -1048551.8005 |
| $H_{298}$ (kcal/mol) | -1048550.6433 | -1048551.2075 |
| $G_{298}$ (kcal/mol) | -1048625.0415 | -1048624.5834 |

| <b>State</b>                | <b>I3</b>     | <b>TS3r</b>   |
|-----------------------------|---------------|---------------|
| <i>Toluene</i>              |               |               |
| $E_{\text{DFT}}$ (kcal/mol) | -1049015.9230 | -1049014.8565 |
| $E_0$ (kcal/mol)            | -1048580.9401 | -1048580.1426 |
| $E_{298}$ (kcal/mol)        | -1048556.8601 | -1048556.5689 |
| $H_{298}$ (kcal/mol)        | -1048556.2677 | -1048555.9765 |
| $G_{298}$ (kcal/mol)        | -1048631.5469 | -1048630.0013 |

| <b>State</b>                | <b>I3r</b>    | <b>TS34</b>   |
|-----------------------------|---------------|---------------|
| <i>Toluene</i>              |               |               |
| $E_{\text{DFT}}$ (kcal/mol) | -1049015.5954 | -1049010.1816 |
| $E_0$ (kcal/mol)            | -1048580.6063 | -1048576.8500 |
| $E_{298}$ (kcal/mol)        | -1048556.5275 | -1048552.7643 |
| $H_{298}$ (kcal/mol)        | -1048555.9351 | -1048552.1720 |
| $G_{298}$ (kcal/mol)        | -1048631.3586 | -1048627.5214 |

| <b>State</b>                | <b>I4</b>     | <b>I5</b>     |
|-----------------------------|---------------|---------------|
| <i>Toluene</i>              |               |               |
| $E_{\text{DFT}}$ (kcal/mol) | -1049023.0575 | -1049025.2892 |
| $E_0$ (kcal/mol)            | -1048588.6152 | -1048591.0970 |
| $E_{298}$ (kcal/mol)        | -1048563.5838 | -1048565.7989 |
| $H_{298}$ (kcal/mol)        | -1048562.9915 | -1048565.2066 |
| $G_{298}$ (kcal/mol)        | -1048641.3498 | -1048646.0530 |

#### Addition of another 7-isomer unit to the $\epsilon$ -CL chain end

| <b>State</b>                | <b>I1</b>     | <b>TS12</b>   |
|-----------------------------|---------------|---------------|
| <i>Toluene</i>              |               |               |
| $E_{\text{DFT}}$ (kcal/mol) | -1049025.3446 | -1049011.4546 |
| $E_0$ (kcal/mol)            | -1048591.5344 | -1048577.7768 |
| $E_{298}$ (kcal/mol)        | -1048566.3844 | -1048553.8907 |
| $H_{298}$ (kcal/mol)        | -1048565.7920 | -1048553.2983 |
| $G_{298}$ (kcal/mol)        | -1048645.2247 | -1048627.8389 |

| <b>State</b>                | <b>I2</b>     | <b>TS2r</b>   |
|-----------------------------|---------------|---------------|
| <i>Toluene</i>              |               |               |
| $E_{\text{DFT}}$ (kcal/mol) | -1049015.8072 | -1049015.8113 |
| $E_0$ (kcal/mol)            | -1048580.8962 | -1048580.8968 |
| $E_{298}$ (kcal/mol)        | -1048556.8199 | -1048557.4110 |
| $H_{298}$ (kcal/mol)        | -1048556.2275 | -1048556.8187 |
| $G_{298}$ (kcal/mol)        | -1048632.7486 | -1048630.1620 |

| <b>State</b>                | <b>I2r</b>    | <b>TS23</b>   |
|-----------------------------|---------------|---------------|
| <i>Toluene</i>              |               |               |
| $E_{\text{DFT}}$ (kcal/mol) | -1049017.2405 | -1049015.8058 |
| $E_0$ (kcal/mol)            | -1048582.2767 | -1048581.0098 |
| $E_{298}$ (kcal/mol)        | -1048558.2080 | -1048557.4129 |
| $H_{298}$ (kcal/mol)        | -1048557.6156 | -1048556.8205 |

|                             |               |               |
|-----------------------------|---------------|---------------|
| $G_{298}$ (kcal/mol)        | -1048633.3685 | -1048630.3521 |
| <b>State</b>                | <b>I3</b>     | <b>TS3r</b>   |
| <i>Toluene</i>              |               |               |
| $E_{\text{DFT}}$ (kcal/mol) | -1049016.4407 | -1049015.0023 |
| $E_0$ (kcal/mol)            | -1048581.5532 | -1048580.3478 |
| $E_{298}$ (kcal/mol)        | -1048557.4562 | -1048556.6957 |
| $H_{298}$ (kcal/mol)        | -1048556.8638 | -1048556.1033 |
| $G_{298}$ (kcal/mol)        | -1048632.3677 | -1048630.2454 |
| <b>State</b>                | <b>I3r</b>    | <b>TS34</b>   |
| <i>Toluene</i>              |               |               |
| $E_{\text{DFT}}$ (kcal/mol) | -1049017.7514 | -1049013.2396 |
| $E_0$ (kcal/mol)            | -1048582.8120 | -1048579.3331 |
| $E_{298}$ (kcal/mol)        | -1048558.7282 | -1048555.4112 |
| $H_{298}$ (kcal/mol)        | -1048558.1358 | -1048554.8188 |
| $G_{298}$ (kcal/mol)        | -1048633.6735 | -1048629.3387 |
| <b>State</b>                | <b>I4</b>     | <b>I5</b>     |
| <i>Toluene</i>              |               |               |
| $E_{\text{DFT}}$ (kcal/mol) | -1049028.2553 | -1049030.6416 |
| $E_0$ (kcal/mol)            | -1048593.9076 | -1048596.7778 |
| $E_{298}$ (kcal/mol)        | -1048568.9428 | -1048571.4898 |
| $H_{298}$ (kcal/mol)        | -1048568.3498 | -1048570.8975 |
| $G_{298}$ (kcal/mol)        | -1048646.5557 | -1048652.0319 |

*A note on artefact intermediate states*

The geometry optimization in all standard quantum chemical methods is based on the minimization of the total electronic energy of the molecule plus the nuclear repulsion energy (here  $E_{\text{DFT}}$ ). However, the Gibbs free energy  $G$  includes also the zero-point energy and thermal corrections. Consequently, some shallow intermediate states (local minima of  $E_{\text{DFT}}$ ) found by the geometry optimization and IRC calculations do not need to be local minima of  $G$ . Consequently, such intermediate states should be considered either thermally unstable at the given temperature, or even artefacts of the method if it happens at zero temperature due to zero-point energy corrections. Such artefact intermediate states (not shown in Table S4) were found for all isomers between TS12 and I2 and between I3 and TS34.

## Encapsulation of model drug

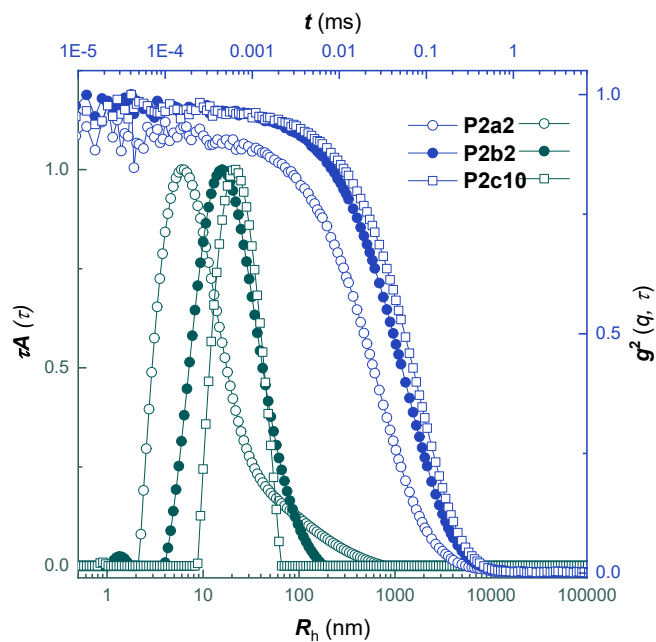

**Figure S4:** Autocorrelation functions at  $130^\circ$  (blue) and the corresponding apparent size distributions of loaded nanoparticles (green)

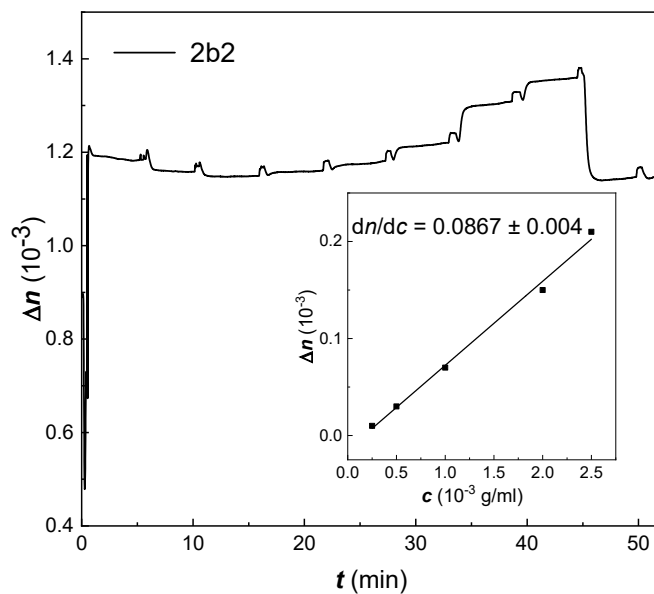

**Figure S5:** Determination of  $dn/dc$  with the linear fit in inset



## Optimized Cartesian coordinates

**Table S5:** Cartesian coordinates (in Angstroms) of all intermediates and transition states of the initial step of the TBD-catalyzed ROP of  $\epsilon$ -CL (Scheme 1) optimized in vacuum and toluene using the (PCM-)B3LYP/6-311G(d) method

39 atoms

complex BnO-TBD in vacuum

|   |           |           |           |
|---|-----------|-----------|-----------|
| N | -3.241467 | 0.563143  | 0.190145  |
| C | -1.998784 | 0.003327  | -0.020043 |
| N | -1.946517 | -1.367762 | -0.145904 |
| C | -3.119525 | -2.160628 | -0.454968 |
| C | -4.255264 | -1.689893 | 0.444854  |
| C | -4.487622 | -0.200415 | 0.219037  |
| C | -2.196368 | 2.728578  | -0.374120 |
| C | -0.915255 | 2.095487  | 0.167159  |
| N | -0.880107 | 0.663219  | -0.069861 |
| C | -3.400262 | 2.017324  | 0.233253  |
| H | -2.881710 | -3.210250 | -0.267729 |
| H | -3.417030 | -2.078313 | -1.513158 |
| H | -3.980603 | -1.875185 | 1.487316  |
| H | -5.178528 | -2.237925 | 0.237310  |
| H | -5.032534 | -0.046343 | -0.725312 |
| H | -5.121627 | 0.207917  | 1.014998  |
| H | -4.313270 | 2.276294  | -0.315818 |
| H | -3.553460 | 2.340114  | 1.272755  |
| H | -2.215512 | 2.621284  | -1.463764 |
| H | -2.246122 | 3.797885  | -0.147075 |
| H | -0.825789 | 2.310374  | 1.243866  |
| H | -0.037156 | 2.543775  | -0.305724 |
| H | -1.034403 | -1.706653 | -0.434929 |
| O | 0.957556  | -1.235363 | -0.771667 |
| C | 1.872263  | -1.470210 | 0.280752  |
| C | 3.162800  | -0.675918 | 0.167688  |
| H | 2.109790  | -2.540237 | 0.255359  |
| H | 1.407699  | -1.270102 | 1.256859  |
| C | 3.608331  | -0.210695 | -1.071240 |
| C | 3.946542  | -0.432011 | 1.299087  |
| C | 4.812625  | 0.482629  | -1.176503 |
| H | 2.993092  | -0.390773 | -1.945525 |
| C | 5.153348  | 0.255989  | 1.196408  |
| H | 3.606883  | -0.778357 | 2.272468  |
| H | 5.144536  | 0.841072  | -2.146473 |
| C | 5.590987  | 0.716297  | -0.044447 |
| H | 5.748323  | 0.440104  | 2.086015  |
| H | 6.528670  | 1.257244  | -0.126712 |

|   |          |           |           |
|---|----------|-----------|-----------|
| H | 0.472038 | -0.388379 | -0.583552 |
|---|----------|-----------|-----------|

18 atoms

$\epsilon$ -CL in vacuum

|   |           |           |           |
|---|-----------|-----------|-----------|
| O | 2.499434  | -0.087899 | -0.406435 |
| O | 0.773420  | 1.240263  | -0.078821 |
| C | 1.378077  | 0.024628  | 0.009116  |
| C | 0.596173  | -1.139251 | 0.600195  |
| H | 0.284515  | -0.907540 | 1.625743  |
| H | 1.311017  | -1.959413 | 0.661023  |
| C | -0.629448 | -1.563671 | -0.235108 |
| H | -0.349520 | -1.598522 | -1.294209 |
| H | -0.888287 | -2.590296 | 0.041781  |
| C | -1.865170 | -0.678760 | -0.040769 |
| H | -2.197822 | -0.761644 | 1.002463  |
| H | -2.685841 | -1.071870 | -0.650133 |
| C | -1.656511 | 0.801857  | -0.375973 |
| H | -1.434201 | 0.931416  | -1.441310 |
| H | -2.591089 | 1.343434  | -0.189174 |
| C | -0.552720 | 1.488010  | 0.424372  |
| H | -0.605536 | 1.227651  | 1.487605  |
| H | -0.648471 | 2.570982  | 0.347269  |

57 atoms

$\epsilon$ -CL, structure I1 in vacuum

|   |           |           |           |
|---|-----------|-----------|-----------|
| O | -2.397324 | 0.781183  | -1.711365 |
| O | -2.754832 | 0.541123  | 0.439565  |
| C | -2.813390 | 0.071331  | -0.822221 |
| C | -3.437672 | -1.284012 | -1.083851 |
| H | -2.768943 | -2.044685 | -0.668368 |
| H | -3.423087 | -1.402913 | -2.167400 |
| C | -4.869284 | -1.468438 | -0.543314 |
| H | -5.471152 | -0.583054 | -0.780518 |
| H | -5.327865 | -2.297611 | -1.091395 |
| C | -4.948590 | -1.775048 | 0.956238  |
| H | -4.412182 | -2.712514 | 1.152013  |
| H | -5.993203 | -1.960877 | 1.229084  |
| C | -4.380450 | -0.679559 | 1.863966  |
| H | -4.981668 | 0.234120  | 1.787476  |
| H | -4.451710 | -1.007485 | 2.907875  |
| C | -2.924868 | -0.319364 | 1.589843  |
| H | -2.284280 | -1.195276 | 1.468837  |
| H | -2.520920 | 0.279568  | 2.405793  |
| O | -0.309474 | -1.339532 | -0.047709 |
| C | 0.434709  | -1.884796 | -1.114543 |

|   |           |           |           |
|---|-----------|-----------|-----------|
| C | 1.633263  | -2.717219 | -0.684481 |
| H | 0.771007  | -1.094248 | -1.798988 |
| H | -0.246417 | -2.524648 | -1.690101 |
| C | 1.718519  | -3.241119 | 0.606637  |
| C | 2.656523  | -3.004413 | -1.593387 |
| C | 2.801282  | -4.035785 | 0.981371  |
| H | 0.928784  | -3.009789 | 1.312264  |
| C | 3.737592  | -3.800860 | -1.224000 |
| H | 2.609266  | -2.596411 | -2.600474 |
| H | 2.853313  | -4.434392 | 1.990399  |
| C | 3.813771  | -4.320505 | 0.067723  |
| H | 4.524721  | -4.011025 | -1.942100 |
| H | 4.657348  | -4.938516 | 0.359387  |
| H | 0.120979  | -0.479452 | 0.225976  |
| N | 1.841658  | 3.168498  | 0.363415  |
| C | 0.949556  | 2.146630  | 0.095149  |
| N | -0.056352 | 2.425386  | -0.783415 |
| C | -0.169557 | 3.657311  | -1.534003 |
| C | 0.298412  | 4.814147  | -0.659646 |
| C | 1.712341  | 4.519486  | -0.175635 |
| C | 3.346395  | 1.422846  | 1.257251  |
| C | 2.036083  | 0.737672  | 1.640153  |
| N | 1.007839  | 0.962360  | 0.637255  |
| C | 3.088571  | 2.914700  | 1.085477  |
| H | -1.214607 | 3.772931  | -1.827149 |
| H | 0.423937  | 3.626732  | -2.461280 |
| H | -0.378051 | 4.917762  | 0.194196  |
| H | 0.289988  | 5.757812  | -1.212688 |
| H | 2.426735  | 4.659443  | -1.002273 |
| H | 2.002260  | 5.228380  | 0.609662  |
| H | 3.911043  | 3.385669  | 0.531448  |
| H | 3.044862  | 3.410857  | 2.065625  |
| H | 3.707956  | 0.992075  | 0.318186  |
| H | 4.123756  | 1.267771  | 2.011800  |
| H | 1.708403  | 1.102478  | 2.627924  |
| H | 2.185315  | -0.340292 | 1.742523  |
| H | -0.773796 | 1.723670  | -0.914799 |

57 atoms

$\epsilon$ -CL, structure TS12 in vacuum

|   |          |           |           |
|---|----------|-----------|-----------|
| O | 1.720761 | -0.634484 | -1.638691 |
| O | 2.241480 | -0.743881 | 0.514964  |
| C | 2.175598 | 0.002184  | -0.663316 |
| C | 3.318799 | 0.995252  | -0.899996 |
| H | 3.193286 | 1.887289  | -0.282638 |
| H | 3.220144 | 1.305287  | -1.941149 |

|   |           |           |           |
|---|-----------|-----------|-----------|
| C | 4.714350  | 0.388039  | -0.660814 |
| H | 4.740966  | -0.638948 | -1.042283 |
| H | 5.444086  | 0.951471  | -1.252959 |
| C | 5.159642  | 0.429645  | 0.808762  |
| H | 5.148792  | 1.476401  | 1.141576  |
| H | 6.203712  | 0.102560  | 0.880882  |
| C | 4.311943  | -0.408563 | 1.774200  |
| H | 4.478216  | -1.476332 | 1.588646  |
| H | 4.643277  | -0.216558 | 2.803049  |
| C | 2.806454  | -0.158752 | 1.690582  |
| H | 2.553578  | 0.903314  | 1.739175  |
| H | 2.304480  | -0.654921 | 2.526058  |
| O | 0.830936  | 1.160469  | -0.084232 |
| C | 0.329129  | 1.945201  | -1.125372 |
| C | -0.881288 | 2.760218  | -0.700103 |
| H | 0.062531  | 1.330217  | -2.000846 |
| H | 1.098148  | 2.655468  | -1.481627 |
| C | -0.935628 | 3.334568  | 0.575376  |
| C | -1.951989 | 2.979295  | -1.571639 |
| C | -2.024538 | 4.112111  | 0.963706  |
| H | -0.111710 | 3.155970  | 1.257801  |
| C | -3.044056 | 3.757571  | -1.188031 |
| H | -1.930374 | 2.533762  | -2.563003 |
| H | -2.045080 | 4.555884  | 1.955194  |
| C | -3.084658 | 4.327612  | 0.082635  |
| H | -3.865382 | 3.915417  | -1.881208 |
| H | -3.933279 | 4.934248  | 0.384036  |
| H | -0.276147 | 0.019770  | 0.310682  |
| N | -2.254001 | -2.629223 | 0.343852  |
| C | -1.222115 | -1.808094 | -0.005602 |
| N | -0.372766 | -2.171609 | -0.967381 |
| C | -0.506235 | -3.411448 | -1.710798 |
| C | -1.090383 | -4.488216 | -0.804994 |
| C | -2.396190 | -3.979473 | -0.206759 |
| C | -3.330092 | -0.701596 | 1.465662  |
| C | -1.910437 | -0.202011 | 1.699812  |
| N | -1.056891 | -0.635859 | 0.606469  |
| C | -3.303417 | -2.213438 | 1.279250  |
| H | 0.487678  | -3.684822 | -2.068558 |
| H | -1.142470 | -3.271535 | -2.595701 |
| H | -0.377133 | -4.716492 | -0.007416 |
| H | -1.277378 | -5.411179 | -1.359881 |
| H | -3.191539 | -3.981745 | -0.964822 |
| H | -2.726668 | -4.637339 | 0.604079  |
| H | -4.262018 | -2.567771 | 0.885042  |
| H | -3.147932 | -2.716805 | 2.243245  |
| H | -3.738318 | -0.217784 | 0.573692  |

|   |           |           |           |
|---|-----------|-----------|-----------|
| H | -3.979696 | -0.448549 | 2.307443  |
| H | -1.529209 | -0.572190 | 2.661900  |
| H | -1.873061 | 0.887314  | 1.728871  |
| H | 0.459349  | -1.562020 | -1.181549 |

57 atoms

$\epsilon$ -CL, structure I2 in vacuum

|   |           |           |           |
|---|-----------|-----------|-----------|
| O | -1.239299 | 1.294519  | -1.550937 |
| O | -1.647111 | 1.470656  | 0.645702  |
| C | -1.919493 | 0.728236  | -0.515525 |
| C | -3.411288 | 0.649048  | -0.884715 |
| H | -3.877551 | -0.181222 | -0.344324 |
| H | -3.452775 | 0.400929  | -1.946927 |
| C | -4.195711 | 1.944832  | -0.623698 |
| H | -3.583016 | 2.803960  | -0.913771 |
| H | -5.071404 | 1.955480  | -1.281667 |
| C | -4.687664 | 2.090835  | 0.825424  |
| H | -5.284247 | 1.203895  | 1.079273  |
| H | -5.376673 | 2.941012  | 0.886728  |
| C | -3.586780 | 2.275002  | 1.877466  |
| H | -3.133558 | 3.267206  | 1.772309  |
| H | -4.031852 | 2.239564  | 2.880192  |
| C | -2.456616 | 1.250722  | 1.803339  |
| H | -2.827768 | 0.220944  | 1.825927  |
| H | -1.785664 | 1.371896  | 2.657815  |
| O | -1.393326 | -0.598727 | -0.196111 |
| C | -1.375328 | -1.541907 | -1.273855 |
| C | -0.737787 | -2.819198 | -0.786647 |
| H | -0.822406 | -1.125890 | -2.119898 |
| H | -2.400905 | -1.742252 | -1.609087 |
| C | -1.349229 | -3.575761 | 0.219524  |
| C | 0.470884  | -3.268029 | -1.322220 |
| C | -0.769487 | -4.756382 | 0.673508  |
| H | -2.285168 | -3.231479 | 0.648803  |
| C | 1.052828  | -4.453983 | -0.874348 |
| H | 0.962852  | -2.682188 | -2.092582 |
| H | -1.257567 | -5.334358 | 1.452270  |
| C | 0.434091  | -5.200723 | 0.124728  |
| H | 1.990141  | -4.791978 | -1.305430 |
| H | 0.884488  | -6.124495 | 0.474355  |
| H | 0.537740  | -0.196894 | 0.321704  |
| N | 3.397522  | 1.322070  | 0.258576  |
| C | 2.099319  | 1.016133  | -0.102028 |
| N | 1.407379  | 1.663209  | -0.992175 |
| C | 2.045503  | 2.761594  | -1.695845 |
| C | 3.017338  | 3.521734  | -0.795303 |

|   |           |           |           |
|---|-----------|-----------|-----------|
| C | 4.038867  | 2.542071  | -0.230582 |
| C | 3.589493  | -0.812934 | 1.507436  |
| C | 2.081516  | -0.698337 | 1.686396  |
| N | 1.530020  | -0.077775 | 0.499412  |
| C | 4.166202  | 0.573895  | 1.250520  |
| H | 1.263246  | 3.431210  | -2.064914 |
| H | 2.580673  | 2.394416  | -2.586494 |
| H | 2.456405  | 3.984800  | 0.023117  |
| H | 3.532116  | 4.320869  | -1.337659 |
| H | 4.786914  | 2.284584  | -0.994258 |
| H | 4.584842  | 2.998656  | 0.603983  |
| H | 5.200060  | 0.494337  | 0.893103  |
| H | 4.203964  | 1.143266  | 2.192582  |
| H | 3.796915  | -1.471957 | 0.659350  |
| H | 4.061688  | -1.246192 | 2.393689  |
| H | 1.853900  | -0.126614 | 2.601065  |
| H | 1.622427  | -1.682923 | 1.796076  |
| H | -0.274333 | 1.436213  | -1.296703 |

57 atoms

$\epsilon$ -CL, structure TS23 in vacuum

|   |           |           |           |
|---|-----------|-----------|-----------|
| O | 1.265493  | -0.906874 | -1.622981 |
| O | 1.556172  | -1.454585 | 0.536566  |
| C | 1.979560  | -0.590728 | -0.501421 |
| C | 3.477614  | -0.688738 | -0.833895 |
| H | 4.042344  | -0.049438 | -0.147854 |
| H | 3.594733  | -0.261099 | -1.831828 |
| C | 4.045482  | -2.116215 | -0.805694 |
| H | 3.315976  | -2.805070 | -1.242625 |
| H | 4.928009  | -2.151412 | -1.453540 |
| C | 4.465726  | -2.583739 | 0.596846  |
| H | 5.190670  | -1.863043 | 0.999074  |
| H | 5.004970  | -3.534256 | 0.513263  |
| C | 3.319886  | -2.757706 | 1.601506  |
| H | 2.714333  | -3.629540 | 1.329059  |
| H | 3.736731  | -2.965329 | 2.595421  |
| C | 2.372576  | -1.564495 | 1.706872  |
| H | 2.901960  | -0.625339 | 1.896518  |
| H | 1.676855  | -1.716755 | 2.536694  |
| O | 1.636271  | 0.716114  | 0.005701  |
| C | 1.831017  | 1.810363  | -0.896291 |
| C | 0.955146  | 2.963697  | -0.475812 |
| H | 1.570878  | 1.485527  | -1.908328 |
| H | 2.884031  | 2.119064  | -0.895916 |
| C | 1.507646  | 4.166058  | -0.032786 |
| C | -0.438159 | 2.840104  | -0.532594 |

|   |           |           |           |
|---|-----------|-----------|-----------|
| C | 0.690049  | 5.233115  | 0.340207  |
| H | 2.587801  | 4.270850  | 0.022741  |
| C | -1.255749 | 3.901493  | -0.158232 |
| H | -0.873837 | 1.904247  | -0.867585 |
| H | 1.135467  | 6.162794  | 0.680937  |
| C | -0.694214 | 5.102584  | 0.278015  |
| H | -2.335104 | 3.794695  | -0.210589 |
| H | -1.333804 | 5.930918  | 0.567153  |
| H | -0.407838 | -0.285871 | 0.846632  |
| N | -3.396957 | -1.254694 | 0.112911  |
| C | -2.083051 | -0.883825 | -0.087248 |
| N | -1.465303 | -0.922889 | -1.231226 |
| C | -2.220453 | -1.336411 | -2.402283 |
| C | -3.245979 | -2.416075 | -2.061415 |
| C | -4.159651 | -1.901024 | -0.955622 |
| C | -3.356061 | -0.287065 | 2.398902  |
| C | -1.863503 | -0.588268 | 2.359552  |
| N | -1.402783 | -0.392987 | 0.999900  |
| C | -4.073686 | -1.194833 | 1.407080  |
| H | -1.514560 | -1.702077 | -3.153348 |
| H | -2.732802 | -0.473737 | -2.857095 |
| H | -2.719369 | -3.312937 | -1.719060 |
| H | -3.844224 | -2.696718 | -2.933702 |
| H | -4.894335 | -1.192014 | -1.363111 |
| H | -4.729730 | -2.727784 | -0.514956 |
| H | -5.098224 | -0.840310 | 1.241928  |
| H | -4.157420 | -2.210875 | 1.823104  |
| H | -3.511733 | 0.762374  | 2.132898  |
| H | -3.766117 | -0.445015 | 3.400268  |
| H | -1.674496 | -1.611221 | 2.724144  |
| H | -1.309385 | 0.095156  | 3.006700  |
| H | 0.284854  | -0.918780 | -1.416487 |

57 atoms

$\epsilon$ -CL, structure I3 in vacuum

|   |           |           |           |
|---|-----------|-----------|-----------|
| O | -0.824112 | -0.887103 | 1.662637  |
| O | -0.930694 | -1.892032 | -0.348091 |
| C | -1.647647 | -1.101224 | 0.595140  |
| C | -2.935310 | -1.780512 | 1.098231  |
| H | -3.758115 | -1.535504 | 0.419110  |
| H | -3.168193 | -1.312652 | 2.057138  |
| C | -2.838391 | -3.304762 | 1.266036  |
| H | -1.862913 | -3.563844 | 1.689124  |
| H | -3.585949 | -3.620040 | 2.001984  |
| C | -3.095184 | -4.085602 | -0.033894 |
| H | -4.073730 | -3.782855 | -0.430362 |

|   |           |           |           |
|---|-----------|-----------|-----------|
| H | -3.185056 | -5.152765 | 0.199056  |
| C | -2.034416 | -3.913321 | -1.129342 |
| H | -1.113278 | -4.431610 | -0.838540 |
| H | -2.383438 | -4.393455 | -2.052480 |
| C | -1.665247 | -2.464704 | -1.437789 |
| H | -2.536271 | -1.846781 | -1.671404 |
| H | -1.000841 | -2.420245 | -2.305457 |
| O | -1.938951 | 0.100123  | -0.128596 |
| C | -2.523329 | 1.163783  | 0.616486  |
| C | -2.207307 | 2.481257  | -0.051792 |
| H | -2.117855 | 1.154021  | 1.634323  |
| H | -3.611529 | 1.033126  | 0.688426  |
| C | -3.169811 | 3.489685  | -0.126903 |
| C | -0.931006 | 2.723560  | -0.570671 |
| C | -2.865645 | 4.724917  | -0.697865 |
| H | -4.169142 | 3.308972  | 0.260683  |
| C | -0.628637 | 3.954015  | -1.147082 |
| H | -0.187099 | 1.936268  | -0.523352 |
| H | -3.626296 | 5.497973  | -0.750173 |
| C | -1.592856 | 4.960230  | -1.210822 |
| H | 0.364577  | 4.129243  | -1.549948 |
| H | -1.354526 | 5.918510  | -1.662097 |
| H | 0.947226  | -1.318947 | -0.686755 |
| N | 3.758962  | 0.081849  | 0.085007  |
| C | 2.413800  | -0.216557 | 0.145871  |
| N | 1.588858  | 0.247517  | 1.038225  |
| C | 2.094408  | 1.203600  | 2.009066  |
| C | 3.536579  | 0.894352  | 2.407190  |
| C | 4.400909  | 0.849743  | 1.152441  |
| C | 3.930153  | -1.001254 | -2.143523 |
| C | 2.763193  | -1.858115 | -1.668299 |
| N | 1.911541  | -1.034782 | -0.834657 |
| C | 4.667742  | -0.446618 | -0.930376 |
| H | 1.441309  | 1.178207  | 2.885890  |
| H | 2.032585  | 2.228427  | 1.610924  |
| H | 3.567422  | -0.076503 | 2.912658  |
| H | 3.933658  | 1.640952  | 3.101737  |
| H | 4.612871  | 1.867617  | 0.795564  |
| H | 5.369265  | 0.384132  | 1.371888  |
| H | 5.346814  | 0.358366  | -1.236195 |
| H | 5.295907  | -1.232731 | -0.483494 |
| H | 3.541073  | -0.182831 | -2.756062 |
| H | 4.624491  | -1.581239 | -2.757906 |
| H | 3.139494  | -2.747531 | -1.136817 |
| H | 2.171744  | -2.215174 | -2.514583 |
| H | 0.048330  | -0.485916 | 1.366881  |



57 atoms

$\epsilon$ -CL, structure TS3r in vacuum

|   |           |           |           |
|---|-----------|-----------|-----------|
| O | -0.546635 | 1.351883  | -1.708405 |
| O | -0.686858 | 1.853243  | 0.480136  |
| C | -1.420569 | 1.387487  | -0.663084 |
| C | -2.603419 | 2.294705  | -1.030600 |
| H | -3.470824 | 1.996484  | -0.435753 |
| H | -2.840523 | 2.046888  | -2.068141 |
| C | -2.344370 | 3.800461  | -0.881342 |
| H | -1.326447 | 4.031319  | -1.211238 |
| H | -3.015530 | 4.339847  | -1.558530 |
| C | -2.588214 | 4.322699  | 0.544000  |
| H | -3.615246 | 4.064210  | 0.834875  |
| H | -2.545139 | 5.417934  | 0.541090  |
| C | -1.618160 | 3.799924  | 1.611779  |
| H | -0.628468 | 4.248251  | 1.466518  |
| H | -1.962965 | 4.120534  | 2.603312  |
| C | -1.431781 | 2.284103  | 1.625421  |
| H | -2.380092 | 1.742912  | 1.688850  |
| H | -0.838652 | 1.991421  | 2.497162  |
| O | -1.954757 | 0.106681  | -0.294835 |
| C | -1.658032 | -1.020688 | -1.122424 |
| C | -2.169005 | -2.254029 | -0.420169 |
| H | -0.579212 | -1.101799 | -1.281944 |
| H | -2.132302 | -0.912596 | -2.104488 |
| C | -3.192078 | -3.029077 | -0.966938 |
| C | -1.611586 | -2.642788 | 0.803557  |
| C | -3.647092 | -4.175329 | -0.314392 |
| H | -3.640392 | -2.733344 | -1.911352 |
| C | -2.064965 | -3.782023 | 1.459740  |
| H | -0.818430 | -2.040429 | 1.236014  |
| H | -4.443445 | -4.767811 | -0.754411 |
| C | -3.084935 | -4.553979 | 0.901020  |
| H | -1.622483 | -4.072669 | 2.407926  |
| H | -3.438099 | -5.444185 | 1.412356  |
| H | 0.921256  | 0.776653  | 0.887444  |
| N | 3.741643  | -0.546404 | 0.041685  |
| C | 2.460870  | -0.057043 | -0.098887 |
| N | 1.843018  | 0.094853  | -1.232829 |
| C | 2.517163  | -0.331155 | -2.448473 |
| C | 4.024815  | -0.100311 | -2.369917 |
| C | 4.571558  | -0.806967 | -1.135210 |
| C | 3.453209  | -0.687856 | 2.504217  |
| C | 2.463851  | 0.454877  | 2.316818  |
| N | 1.778148  | 0.254185  | 1.054487  |
| C | 4.420273  | -0.707937 | 1.326446  |
| H | 2.087254  | 0.220706  | -3.289031 |

|   |          |           |           |
|---|----------|-----------|-----------|
| H | 2.318812 | -1.396206 | -2.646702 |
| H | 4.219814 | 0.974763  | -2.297675 |
| H | 4.536782 | -0.469391 | -3.263751 |
| H | 4.634969 | -1.890514 | -1.308276 |
| H | 5.588789 | -0.461545 | -0.916204 |
| H | 4.972325 | -1.655103 | 1.306255  |
| H | 5.170249 | 0.089310  | 1.444437  |
| H | 2.900290 | -1.630190 | 2.555383  |
| H | 4.015573 | -0.576794 | 3.435418  |
| H | 2.991497 | 1.421733  | 2.359717  |
| H | 1.717006 | 0.458867  | 3.114082  |
| H | 0.324776 | 0.927387  | -1.451269 |

57 atoms

$\epsilon$ -CL, structure I3r in vacuum

|   |           |           |           |
|---|-----------|-----------|-----------|
| O | 0.197167  | 1.018950  | 1.793519  |
| O | 0.310574  | 1.684698  | -0.352979 |
| C | 1.081640  | 1.448969  | 0.845090  |
| C | 1.805746  | 2.698941  | 1.362106  |
| H | 2.790311  | 2.758457  | 0.890343  |
| H | 1.978964  | 2.508338  | 2.422965  |
| C | 1.042322  | 4.015642  | 1.167441  |
| H | -0.020474 | 3.858147  | 1.377800  |
| H | 1.397747  | 4.733770  | 1.914178  |
| C | 1.236772  | 4.643294  | -0.223109 |
| H | 2.314113  | 4.759095  | -0.401735 |
| H | 0.823654  | 5.658537  | -0.222230 |
| C | 0.615498  | 3.866578  | -1.391674 |
| H | -0.476984 | 3.953481  | -1.354892 |
| H | 0.930756  | 4.321547  | -2.339440 |
| C | 0.957831  | 2.378943  | -1.425113 |
| H | 2.035682  | 2.195673  | -1.390924 |
| H | 0.585249  | 1.926131  | -2.349146 |
| O | 2.109815  | 0.516933  | 0.545208  |
| C | 1.687662  | -0.819847 | 0.294630  |
| C | 2.876979  | -1.662373 | -0.098730 |
| H | 0.931663  | -0.839641 | -0.497571 |
| H | 1.219647  | -1.227407 | 1.198088  |
| C | 2.686185  | -2.810529 | -0.873205 |
| C | 4.169211  | -1.347904 | 0.329161  |
| C | 3.759381  | -3.633359 | -1.206449 |
| H | 1.687654  | -3.062058 | -1.221542 |
| C | 5.245052  | -2.166100 | -0.009272 |
| H | 4.324477  | -0.452849 | 0.919344  |
| H | 3.592543  | -4.520328 | -1.810194 |
| C | 5.045136  | -3.312772 | -0.775266 |

|   |           |           |           |
|---|-----------|-----------|-----------|
| H | 6.244112  | -1.906062 | 0.327541  |
| H | 5.884539  | -3.949005 | -1.038125 |
| H | -1.380460 | 0.756810  | -0.780418 |
| N | -3.806208 | -1.258221 | -0.080987 |
| C | -2.602844 | -0.599604 | 0.058059  |
| N | -1.812065 | -0.701281 | 1.084107  |
| C | -2.182399 | -1.617203 | 2.150204  |
| C | -3.695755 | -1.666568 | 2.352497  |
| C | -4.363356 | -2.029688 | 1.031101  |
| C | -3.963875 | -0.538792 | -2.452888 |
| C | -3.121153 | 0.650641  | -2.009737 |
| N | -2.197686 | 0.191043  | -0.991415 |
| C | -4.684287 | -1.118658 | -1.241243 |
| H | -1.682813 | -1.293273 | 3.067403  |
| H | -1.806791 | -2.630502 | 1.936866  |
| H | -4.044047 | -0.683239 | 2.685202  |
| H | -3.977514 | -2.393610 | 3.120161  |
| H | -4.251028 | -3.103599 | 0.825708  |
| H | -5.440038 | -1.828070 | 1.079192  |
| H | -5.094570 | -2.106539 | -1.482258 |
| H | -5.541061 | -0.480307 | -0.975396 |
| H | -3.306797 | -1.291583 | -2.897920 |
| H | -4.698874 | -0.245128 | -3.207424 |
| H | -3.774275 | 1.462723  | -1.650584 |
| H | -2.540110 | 1.049793  | -2.844396 |
| H | -0.508506 | 0.407615  | 1.429868  |

57 atoms

$\epsilon$ -CL, structure TS3r2 in vacuum

|   |           |          |           |
|---|-----------|----------|-----------|
| O | -0.315615 | 0.668220 | -1.484586 |
| O | -0.160068 | 1.117972 | 0.717505  |
| C | -0.970794 | 1.300178 | -0.459461 |
| C | -1.232311 | 2.776377 | -0.799056 |
| H | -2.096209 | 3.134079 | -0.231402 |
| H | -1.530557 | 2.770722 | -1.849099 |
| C | -0.028361 | 3.702719 | -0.583314 |
| H | 0.890166  | 3.188099 | -0.885757 |
| H | -0.126978 | 4.565565 | -1.250419 |
| C | 0.092470  | 4.226334 | 0.857188  |
| H | -0.849639 | 4.723621 | 1.123386  |
| H | 0.863251  | 5.004514 | 0.897538  |
| C | 0.415303  | 3.164229 | 1.916346  |
| H | 1.455185  | 2.834529 | 1.807053  |
| H | 0.334317  | 3.610400 | 2.915791  |
| C | -0.466110 | 1.918046 | 1.864967  |
| H | -1.533448 | 2.157637 | 1.879830  |

|   |           |           |           |
|---|-----------|-----------|-----------|
| H | -0.268877 | 1.283295  | 2.734168  |
| O | -2.250657 | 0.741561  | -0.239495 |
| C | -2.293747 | -0.678635 | -0.119516 |
| C | -3.729960 | -1.142290 | -0.107569 |
| H | -1.787727 | -0.996011 | 0.800083  |
| H | -1.753634 | -1.121702 | -0.962312 |
| C | -4.080934 | -2.306427 | 0.581661  |
| C | -4.721879 | -0.454176 | -0.811596 |
| C | -5.390066 | -2.782407 | 0.560196  |
| H | -3.322845 | -2.846350 | 1.143441  |
| C | -6.032934 | -0.924141 | -0.827996 |
| H | -4.458478 | 0.457024  | -1.335159 |
| H | -5.644118 | -3.688327 | 1.102234  |
| C | -6.372360 | -2.090986 | -0.145404 |
| H | -6.793083 | -0.376088 | -1.376624 |
| H | -7.394745 | -2.455726 | -0.159198 |
| H | 1.256917  | -0.248753 | 0.984450  |
| N | 4.030702  | -1.417459 | -0.167942 |
| C | 2.783345  | -0.829240 | -0.171817 |
| N | 2.211192  | -0.301206 | -1.210662 |
| C | 2.896118  | -0.377714 | -2.489865 |
| C | 4.411950  | -0.282343 | -2.326841 |
| C | 4.879152  | -1.363647 | -1.358978 |
| C | 3.647945  | -2.289454 | 2.123677  |
| C | 2.719677  | -1.092667 | 2.286914  |
| N | 2.079592  | -0.843090 | 1.010661  |
| C | 4.657032  | -1.992503 | 1.020508  |
| H | 2.525186  | 0.432059  | -3.124143 |
| H | 2.639544  | -1.314718 | -3.008465 |
| H | 4.668505  | 0.705079  | -1.928705 |
| H | 4.928654  | -0.395939 | -3.284666 |
| H | 4.884092  | -2.345669 | -1.852713 |
| H | 5.908049  | -1.167353 | -1.034988 |
| H | 5.173661  | -2.913044 | 0.724279  |
| H | 5.431493  | -1.305852 | 1.396565  |
| H | 3.050602  | -3.167504 | 1.861658  |
| H | 4.178671  | -2.508422 | 3.054341  |
| H | 3.290005  | -0.222191 | 2.651489  |
| H | 1.941961  | -1.301067 | 3.025693  |
| H | 0.599171  | 0.330825  | -1.250405 |

57 atoms

$\epsilon$ -CL, structure I3r2 in vacuum

|   |          |          |           |
|---|----------|----------|-----------|
| O | 0.280094 | 0.249595 | 1.368137  |
| O | 0.368795 | 0.446976 | -0.867716 |
| C | 0.924040 | 0.942204 | 0.374885  |

|   |           |           |           |
|---|-----------|-----------|-----------|
| C | 0.808886  | 2.473174  | 0.513144  |
| H | 1.680719  | 2.936235  | 0.041216  |
| H | 0.901453  | 2.666834  | 1.583786  |
| C | -0.479839 | 3.096054  | -0.043376 |
| H | -1.337599 | 2.455275  | 0.187259  |
| H | -0.656438 | 4.042993  | 0.478376  |
| C | -0.417619 | 3.391281  | -1.551158 |
| H | 0.457552  | 4.026170  | -1.743748 |
| H | -1.290039 | 3.989353  | -1.838858 |
| C | -0.350421 | 2.156833  | -2.459437 |
| H | -1.318043 | 1.641329  | -2.456422 |
| H | -0.172890 | 2.476099  | -3.494387 |
| C | 0.717148  | 1.134736  | -2.074106 |
| H | 1.708621  | 1.586692  | -1.972526 |
| H | 0.794830  | 0.363682  | -2.846199 |
| O | 2.298156  | 0.665418  | 0.424120  |
| C | 2.649312  | -0.714161 | 0.533260  |
| C | 4.146074  | -0.866552 | 0.406411  |
| H | 2.141392  | -1.290367 | -0.247030 |
| H | 2.304349  | -1.097479 | 1.498264  |
| C | 4.682883  | -2.108428 | 0.052132  |
| C | 5.019347  | 0.190337  | 0.673068  |
| C | 6.060370  | -2.294832 | -0.026877 |
| H | 4.015571  | -2.938507 | -0.166365 |
| C | 6.398493  | 0.007060  | 0.588412  |
| H | 4.609613  | 1.156946  | 0.939318  |
| H | 6.458613  | -3.265991 | -0.304872 |
| C | 6.925015  | -1.234837 | 0.240912  |
| H | 7.064054  | 0.839725  | 0.795634  |
| H | 7.999419  | -1.375634 | 0.175359  |
| H | -1.268340 | -0.686063 | -0.776485 |
| N | -4.293728 | -1.090551 | 0.297110  |
| C | -2.985549 | -0.655061 | 0.279431  |
| N | -2.451512 | 0.132593  | 1.168213  |
| C | -3.263373 | 0.534039  | 2.304201  |
| C | -4.728291 | 0.722957  | 1.914579  |
| C | -5.243301 | -0.561831 | 1.276534  |
| C | -3.792435 | -2.759301 | -1.466358 |
| C | -2.704730 | -1.788724 | -1.908852 |
| N | -2.187209 | -1.116500 | -0.735326 |
| C | -4.863973 | -1.991240 | -0.702209 |
| H | -2.852168 | 1.463213  | 2.708986  |
| H | -3.191702 | -0.209842 | 3.113352  |
| H | -4.805776 | 1.548166  | 1.198848  |
| H | -5.346736 | 0.978362  | 2.780393  |
| H | -5.438751 | -1.321712 | 2.046403  |
| H | -6.195270 | -0.378972 | 0.763901  |

|   |           |           |           |
|---|-----------|-----------|-----------|
| H | -5.534762 | -2.689702 | -0.188362 |
| H | -5.487544 | -1.416905 | -1.404904 |
| H | -3.347573 | -3.524347 | -0.823372 |
| H | -4.245391 | -3.262449 | -2.325095 |
| H | -3.112960 | -1.082699 | -2.650578 |
| H | -1.879839 | -2.319238 | -2.390339 |
| H | -0.715799 | 0.271869  | 1.264549  |

57 atoms

$\epsilon$ -CL, structure TS34 in vacuum

|   |           |           |           |
|---|-----------|-----------|-----------|
| O | -0.147106 | 0.531611  | -1.646804 |
| O | -0.176173 | 0.985753  | 0.784714  |
| C | -0.922041 | 1.219360  | -0.951747 |
| C | -0.968795 | 2.737985  | -1.074830 |
| H | -1.799444 | 3.126299  | -0.480918 |
| H | -1.237636 | 2.911984  | -2.123284 |
| C | 0.334360  | 3.480546  | -0.739468 |
| H | 1.186247  | 2.816808  | -0.916942 |
| H | 0.449064  | 4.315058  | -1.440843 |
| C | 0.387626  | 4.065965  | 0.683060  |
| H | -0.525356 | 4.655710  | 0.843276  |
| H | 1.214219  | 4.786108  | 0.734400  |
| C | 0.544480  | 3.066415  | 1.837243  |
| H | 1.560813  | 2.650243  | 1.823218  |
| H | 0.447242  | 3.611028  | 2.787268  |
| C | -0.437661 | 1.884678  | 1.819190  |
| H | -1.473998 | 2.258486  | 1.756381  |
| H | -0.375127 | 1.366602  | 2.793908  |
| O | -2.203404 | 0.763543  | -0.706385 |
| C | -2.342428 | -0.651809 | -0.686662 |
| C | -3.768412 | -1.026973 | -0.364619 |
| H | -1.659819 | -1.051526 | 0.072151  |
| H | -2.039648 | -1.069299 | -1.651280 |
| C | -4.226192 | -2.311379 | -0.677143 |
| C | -4.642338 | -0.141010 | 0.269309  |
| C | -5.521115 | -2.707762 | -0.354356 |
| H | -3.561879 | -3.008052 | -1.182837 |
| C | -5.941713 | -0.533486 | 0.586910  |
| H | -4.297999 | 0.859201  | 0.501092  |
| H | -5.858509 | -3.708633 | -0.606953 |
| C | -6.386081 | -1.817466 | 0.280150  |
| H | -6.609961 | 0.169350  | 1.075730  |
| H | -7.398647 | -2.121045 | 0.527690  |
| H | 1.038801  | 0.072932  | 0.905275  |
| N | 3.902401  | -1.415435 | 0.130429  |
| C | 2.729432  | -0.735377 | -0.005037 |

|   |          |           |           |
|---|----------|-----------|-----------|
| N | 2.385242 | -0.215419 | -1.190104 |
| C | 3.148872 | -0.452857 | -2.402724 |
| C | 4.630702 | -0.515987 | -2.058270 |
| C | 4.851178 | -1.567437 | -0.976936 |
| C | 3.057776 | -2.319184 | 2.269123  |
| C | 2.218400 | -1.051383 | 2.360871  |
| N | 1.908409 | -0.565375 | 1.026988  |
| C | 4.278001 | -2.052072 | 1.395904  |
| H | 2.933436 | 0.363201  | -3.094264 |
| H | 2.829524 | -1.383637 | -2.891958 |
| H | 4.962378 | 0.463019  | -1.699639 |
| H | 5.226476 | -0.766958 | -2.939343 |
| H | 4.761324 | -2.577724 | -1.398870 |
| H | 5.861256 | -1.481775 | -0.563781 |
| H | 4.787556 | -2.990625 | 1.156641  |
| H | 5.001962 | -1.418925 | 1.926574  |
| H | 2.458030 | -3.123100 | 1.831626  |
| H | 3.379699 | -2.646870 | 3.260793  |
| H | 2.750946 | -0.285085 | 2.941169  |
| H | 1.272330 | -1.240014 | 2.871837  |
| H | 1.413517 | 0.148982  | -1.301300 |

57 atoms

$\epsilon$ -CL, structure I4 in vacuum

|   |           |           |           |
|---|-----------|-----------|-----------|
| O | 0.008236  | 1.684999  | -1.615703 |
| O | -0.504028 | 1.249286  | 1.419282  |
| C | -1.062616 | 2.012990  | -1.147113 |
| C | -1.411934 | 3.392120  | -0.634972 |
| H | -2.052454 | 3.269388  | 0.239902  |
| H | -2.046921 | 3.841853  | -1.408830 |
| C | -0.207038 | 4.300593  | -0.352079 |
| H | 0.618187  | 4.007293  | -1.007878 |
| H | -0.477825 | 5.320128  | -0.647030 |
| C | 0.288176  | 4.374357  | 1.104247  |
| H | -0.557188 | 4.623590  | 1.760386  |
| H | 0.957474  | 5.241410  | 1.155191  |
| C | 1.048695  | 3.170990  | 1.698099  |
| H | 1.714103  | 2.729843  | 0.946877  |
| H | 1.704176  | 3.556194  | 2.491066  |
| C | 0.206064  | 2.060133  | 2.337702  |
| H | -0.532402 | 2.508023  | 3.013804  |
| H | 0.866831  | 1.435226  | 2.955478  |
| O | -2.132315 | 1.207226  | -1.104505 |
| C | -1.934945 | -0.186893 | -1.443595 |
| C | -3.016199 | -0.992248 | -0.774962 |
| H | -0.945208 | -0.487707 | -1.096220 |

|   |           |           |           |
|---|-----------|-----------|-----------|
| H | -1.966039 | -0.292941 | -2.531146 |
| C | -3.846152 | -1.834713 | -1.514844 |
| C | -3.179505 | -0.920172 | 0.614558  |
| C | -4.821577 | -2.606128 | -0.882616 |
| H | -3.733307 | -1.889087 | -2.594309 |
| C | -4.157532 | -1.684030 | 1.243422  |
| H | -2.539268 | -0.257718 | 1.189420  |
| H | -5.460927 | -3.257433 | -1.470495 |
| C | -4.979493 | -2.531062 | 0.497994  |
| H | -4.279936 | -1.619785 | 2.320324  |
| H | -5.740914 | -3.126229 | 0.992609  |
| H | 0.095422  | 0.519055  | 1.121166  |
| N | 3.203017  | -1.882900 | 0.082370  |
| C | 2.220166  | -0.916507 | 0.036391  |
| N | 2.406624  | 0.122724  | -0.846388 |
| C | 3.355785  | 0.040228  | -1.940674 |
| C | 4.661024  | -0.521470 | -1.394551 |
| C | 4.391077  | -1.884867 | -0.769974 |
| C | 1.577526  | -3.278660 | 1.304472  |
| C | 0.997109  | -1.949007 | 1.779788  |
| N | 1.156979  | -0.898756 | 0.786383  |
| C | 3.036900  | -3.072345 | 0.918182  |
| H | 3.495712  | 1.045488  | -2.343553 |
| H | 2.989091  | -0.591872 | -2.765779 |
| H | 5.057379  | 0.166989  | -0.642475 |
| H | 5.409803  | -0.623774 | -2.184850 |
| H | 4.272689  | -2.642080 | -1.560420 |
| H | 5.247376  | -2.199693 | -0.161762 |
| H | 3.409665  | -3.936351 | 0.355649  |
| H | 3.664611  | -2.984142 | 1.816352  |
| H | 1.010635  | -3.628455 | 0.435351  |
| H | 1.504098  | -4.049510 | 2.077588  |
| H | 1.478031  | -1.659547 | 2.728064  |
| H | -0.069131 | -2.052728 | 1.998436  |
| H | 1.571558  | 0.675156  | -1.008924 |

57 atoms

$\epsilon$ -CL, structure I5 in vacuum

|   |           |           |           |
|---|-----------|-----------|-----------|
| O | -4.153405 | 1.386211  | -1.764408 |
| O | 3.168674  | -0.805456 | -1.444127 |
| C | -4.181539 | 0.550517  | -0.895482 |
| C | -2.988454 | -0.211526 | -0.356551 |
| H | -3.226637 | -1.280269 | -0.395505 |
| H | -2.903346 | 0.022935  | 0.711406  |
| C | -1.685454 | 0.096409  | -1.092325 |
| H | -1.801870 | -0.150110 | -2.152888 |



|   |            |           |           |
|---|------------|-----------|-----------|
| H | -1.498977  | 1.174515  | -1.059886 |
| C | -0.486380  | -0.659212 | -0.511416 |
| H | -0.687575  | -1.738456 | -0.537719 |
| H | -0.373832  | -0.401530 | 0.550417  |
| C | 0.822695   | -0.367873 | -1.249913 |
| H | 0.732222   | -0.651302 | -2.304634 |
| H | 1.028200   | 0.709281  | -1.238162 |
| C | 2.021509   | -1.099040 | -0.663180 |
| H | 1.825506   | -2.182552 | -0.660049 |
| H | 2.173688   | -0.796675 | 0.384627  |
| O | -5.315670  | 0.173453  | -0.261597 |
| C | -6.530085  | 0.848527  | -0.686765 |
| C | -7.671420  | 0.307976  | 0.126480  |
| H | -6.669272  | 0.672031  | -1.755094 |
| H | -6.397663  | 1.922758  | -0.543169 |
| C | -7.999004  | 0.880105  | 1.358888  |
| C | -8.410082  | -0.788771 | -0.325398 |
| C | -9.043929  | 0.368999  | 2.123947  |
| H | -7.430342  | 1.731941  | 1.720699  |
| C | -9.456368  | -1.303107 | 0.436202  |
| H | -8.163088  | -1.242613 | -1.280847 |
| H | -9.289661  | 0.824964  | 3.077722  |
| C | -9.775303  | -0.724279 | 1.663017  |
| H | -10.023947 | -2.153301 | 0.071557  |
| H | -10.592431 | -1.121824 | 2.256519  |
| H | 3.960394   | -1.207489 | -1.006745 |
| N | 7.138257   | 0.268183  | 0.776551  |
| C | 5.934371   | -0.045165 | 0.179102  |
| N | 5.137317   | 1.011015  | -0.204675 |
| C | 5.659939   | 2.352307  | -0.370023 |
| C | 6.523114   | 2.673682  | 0.843439  |
| C | 7.630502   | 1.632484  | 0.958154  |
| C | 7.773624   | -2.085635 | 0.387088  |
| C | 6.273834   | -2.362299 | 0.484983  |
| N | 5.484660   | -1.249617 | -0.011649 |
| C | 8.090355   | -0.787789 | 1.121272  |
| H | 4.815566   | 3.041514  | -0.443110 |
| H | 6.251025   | 2.463584  | -1.293841 |
| H | 5.894950   | 2.656750  | 1.738805  |
| H | 6.967041   | 3.669794  | 0.762106  |
| H | 8.416021   | 1.839626  | 0.214720  |
| H | 8.108806   | 1.696443  | 1.942835  |
| H | 9.096288   | -0.438023 | 0.860403  |
| H | 8.083709   | -0.949671 | 2.208590  |
| H | 8.050866   | -1.989657 | -0.667949 |
| H | 8.364729   | -2.903467 | 0.810628  |
| H | 6.010129   | -2.586946 | 1.531042  |

|   |          |           |           |
|---|----------|-----------|-----------|
| H | 6.013052 | -3.254253 | -0.092042 |
| H | 4.336462 | 0.723420  | -0.760065 |

39 atoms

complex BnO-TBD in toluene

|   |           |           |           |
|---|-----------|-----------|-----------|
| N | -3.208356 | 0.586107  | 0.216068  |
| C | -1.991466 | -0.004781 | -0.030156 |
| N | -1.975904 | -1.378001 | -0.155718 |
| C | -3.178630 | -2.139609 | -0.441518 |
| C | -4.280639 | -1.639517 | 0.483110  |
| C | -4.476374 | -0.143811 | 0.266753  |
| C | -2.125393 | 2.726365  | -0.372715 |
| C | -0.843577 | 2.059306  | 0.123114  |
| N | -0.854440 | 0.624739  | -0.112941 |
| C | -3.325408 | 2.045162  | 0.274451  |
| H | -2.964653 | -3.195171 | -0.261125 |
| H | -3.493867 | -2.044545 | -1.492549 |
| H | -3.991883 | -1.836874 | 1.519562  |
| H | -5.222295 | -2.160595 | 0.291693  |
| H | -5.032705 | 0.030232  | -0.666331 |
| H | -5.080949 | 0.279701  | 1.076450  |
| H | -4.249849 | 2.331243  | -0.239281 |
| H | -3.431283 | 2.363254  | 1.320615  |
| H | -2.185591 | 2.624052  | -1.461356 |
| H | -2.138363 | 3.795335  | -0.140548 |
| H | -0.710984 | 2.272211  | 1.195548  |
| H | 0.029081  | 2.483916  | -0.380958 |
| H | -1.087991 | -1.734022 | -0.490760 |
| O | 0.962042  | -1.252785 | -0.880184 |
| C | 1.861224  | -1.523619 | 0.177342  |
| C | 3.140548  | -0.703709 | 0.132146  |
| H | 2.119395  | -2.586927 | 0.107436  |
| H | 1.374899  | -1.379499 | 1.152353  |
| C | 3.597441  | -0.153034 | -1.067270 |
| C | 3.904107  | -0.520723 | 1.289402  |
| C | 4.791889  | 0.564962  | -1.109450 |
| H | 3.000222  | -0.285645 | -1.962293 |
| C | 5.100891  | 0.191668  | 1.249934  |
| H | 3.556325  | -0.934268 | 2.233049  |
| H | 5.131761  | 0.989990  | -2.049197 |
| C | 5.549432  | 0.738100  | 0.047756  |
| H | 5.679361  | 0.327479  | 2.158782  |
| H | 6.478803  | 1.298119  | 0.015245  |
| H | 0.450867  | -0.426172 | -0.654126 |

18 atoms

$\epsilon$ -CL in toluene

|   |           |           |           |
|---|-----------|-----------|-----------|
| O | 2.500347  | -0.086963 | -0.407845 |
| O | 0.776958  | 1.237257  | -0.076844 |
| C | 1.375078  | 0.023543  | 0.010100  |
| C | 0.596045  | -1.139396 | 0.599986  |
| H | 0.285025  | -0.904627 | 1.624546  |
| H | 1.308796  | -1.961211 | 0.662562  |
| C | -0.630731 | -1.563635 | -0.234891 |
| H | -0.352219 | -1.600850 | -1.294183 |
| H | -0.888094 | -2.589263 | 0.045654  |
| C | -1.865371 | -0.677682 | -0.040378 |
| H | -2.197791 | -0.758891 | 1.002729  |
| H | -2.685549 | -1.070431 | -0.650216 |
| C | -1.655398 | 0.802098  | -0.377746 |
| H | -1.432796 | 0.930544  | -1.443123 |
| H | -2.588802 | 1.345157  | -0.191667 |
| C | -0.555397 | 1.489287  | 0.424587  |
| H | -0.605456 | 1.230087  | 1.487139  |
| H | -0.646913 | 2.571839  | 0.344125  |

57 atoms

$\epsilon$ -CL, structure I1 in toluene

|   |           |           |           |
|---|-----------|-----------|-----------|
| O | 2.281395  | -0.994730 | -1.689467 |
| O | 2.702861  | -0.799738 | 0.452810  |
| C | 2.777569  | -0.327951 | -0.804973 |
| C | 3.512296  | 0.968195  | -1.074302 |
| H | 2.934848  | 1.782577  | -0.625198 |
| H | 3.471513  | 1.105919  | -2.154854 |
| C | 4.973841  | 1.010597  | -0.584820 |
| H | 5.481086  | 0.076835  | -0.854628 |
| H | 5.486118  | 1.802026  | -1.140433 |
| C | 5.133661  | 1.286087  | 0.914001  |
| H | 4.697652  | 2.267669  | 1.139821  |
| H | 6.200001  | 1.365493  | 1.151049  |
| C | 4.494447  | 0.236705  | 1.828604  |
| H | 5.000226  | -0.729799 | 1.719439  |
| H | 4.633317  | 0.539612  | 2.872867  |
| C | 3.001957  | 0.024888  | 1.606772  |
| H | 2.447323  | 0.960987  | 1.517721  |
| H | 2.571173  | -0.542849 | 2.430755  |
| O | 0.385866  | 1.269036  | 0.013580  |
| C | -0.278311 | 1.892972  | -1.062677 |
| C | -1.337780 | 2.904091  | -0.648686 |
| H | -0.735190 | 1.143798  | -1.723055 |
| H | 0.480999  | 2.411706  | -1.661986 |

|   |           |           |           |
|---|-----------|-----------|-----------|
| C | -1.400413 | 3.391230  | 0.657686  |
| C | -2.250655 | 3.391333  | -1.590719 |
| C | -2.353801 | 4.344554  | 1.017055  |
| H | -0.696470 | 3.008416  | 1.387453  |
| C | -3.201750 | 4.345204  | -1.236760 |
| H | -2.219652 | 3.017182  | -2.611448 |
| H | -2.389912 | 4.711561  | 2.038588  |
| C | -3.256733 | 4.826558  | 0.071782  |
| H | -3.904299 | 4.709812  | -1.980198 |
| H | -3.999245 | 5.567677  | 0.350791  |
| H | -0.122666 | 0.443284  | 0.260070  |
| N | -2.182728 | -3.027674 | 0.336600  |
| C | -1.186744 | -2.102169 | 0.101273  |
| N | -0.167884 | -2.490607 | -0.720419 |
| C | -0.164881 | -3.717715 | -1.490488 |
| C | -0.786368 | -4.824628 | -0.648770 |
| C | -2.176486 | -4.384465 | -0.209322 |
| C | -3.548050 | -1.139824 | 1.162997  |
| C | -2.195368 | -0.571052 | 1.585614  |
| N | -1.152022 | -0.908036 | 0.628864  |
| C | -3.421693 | -2.651002 | 1.020147  |
| H | 0.870376  | -3.946543 | -1.749763 |
| H | -0.719103 | -3.609655 | -2.435675 |
| H | -0.155247 | -5.010628 | 0.225441  |
| H | -0.860553 | -5.756976 | -1.215067 |
| H | -2.873497 | -4.442236 | -1.059188 |
| H | -2.564961 | -5.061143 | 0.560642  |
| H | -4.265880 | -3.054803 | 0.447804  |
| H | -3.450015 | -3.133042 | 2.007214  |
| H | -3.837178 | -0.694236 | 0.205736  |
| H | -4.332926 | -0.902806 | 1.887523  |
| H | -1.941756 | -0.945557 | 2.591096  |
| H | -2.247088 | 0.517977  | 1.666683  |
| H | 0.590043  | -1.836233 | -0.866388 |

57 atoms

$\epsilon$ -CL, structure TS12 in toluene

|   |          |           |           |
|---|----------|-----------|-----------|
| O | 1.685589 | -0.767415 | -1.651566 |
| O | 2.183261 | -0.933985 | 0.502307  |
| C | 2.175230 | -0.176173 | -0.666522 |
| C | 3.370491 | 0.758473  | -0.877285 |
| H | 3.291911 | 1.640682  | -0.239228 |
| H | 3.293989 | 1.099648  | -1.910463 |
| C | 4.730812 | 0.070607  | -0.649857 |
| H | 4.704114 | -0.947960 | -1.053833 |
| H | 5.490988 | 0.606827  | -1.228467 |

|   |           |           |           |
|---|-----------|-----------|-----------|
| C | 5.173363  | 0.055079  | 0.820828  |
| H | 5.223223  | 1.093327  | 1.175415  |
| H | 6.195599  | -0.335296 | 0.887605  |
| C | 4.273838  | -0.750855 | 1.766482  |
| H | 4.375782  | -1.822864 | 1.559580  |
| H | 4.612784  | -0.600926 | 2.799424  |
| C | 2.787364  | -0.405916 | 1.688492  |
| H | 2.603569  | 0.668925  | 1.754702  |
| H | 2.254091  | -0.883267 | 2.514729  |
| O | 0.881840  | 1.077995  | -0.075414 |
| C | 0.426691  | 1.882563  | -1.117704 |
| C | -0.663552 | 2.852090  | -0.686167 |
| H | 0.051125  | 1.281257  | -1.963898 |
| H | 1.253952  | 2.488718  | -1.533975 |
| C | -0.683854 | 3.372912  | 0.612073  |
| C | -1.647962 | 3.274720  | -1.585875 |
| C | -1.655348 | 4.295738  | 0.997869  |
| H | 0.071885  | 3.038638  | 1.314019  |
| C | -2.620679 | 4.198597  | -1.205734 |
| H | -1.653727 | 2.873346  | -2.596350 |
| H | -1.651711 | 4.692125  | 2.009343  |
| C | -2.628231 | 4.713849  | 0.089976  |
| H | -3.376643 | 4.512161  | -1.919858 |
| H | -3.385467 | 5.431999  | 0.389389  |
| H | -0.309201 | -0.009091 | 0.330028  |
| N | -2.469305 | -2.501337 | 0.331657  |
| C | -1.387300 | -1.753431 | -0.009211 |
| N | -0.575833 | -2.154205 | -0.992800 |
| C | -0.813124 | -3.361044 | -1.769534 |
| C | -1.468576 | -4.413169 | -0.884548 |
| C | -2.722969 | -3.822807 | -0.253810 |
| C | -3.384456 | -0.532804 | 1.524040  |
| C | -1.929667 | -0.140886 | 1.745550  |
| N | -1.124329 | -0.610960 | 0.628362  |
| C | -3.468277 | -2.037083 | 1.301669  |
| H | 0.151890  | -3.701825 | -2.147081 |
| H | -1.446670 | -3.145553 | -2.639983 |
| H | -0.765784 | -4.720868 | -0.104780 |
| H | -1.734487 | -5.300676 | -1.463539 |
| H | -3.525635 | -3.739553 | -0.997950 |
| H | -3.091616 | -4.473590 | 0.544994  |
| H | -4.455670 | -2.313501 | 0.919112  |
| H | -3.326639 | -2.575249 | 2.247742  |
| H | -3.773347 | -0.000133 | 0.651470  |
| H | -3.999262 | -0.256539 | 2.383904  |
| H | -1.561854 | -0.558911 | 2.692271  |
| H | -1.813450 | 0.942043  | 1.797665  |

|   |          |           |           |
|---|----------|-----------|-----------|
| H | 0.294251 | -1.613891 | -1.189535 |
|---|----------|-----------|-----------|

57 atoms

$\epsilon$ -CL, structure I2 in toluene

|   |           |           |           |
|---|-----------|-----------|-----------|
| O | 1.089296  | -1.402810 | -1.549465 |
| O | 1.474279  | -1.613334 | 0.648541  |
| C | 1.824608  | -0.903371 | -0.513095 |
| C | 3.317935  | -0.981094 | -0.877260 |
| H | 3.865099  | -0.201246 | -0.338118 |
| H | 3.390357  | -0.741154 | -1.939661 |
| C | 3.967215  | -2.348514 | -0.608356 |
| H | 3.274940  | -3.145397 | -0.898099 |
| H | 4.839892  | -2.447878 | -1.262653 |
| C | 4.436797  | -2.538341 | 0.843116  |
| H | 5.118170  | -1.714847 | 1.096324  |
| H | 5.036077  | -3.453466 | 0.909220  |
| C | 3.319252  | -2.606996 | 1.891445  |
| H | 2.769169  | -3.549373 | 1.789065  |
| H | 3.761786  | -2.611828 | 2.895553  |
| C | 2.300181  | -1.473684 | 1.810473  |
| H | 2.774806  | -0.487696 | 1.829360  |
| H | 1.617779  | -1.521653 | 2.662747  |
| O | 1.433879  | 0.467481  | -0.200773 |
| C | 1.538106  | 1.411436  | -1.275723 |
| C | 1.049523  | 2.752624  | -0.788983 |
| H | 0.947748  | 1.066526  | -2.128311 |
| H | 2.583024  | 1.490366  | -1.598937 |
| C | 1.767304  | 3.455077  | 0.186023  |
| C | -0.125831 | 3.314450  | -1.292446 |
| C | 1.323470  | 4.692870  | 0.642299  |
| H | 2.680309  | 3.026136  | 0.587906  |
| C | -0.571718 | 4.557367  | -0.842022 |
| H | -0.698267 | 2.774105  | -2.040060 |
| H | 1.892684  | 5.227590  | 1.396299  |
| C | 0.151656  | 5.248941  | 0.126734  |
| H | -1.484453 | 4.982814  | -1.247239 |
| H | -0.192811 | 6.216449  | 0.478094  |
| H | -0.551730 | 0.262157  | 0.320082  |
| N | -3.523250 | -1.014148 | 0.252973  |
| C | -2.210917 | -0.807255 | -0.112363 |
| N | -1.575527 | -1.493751 | -1.018888 |
| C | -2.304591 | -2.527495 | -1.735857 |
| C | -3.335513 | -3.217034 | -0.844865 |
| C | -4.269054 | -2.163831 | -0.261696 |
| C | -3.531941 | 1.098619  | 1.557080  |
| C | -2.036422 | 0.859216  | 1.712504  |

|   |           |           |           |
|---|-----------|-----------|-----------|
| N | -1.549921 | 0.229486  | 0.499336  |
| C | -4.221467 | -0.229547 | 1.271720  |
| H | -1.581009 | -3.254784 | -2.115750 |
| H | -2.808594 | -2.105277 | -2.619966 |
| H | -2.816097 | -3.740764 | -0.035619 |
| H | -3.916709 | -3.959246 | -1.400199 |
| H | -4.989066 | -1.825648 | -1.019956 |
| H | -4.853670 | -2.586041 | 0.563652  |
| H | -5.247051 | -0.057858 | 0.925293  |
| H | -4.296732 | -0.819153 | 2.197811  |
| H | -3.696922 | 1.796192  | 0.730762  |
| H | -3.956698 | 1.542507  | 2.461405  |
| H | -1.843999 | 0.244423  | 2.606089  |
| H | -1.498425 | 1.800186  | 1.842867  |
| H | 0.110089  | -1.428592 | -1.300686 |

57 atoms

$\epsilon$ -CL, structure TS23 in toluene

|   |           |           |           |
|---|-----------|-----------|-----------|
| O | 1.116888  | -1.093257 | -1.612211 |
| O | 1.353829  | -1.609052 | 0.560147  |
| C | 1.867247  | -0.826543 | -0.498538 |
| C | 3.345315  | -1.096026 | -0.825299 |
| H | 3.976551  | -0.502440 | -0.156681 |
| H | 3.510292  | -0.713039 | -1.834590 |
| C | 3.756455  | -2.575038 | -0.752239 |
| H | 2.957734  | -3.196299 | -1.169503 |
| H | 4.629423  | -2.723396 | -1.396726 |
| C | 4.124931  | -3.042784 | 0.664717  |
| H | 4.921883  | -2.391074 | 1.047427  |
| H | 4.559783  | -4.047208 | 0.610251  |
| C | 2.966906  | -3.064129 | 1.670367  |
| H | 2.272521  | -3.875188 | 1.422762  |
| H | 3.359066  | -3.284271 | 2.671256  |
| C | 2.153676  | -1.773978 | 1.738324  |
| H | 2.782147  | -0.893145 | 1.902074  |
| H | 1.444285  | -1.824898 | 2.568262  |
| O | 1.668701  | 0.526133  | -0.031658 |
| C | 1.993729  | 1.565150  | -0.962857 |
| C | 1.320656  | 2.843573  | -0.531098 |
| H | 1.648799  | 1.269536  | -1.958155 |
| H | 3.079933  | 1.709868  | -1.006500 |
| C | 2.066860  | 3.938965  | -0.092565 |
| C | -0.075101 | 2.948028  | -0.567624 |
| C | 1.437493  | 5.122444  | 0.295435  |
| H | 3.150307  | 3.867980  | -0.053510 |
| C | -0.706025 | 4.125809  | -0.178602 |

|   |           |           |           |
|---|-----------|-----------|-----------|
| H | -0.662131 | 2.097268  | -0.898205 |
| H | 2.032037  | 5.966106  | 0.631952  |
| C | 0.049000  | 5.217984  | 0.253077  |
| H | -1.788897 | 4.194781  | -0.214780 |
| H | -0.443993 | 6.137197  | 0.553838  |
| H | -0.482640 | -0.144943 | 0.812071  |
| N | -3.538968 | -0.896320 | 0.118387  |
| C | -2.201608 | -0.650261 | -0.094292 |
| N | -1.584352 | -0.812718 | -1.230359 |
| C | -2.369754 | -1.234423 | -2.380460 |
| C | -3.489273 | -2.194002 | -1.982229 |
| C | -4.355435 | -1.530643 | -0.918827 |
| C | -3.419022 | 0.177468  | 2.355836  |
| C | -1.955420 | -0.241972 | 2.334178  |
| N | -1.483113 | -0.148205 | 0.964902  |
| C | -4.208442 | -0.716568 | 1.407646  |
| H | -1.696318 | -1.709796 | -3.099509 |
| H | -2.801328 | -0.361501 | -2.895172 |
| H | -3.048174 | -3.112419 | -1.581094 |
| H | -4.107298 | -2.471695 | -2.841218 |
| H | -5.017324 | -0.780881 | -1.373763 |
| H | -5.001738 | -2.271720 | -0.435041 |
| H | -5.199785 | -0.288642 | 1.220080  |
| H | -4.372986 | -1.700973 | 1.870632  |
| H | -3.493196 | 1.222460  | 2.041402  |
| H | -3.837558 | 0.099039  | 3.362639  |
| H | -1.846454 | -1.258390 | 2.744547  |
| H | -1.347157 | 0.424913  | 2.948633  |
| H | 0.138779  | -0.985429 | -1.403800 |

57 atoms

$\epsilon$ -CL, structure I3 in toluene

|   |          |           |           |
|---|----------|-----------|-----------|
| O | 0.821251 | -0.892546 | -1.647857 |
| O | 0.928376 | -1.892016 | 0.363498  |
| C | 1.646476 | -1.105025 | -0.578032 |
| C | 2.937231 | -1.779390 | -1.077135 |
| H | 3.753393 | -1.544583 | -0.386859 |
| H | 3.182504 | -1.299344 | -2.026928 |
| C | 2.840471 | -3.301410 | -1.265396 |
| H | 1.867928 | -3.555912 | -1.698467 |
| H | 3.592815 | -3.607077 | -2.000258 |
| C | 3.087038 | -4.098690 | 0.026177  |
| H | 4.064564 | -3.804730 | 0.431193  |
| H | 3.172756 | -5.163232 | -0.219309 |
| C | 2.021123 | -3.933786 | 1.117441  |
| H | 1.098117 | -4.442576 | 0.816030  |



|   |           |           |           |
|---|-----------|-----------|-----------|
| H | 2.362140  | -4.427235 | 2.036156  |
| C | 1.660405  | -2.487717 | 1.445381  |
| H | 2.536111  | -1.879987 | 1.688100  |
| H | 0.994327  | -2.451551 | 2.311420  |
| O | 1.932651  | 0.103094  | 0.140455  |
| C | 2.530371  | 1.157814  | -0.609742 |
| C | 2.213437  | 2.483274  | 0.041985  |
| H | 2.133929  | 1.140376  | -1.630721 |
| H | 3.617858  | 1.021000  | -0.669967 |
| C | 3.189660  | 3.476103  | 0.148617  |
| C | 0.922923  | 2.749250  | 0.513382  |
| C | 2.885258  | 4.718785  | 0.704612  |
| H | 4.198813  | 3.277782  | -0.202642 |
| C | 0.619762  | 3.986713  | 1.075089  |
| H | 0.166869  | 1.975324  | 0.439900  |
| H | 3.656063  | 5.479455  | 0.781582  |
| C | 1.598402  | 4.977194  | 1.170555  |
| H | -0.384483 | 4.180161  | 1.440072  |
| H | 1.359845  | 5.940998  | 1.609481  |
| H | -0.943787 | -1.271279 | 0.737418  |
| N | -3.758809 | 0.080702  | -0.088301 |
| C | -2.414318 | -0.207054 | -0.132809 |
| N | -1.588610 | 0.226469  | -1.044068 |
| C | -2.102808 | 1.136434  | -2.055963 |
| C | -3.541268 | 0.798001  | -2.442355 |
| C | -4.406156 | 0.799761  | -1.187740 |
| C | -3.931173 | -0.918595 | 2.180701  |
| C | -2.751444 | -1.778493 | 1.746070  |
| N | -1.904199 | -0.975841 | 0.883830  |
| C | -4.668245 | -0.420280 | 0.943496  |
| H | -1.448006 | 1.081410  | -2.930394 |
| H | -2.053127 | 2.177846  | -1.701295 |
| H | -3.564117 | -0.193278 | -2.907020 |
| H | -3.942827 | 1.512047  | -3.167468 |
| H | -4.625180 | 1.829241  | -0.872654 |
| H | -5.370034 | 0.317755  | -1.386950 |
| H | -5.357317 | 0.388247  | 1.212969  |
| H | -5.282458 | -1.229737 | 0.521871  |
| H | -3.557569 | -0.072898 | 2.765185  |
| H | -4.621709 | -1.484290 | 2.811727  |
| H | -3.112292 | -2.690992 | 1.245479  |
| H | -2.159140 | -2.094435 | 2.607566  |
| H | -0.055732 | -0.493404 | -1.350226 |

57 atoms

$\epsilon$ -CL, structure TS3r in toluene

|   |           |           |           |
|---|-----------|-----------|-----------|
| O | -0.496618 | 1.355371  | -1.686374 |
| O | -0.632498 | 1.861699  | 0.499009  |
| C | -1.374286 | 1.418792  | -0.643476 |
| C | -2.532153 | 2.356114  | -1.015389 |
| H | -3.407264 | 2.083158  | -0.419935 |
| H | -2.776937 | 2.112512  | -2.052341 |
| C | -2.237249 | 3.855787  | -0.868108 |
| H | -1.214552 | 4.064799  | -1.198596 |
| H | -2.896470 | 4.408977  | -1.545708 |
| C | -2.467325 | 4.385360  | 0.556723  |
| H | -3.499956 | 4.151860  | 0.848364  |
| H | -2.397337 | 5.479062  | 0.551743  |
| C | -1.509472 | 3.840391  | 1.624196  |
| H | -0.508538 | 4.262422  | 1.477118  |
| H | -1.844294 | 4.172375  | 2.615048  |
| C | -1.364605 | 2.320539  | 1.644502  |
| H | -2.328304 | 1.807896  | 1.711065  |
| H | -0.777793 | 2.014693  | 2.515017  |
| O | -1.944152 | 0.148783  | -0.279514 |
| C | -1.686548 | -0.980166 | -1.120586 |
| C | -2.248040 | -2.199991 | -0.433299 |
| H | -0.611062 | -1.099677 | -1.276405 |
| H | -2.153710 | -0.842921 | -2.102150 |
| C | -3.348066 | -2.883901 | -0.953321 |
| C | -1.666893 | -2.663899 | 0.753070  |
| C | -3.856025 | -4.013777 | -0.310561 |
| H | -3.813867 | -2.530224 | -1.868786 |
| C | -2.172129 | -3.787540 | 1.399554  |
| H | -0.813005 | -2.134462 | 1.165198  |
| H | -4.711035 | -4.535417 | -0.729369 |
| C | -3.269422 | -4.467691 | 0.867770  |
| H | -1.709731 | -4.137404 | 2.317533  |
| H | -3.662788 | -5.345667 | 1.370559  |
| H | 0.950109  | 0.709170  | 0.915067  |
| N | 3.744153  | -0.632510 | 0.029563  |
| C | 2.471736  | -0.127121 | -0.093612 |
| N | 1.849110  | 0.058057  | -1.223289 |
| C | 2.514681  | -0.351265 | -2.451212 |
| C | 4.025037  | -0.141132 | -2.374097 |
| C | 4.566803  | -0.880225 | -1.156884 |
| C | 3.472877  | -0.813171 | 2.493117  |
| C | 2.489706  | 0.338273  | 2.332635  |
| N | 1.793961  | 0.163733  | 1.068952  |
| C | 4.431353  | -0.819933 | 1.308697  |
| H | 2.088933  | 0.222776  | -3.279148 |

|   |          |           |           |
|---|----------|-----------|-----------|
| H | 2.303213 | -1.409522 | -2.670369 |
| H | 4.235253 | 0.929495  | -2.281435 |
| H | 4.527538 | -0.499427 | -3.277297 |
| H | 4.614218 | -1.960381 | -1.351103 |
| H | 5.588286 | -0.552712 | -0.933840 |
| H | 4.976043 | -1.769846 | 1.267021  |
| H | 5.185919 | -0.029140 | 1.432163  |
| H | 2.915817 | -1.753587 | 2.534867  |
| H | 4.042749 | -0.719205 | 3.421156  |
| H | 3.022593 | 1.300786  | 2.385979  |
| H | 1.747149 | 0.333416  | 3.133416  |
| H | 0.364512 | 0.901742  | -1.424693 |

57 atoms

$\epsilon$ -CL, structure I3r in toluene

|   |           |           |           |
|---|-----------|-----------|-----------|
| O | 0.232925  | 1.026769  | 1.762902  |
| O | 0.281712  | 1.725859  | -0.373608 |
| C | 1.088050  | 1.471520  | 0.791002  |
| C | 1.836291  | 2.709500  | 1.304145  |
| H | 2.802901  | 2.774313  | 0.797481  |
| H | 2.049025  | 2.501351  | 2.354744  |
| C | 1.074654  | 4.034158  | 1.160567  |
| H | 0.018875  | 3.882182  | 1.408145  |
| H | 1.463902  | 4.736396  | 1.905375  |
| C | 1.220499  | 4.683823  | -0.225625 |
| H | 2.290970  | 4.797330  | -0.442161 |
| H | 0.812325  | 5.700332  | -0.192066 |
| C | 0.552106  | 3.928935  | -1.382125 |
| H | -0.537890 | 4.016503  | -1.302385 |
| H | 0.832047  | 4.399196  | -2.333141 |
| C | 0.890734  | 2.442532  | -1.456400 |
| H | 1.968966  | 2.258808  | -1.465074 |
| H | 0.482360  | 2.007555  | -2.373203 |
| O | 2.104586  | 0.536592  | 0.449852  |
| C | 1.665012  | -0.787118 | 0.152744  |
| C | 2.860647  | -1.656950 | -0.150416 |
| H | 0.975947  | -0.778831 | -0.698371 |
| H | 1.114623  | -1.188228 | 1.010881  |
| C | 4.079793  | -1.469249 | 0.508298  |
| C | 2.749037  | -2.702223 | -1.071737 |
| C | 5.160153  | -2.310545 | 0.252038  |
| H | 4.178091  | -0.652762 | 1.214152  |
| C | 3.826271  | -3.550262 | -1.323815 |
| H | 1.811136  | -2.853820 | -1.599309 |
| H | 6.101370  | -2.149394 | 0.768785  |
| C | 5.037310  | -3.356303 | -0.662369 |

|   |           |           |           |
|---|-----------|-----------|-----------|
| H | 3.721547  | -4.356396 | -2.043475 |
| H | 5.879816  | -4.011289 | -0.860882 |
| H | -1.382540 | 0.726508  | -0.803956 |
| N | -3.781806 | -1.290217 | -0.041282 |
| C | -2.591453 | -0.611749 | 0.078526  |
| N | -1.810077 | -0.652052 | 1.119613  |
| C | -2.183430 | -1.522628 | 2.224222  |
| C | -3.698078 | -1.583347 | 2.409885  |
| C | -4.342508 | -2.018533 | 1.099392  |
| C | -3.926221 | -0.683643 | -2.446787 |
| C | -3.098743 | 0.533119  | -2.053735 |
| N | -2.179902 | 0.130569  | -1.004110 |
| C | -4.652159 | -1.212507 | -1.215748 |
| H | -1.700144 | -1.150242 | 3.131899  |
| H | -1.792958 | -2.539849 | 2.063530  |
| H | -4.065122 | -0.590945 | 2.691751  |
| H | -3.978537 | -2.277898 | 3.207150  |
| H | -4.210670 | -3.098158 | 0.945046  |
| H | -5.421822 | -1.831060 | 1.123436  |
| H | -5.050530 | -2.214302 | -1.411953 |
| H | -5.514913 | -0.570117 | -0.985019 |
| H | -3.259947 | -1.450779 | -2.851979 |
| H | -4.657217 | -0.431409 | -3.219398 |
| H | -3.761114 | 1.354405  | -1.737460 |
| H | -2.512132 | 0.897605  | -2.899892 |
| H | -0.497446 | 0.429947  | 1.412254  |

57 atoms

$\epsilon$ -CL, structure TS3r2 in toluene

|   |           |          |           |
|---|-----------|----------|-----------|
| O | 0.389340  | 0.610239 | 1.411933  |
| O | 0.117199  | 1.195048 | -0.743308 |
| C | 0.981955  | 1.319201 | 0.395208  |
| C | 1.243921  | 2.773586 | 0.817018  |
| H | 2.062786  | 3.184519 | 0.219753  |
| H | 1.611195  | 2.706935 | 1.842980  |
| C | 0.016096  | 3.690997 | 0.741565  |
| H | -0.874689 | 3.142885 | 1.067757  |
| H | 0.147943  | 4.509421 | 1.456943  |
| C | -0.205733 | 4.305031 | -0.650100 |
| H | 0.709099  | 4.837389 | -0.941882 |
| H | -0.990212 | 5.067801 | -0.588973 |
| C | -0.579261 | 3.307682 | -1.754048 |
| H | -1.602340 | 2.945758 | -1.598929 |
| H | -0.574893 | 3.820435 | -2.724047 |
| C | 0.328831  | 2.083825 | -1.848814 |
| H | 1.387260  | 2.352182 | -1.916407 |

|   |           |           |           |
|---|-----------|-----------|-----------|
| H | 0.085572  | 1.504930  | -2.744008 |
| O | 2.260643  | 0.793918  | 0.082430  |
| C | 2.305005  | -0.605587 | -0.194585 |
| C | 3.720972  | -1.108068 | -0.048685 |
| H | 1.937722  | -0.801366 | -1.208476 |
| H | 1.643093  | -1.125474 | 0.505181  |
| C | 4.563953  | -0.610936 | 0.950272  |
| C | 4.198966  | -2.116910 | -0.889610 |
| C | 5.852345  | -1.116432 | 1.106319  |
| H | 4.205070  | 0.181600  | 1.596572  |
| C | 5.485586  | -2.629827 | -0.730762 |
| H | 3.560244  | -2.505070 | -1.678668 |
| H | 6.495614  | -0.717992 | 1.885012  |
| C | 6.317772  | -2.129913 | 0.268645  |
| H | 5.839992  | -3.413107 | -1.393799 |
| H | 7.322188  | -2.522859 | 0.391156  |
| H | -1.270601 | -0.215049 | -1.028724 |
| N | -3.965515 | -1.483502 | 0.191766  |
| C | -2.731054 | -0.877164 | 0.167022  |
| N | -2.121863 | -0.379094 | 1.203737  |
| C | -2.754715 | -0.517509 | 2.506467  |
| C | -4.276853 | -0.443307 | 2.408595  |
| C | -4.764210 | -1.494988 | 1.419262  |
| C | -3.672828 | -2.253228 | -2.150764 |
| C | -2.766666 | -1.038733 | -2.302037 |
| N | -2.074583 | -0.833889 | -1.042186 |
| C | -4.636480 | -2.017403 | -0.994179 |
| H | -2.372631 | 0.273564  | 3.157883  |
| H | -2.463435 | -1.469396 | 2.977329  |
| H | -4.566974 | 0.553816  | 2.060822  |
| H | -4.750376 | -0.604079 | 3.381538  |
| H | -4.728660 | -2.495458 | 1.871647  |
| H | -5.808437 | -1.307406 | 1.145422  |
| H | -5.127482 | -2.955991 | -0.713973 |
| H | -5.433490 | -1.325264 | -1.304619 |
| H | -3.055968 | -3.134942 | -1.954441 |
| H | -4.240962 | -2.437440 | -3.066282 |
| H | -3.361035 | -0.160707 | -2.601870 |
| H | -2.018101 | -1.204565 | -3.080171 |
| H | -0.536820 | 0.274787  | 1.202900  |

57 atoms

$\epsilon$ -CL, structure I3r2 in toluene

|   |          |           |           |
|---|----------|-----------|-----------|
| O | 0.520340 | -0.085759 | 1.056808  |
| O | 0.235932 | 0.910375  | -0.935736 |
| C | 0.987949 | 0.958731  | 0.293353  |

|   |           |           |           |
|---|-----------|-----------|-----------|
| C | 0.897692  | 2.320121  | 1.009291  |
| H | 1.662918  | 2.986634  | 0.600715  |
| H | 1.187515  | 2.117585  | 2.042401  |
| C | -0.476844 | 3.002842  | 0.956772  |
| H | -1.271066 | 2.257629  | 1.073693  |
| H | -0.559542 | 3.675565  | 1.817102  |
| C | -0.701158 | 3.832472  | -0.317917 |
| H | 0.116014  | 4.560756  | -0.404906 |
| H | -1.618428 | 4.422320  | -0.208716 |
| C | -0.792074 | 3.023929  | -1.618151 |
| H | -1.734870 | 2.465194  | -1.643865 |
| H | -0.815996 | 3.711614  | -2.472814 |
| C | 0.341904  | 2.024007  | -1.832650 |
| H | 1.327641  | 2.489568  | -1.736016 |
| H | 0.282532  | 1.599653  | -2.838644 |
| O | 2.357275  | 0.769800  | 0.031297  |
| C | 2.712111  | -0.478608 | -0.578620 |
| C | 4.128420  | -0.834558 | -0.200098 |
| H | 2.617548  | -0.396706 | -1.666602 |
| H | 2.018533  | -1.249463 | -0.235046 |
| C | 4.539506  | -0.782688 | 1.136711  |
| C | 5.043434  | -1.253604 | -1.168175 |
| C | 5.833911  | -1.147586 | 1.494417  |
| H | 3.836264  | -0.449093 | 1.891952  |
| C | 6.340130  | -1.625816 | -0.812255 |
| H | 4.742126  | -1.287492 | -2.211714 |
| H | 6.138663  | -1.101655 | 2.535493  |
| C | 6.739274  | -1.572777 | 0.520756  |
| H | 7.038801  | -1.948486 | -1.578036 |
| H | 7.748889  | -1.856834 | 0.800589  |
| H | -1.342180 | -0.327899 | -1.092067 |
| N | -4.139554 | -1.312203 | 0.184742  |
| C | -2.853873 | -0.826520 | 0.138204  |
| N | -2.179380 | -0.399945 | 1.169995  |
| C | -2.797237 | -0.501721 | 2.482767  |
| C | -4.306135 | -0.275207 | 2.418809  |
| C | -4.914828 | -1.257679 | 1.425829  |
| C | -3.946666 | -2.135637 | -2.147840 |
| C | -2.938070 | -1.009704 | -2.333244 |
| N | -2.226078 | -0.826367 | -1.082543 |
| C | -4.872356 | -1.790728 | -0.988022 |
| H | -2.326906 | 0.234166  | 3.141416  |
| H | -2.593970 | -1.487221 | 2.930446  |
| H | -4.503085 | 0.751249  | 2.091798  |
| H | -4.773929 | -0.404432 | 3.399196  |
| H | -4.974537 | -2.262655 | 1.865606  |
| H | -5.938820 | -0.960688 | 1.172723  |

|   |           |           |           |
|---|-----------|-----------|-----------|
| H | -5.450015 | -2.672748 | -0.690196 |
| H | -5.600561 | -1.027770 | -1.301270 |
| H | -3.409590 | -3.065135 | -1.937776 |
| H | -4.538420 | -2.286592 | -3.054421 |
| H | -3.455045 | -0.092426 | -2.657452 |
| H | -2.209158 | -1.260880 | -3.106969 |
| H | -0.485144 | -0.135087 | 1.069450  |

57 atoms

$\epsilon$ -CL, structure TS34 in toluene

|   |           |           |           |
|---|-----------|-----------|-----------|
| O | -0.270760 | 0.654891  | -1.550467 |
| O | -0.105332 | 0.922487  | 0.952120  |
| C | -1.007752 | 1.283699  | -0.775503 |
| C | -1.058497 | 2.803228  | -0.751172 |
| H | -1.809922 | 3.128190  | -0.028533 |
| H | -1.449533 | 3.076219  | -1.739481 |
| C | 0.281654  | 3.516720  | -0.508211 |
| H | 1.101697  | 2.858926  | -0.811101 |
| H | 0.334042  | 4.390469  | -1.167770 |
| C | 0.489852  | 4.014589  | 0.933057  |
| H | -0.398273 | 4.590427  | 1.227843  |
| H | 1.319182  | 4.733492  | 0.935257  |
| C | 0.771176  | 2.949220  | 2.001432  |
| H | 1.771604  | 2.526051  | 1.839765  |
| H | 0.798977  | 3.442592  | 2.983804  |
| C | -0.223834 | 1.777133  | 2.043917  |
| H | -1.253281 | 2.172185  | 2.126996  |
| H | -0.053158 | 1.221863  | 2.986727  |
| O | -2.254198 | 0.794624  | -0.447071 |
| C | -2.389473 | -0.622756 | -0.502926 |
| C | -3.832517 | -1.009137 | -0.292907 |
| H | -1.749353 | -1.062202 | 0.267696  |
| H | -2.031171 | -0.981106 | -1.473620 |
| C | -4.881407 | -0.151361 | -0.635800 |
| C | -4.140905 | -2.274494 | 0.217134  |
| C | -6.206693 | -0.552493 | -0.476312 |
| H | -4.652054 | 0.836597  | -1.017204 |
| C | -5.464760 | -2.680360 | 0.370817  |
| H | -3.336280 | -2.947892 | 0.500994  |
| H | -7.009466 | 0.128223  | -0.743202 |
| C | -6.504549 | -1.818786 | 0.024378  |
| H | -5.684110 | -3.665938 | 0.770123  |
| H | -7.537109 | -2.129604 | 0.148993  |
| H | 1.119187  | -0.010712 | 0.946394  |
| N | 3.933196  | -1.416780 | -0.088673 |
| C | 2.755863  | -0.741915 | -0.107569 |

|   |          |           |           |
|---|----------|-----------|-----------|
| N | 2.344077 | -0.134257 | -1.232622 |
| C | 3.038177 | -0.278815 | -2.503549 |
| C | 4.536197 | -0.363760 | -2.247175 |
| C | 4.815583 | -1.489802 | -1.259633 |
| C | 3.218775 | -2.479948 | 2.024736  |
| C | 2.372498 | -1.234719 | 2.253810  |
| N | 1.987596 | -0.655378 | 0.975422  |
| C | 4.385973 | -2.134797 | 1.108493  |
| H | 2.788118 | 0.586603  | -3.118905 |
| H | 2.690368 | -1.171821 | -3.039897 |
| H | 4.890804 | 0.587421  | -1.839361 |
| H | 5.078450 | -0.550372 | -3.176864 |
| H | 4.695101 | -2.467329 | -1.744067 |
| H | 5.846936 | -1.433333 | -0.899834 |
| H | 4.890538 | -3.045837 | 0.775027  |
| H | 5.130559 | -1.527823 | 1.639287  |
| H | 2.605004 | -3.260395 | 1.564928  |
| H | 3.598502 | -2.870658 | 2.971635  |
| H | 2.926976 | -0.505011 | 2.858961  |
| H | 1.457012 | -1.474348 | 2.797692  |
| H | 1.376721 | 0.225337  | -1.259930 |

57 atoms

$\epsilon$ -CL, structure I4 in toluene

|   |           |           |           |
|---|-----------|-----------|-----------|
| O | -0.006819 | 1.707860  | -1.617617 |
| O | -0.448074 | 1.267091  | 1.456963  |
| C | -1.063479 | 2.035941  | -1.116780 |
| C | -1.400287 | 3.416647  | -0.601845 |
| H | -2.020475 | 3.301133  | 0.288508  |
| H | -2.051771 | 3.863146  | -1.363743 |
| C | -0.191134 | 4.328166  | -0.350690 |
| H | 0.611274  | 4.051209  | -1.041120 |
| H | -0.480598 | 5.349371  | -0.620407 |
| C | 0.357698  | 4.384214  | 1.086811  |
| H | -0.463252 | 4.623971  | 1.776416  |
| H | 1.027225  | 5.251613  | 1.123052  |
| C | 1.140607  | 3.173622  | 1.636432  |
| H | 1.755116  | 2.723721  | 0.848181  |
| H | 1.846130  | 3.552003  | 2.388356  |
| C | 0.326132  | 2.073567  | 2.328422  |
| H | -0.364149 | 2.532415  | 3.046883  |
| H | 1.015959  | 1.442327  | 2.906402  |
| O | -2.128539 | 1.225811  | -1.039236 |
| C | -1.936219 | -0.166134 | -1.398361 |
| C | -3.032097 | -0.970743 | -0.753580 |
| H | -0.953552 | -0.478630 | -1.041345 |



|   |           |           |           |
|---|-----------|-----------|-----------|
| H | -1.954978 | -0.256207 | -2.487095 |
| C | -3.887693 | -1.764571 | -1.518430 |
| C | -3.186633 | -0.945817 | 0.638744  |
| C | -4.879917 | -2.532671 | -0.907613 |
| H | -3.781154 | -1.783943 | -2.599459 |
| C | -4.180822 | -1.705828 | 1.247322  |
| H | -2.526562 | -0.321566 | 1.233428  |
| H | -5.538549 | -3.146145 | -1.514318 |
| C | -5.028833 | -2.503535 | 0.476306  |
| H | -4.294990 | -1.678178 | 2.326520  |
| H | -5.802465 | -3.096644 | 0.953788  |
| H | 0.123876  | 0.523396  | 1.134409  |
| N | 3.178377  | -1.916558 | 0.072249  |
| C | 2.206085  | -0.944423 | 0.023878  |
| N | 2.398295  | 0.091425  | -0.863847 |
| C | 3.340750  | -0.007481 | -1.965593 |
| C | 4.642206  | -0.582669 | -1.425598 |
| C | 4.360693  | -1.938614 | -0.791058 |
| C | 1.549952  | -3.291769 | 1.313641  |
| C | 0.978461  | -1.955020 | 1.778933  |
| N | 1.142832  | -0.911526 | 0.777101  |
| C | 3.009082  | -3.097026 | 0.922147  |
| H | 3.490863  | 0.994140  | -2.373442 |
| H | 2.959663  | -0.639043 | -2.783672 |
| H | 5.054890  | 0.104975  | -0.681594 |
| H | 5.382013  | -0.699354 | -2.221798 |
| H | 4.224458  | -2.699044 | -1.574332 |
| H | 5.216440  | -2.260010 | -0.186758 |
| H | 3.376255  | -3.967532 | 0.367431  |
| H | 3.639480  | -3.000909 | 1.816881  |
| H | 0.979276  | -3.647304 | 0.449258  |
| H | 1.474526  | -4.054123 | 2.094593  |
| H | 1.462606  | -1.661866 | 2.724202  |
| H | -0.088067 | -2.051248 | 2.000728  |
| H | 1.564137  | 0.643717  | -1.027878 |

57 atoms

$\epsilon$ -CL, structure I5 in toluene

|   |           |           |           |
|---|-----------|-----------|-----------|
| O | 4.160685  | 1.887777  | -1.343338 |
| O | -3.204146 | -0.155334 | -1.836272 |
| C | 4.146883  | 0.843257  | -0.736746 |
| C | 2.925769  | -0.011020 | -0.468817 |
| H | 2.814545  | -0.094689 | 0.618718  |
| H | 3.146724  | -1.027367 | -0.813167 |
| C | 1.648338  | 0.526284  | -1.111774 |
| H | 1.468019  | 1.547550  | -0.760895 |

|   |           |           |           |
|---|-----------|-----------|-----------|
| H | 1.792592  | 0.604668  | -2.194423 |
| C | 0.427272  | -0.349313 | -0.814186 |
| H | 0.287842  | -0.421321 | 0.272753  |
| H | 0.620470  | -1.372942 | -1.160958 |
| C | -0.858256 | 0.172725  | -1.461568 |
| H | -1.058137 | 1.197308  | -1.125514 |
| H | -0.737018 | 0.223774  | -2.549681 |
| C | -2.076568 | -0.687288 | -1.157734 |
| H | -2.253476 | -0.719062 | -0.071367 |
| H | -1.885344 | -1.722139 | -1.481435 |
| O | 5.250910  | 0.283576  | -0.197220 |
| C | 6.494871  | 1.016302  | -0.384158 |
| C | 7.596594  | 0.231127  | 0.268362  |
| H | 6.382687  | 2.007470  | 0.058594  |
| H | 6.661732  | 1.143482  | -1.455209 |
| C | 8.260597  | -0.778955 | -0.434496 |
| C | 7.960061  | 0.482839  | 1.594304  |
| C | 9.268220  | -1.522597 | 0.174660  |
| H | 7.986352  | -0.982883 | -1.465437 |
| C | 8.968218  | -0.258143 | 2.207098  |
| H | 7.450770  | 1.264998  | 2.149725  |
| H | 9.777876  | -2.301690 | -0.382972 |
| C | 9.624163  | -1.262751 | 1.497598  |
| H | 9.243195  | -0.050041 | 3.236065  |
| H | 10.411699 | -1.839063 | 1.972343  |
| H | -4.009806 | -0.665161 | -1.558465 |
| N | -7.049663 | -0.081635 | 0.842465  |
| C | -5.962383 | -0.061043 | -0.001053 |
| N | -5.338096 | 1.151552  | -0.183865 |
| C | -5.533589 | 2.277017  | 0.709645  |
| C | -7.024776 | 2.397575  | 0.996510  |
| C | -7.529454 | 1.085205  | 1.584178  |
| C | -6.830249 | -2.541432 | 0.830480  |
| C | -6.233791 | -2.340650 | -0.561900 |
| N | -5.506184 | -1.086445 | -0.662986 |
| C | -7.710879 | -1.345606 | 1.172971  |
| H | -5.155732 | 3.174573  | 0.215508  |
| H | -4.975824 | 2.164239  | 1.653060  |
| H | -7.549534 | 2.619632  | 0.062820  |
| H | -7.226822 | 3.211494  | 1.697747  |
| H | -7.218354 | 1.001432  | 2.636373  |
| H | -8.625041 | 1.065258  | 1.578625  |
| H | -7.944027 | -1.337348 | 2.243778  |
| H | -8.669380 | -1.408396 | 0.639662  |
| H | -6.017617 | -2.623156 | 1.560155  |
| H | -7.419220 | -3.461616 | 0.888279  |
| H | -7.038178 | -2.383017 | -1.313401 |

|   |           |           |           |
|---|-----------|-----------|-----------|
| H | -5.548389 | -3.158014 | -0.804356 |
| H | -4.480835 | 1.088376  | -0.721805 |

**Table S6:** Cartesian coordinates (in Angstroms) of all intermediates and transition states of the second step of the TBD-catalyzed ROP of  $\epsilon$ -CL/3-isomer/7-isomer (i.e. addition of another  $\epsilon$ -CL/3-isomer/7-isomer unit to the  $\epsilon$ -CL/3-isomer/7-isomer chain end) optimized in toluene using the PCM-B3LYP/6-311G(d) method

75 atoms

addition of another  $\epsilon$ -CL unit to the  $\epsilon$ -CL chain end, structure I1, in toluene

|   |           |           |           |
|---|-----------|-----------|-----------|
| O | -3.529169 | 1.334479  | 2.030701  |
| O | -4.588971 | 2.091564  | 0.267171  |
| C | -3.552853 | 2.140729  | 1.123200  |
| C | -2.501189 | 3.217760  | 0.960430  |
| H | -1.935125 | 2.997999  | 0.049764  |
| H | -1.817853 | 3.086500  | 1.799617  |
| C | -3.036073 | 4.663456  | 0.927472  |
| H | -3.779673 | 4.801038  | 1.721323  |
| H | -2.204132 | 5.329246  | 1.176684  |
| C | -3.617375 | 5.095505  | -0.422996 |
| H | -2.828002 | 5.030856  | -1.182691 |
| H | -3.900874 | 6.152027  | -0.368364 |
| C | -4.824581 | 4.276894  | -0.890510 |
| H | -5.677572 | 4.429439  | -0.218912 |
| H | -5.141532 | 4.636852  | -1.876159 |
| C | -4.568705 | 2.779826  | -1.008922 |
| H | -3.629632 | 2.546795  | -1.514656 |
| H | -5.374723 | 2.296664  | -1.559826 |
| N | -5.602347 | -3.072734 | -0.049667 |
| C | -4.864417 | -1.910499 | 0.054029  |
| N | -4.900151 | -1.263157 | 1.255974  |
| C | -5.504120 | -1.805744 | 2.455439  |
| C | -6.776597 | -2.549589 | 2.070014  |
| C | -6.431867 | -3.606933 | 1.029382  |
| C | -4.275377 | -3.565401 | -2.077705 |
| C | -4.245008 | -2.044400 | -2.215951 |
| N | -4.166489 | -1.391882 | -0.918816 |
| C | -5.466137 | -3.954764 | -1.210244 |
| H | -5.718479 | -0.973769 | 3.128950  |
| H | -4.820244 | -2.484909 | 2.987868  |
| H | -7.499477 | -1.838197 | 1.659502  |

|   |           |           |           |
|---|-----------|-----------|-----------|
| H | -7.232865 | -3.028958 | 2.940402  |
| H | -5.913108 | -4.450329 | 1.510285  |
| H | -7.346526 | -4.015259 | 0.583844  |
| H | -5.356790 | -4.984786 | -0.848811 |
| H | -6.394053 | -3.923663 | -1.798105 |
| H | -3.344510 | -3.898901 | -1.607256 |
| H | -4.350734 | -4.062377 | -3.049704 |
| H | -5.138652 | -1.713218 | -2.770460 |
| H | -3.383182 | -1.726676 | -2.809996 |
| H | -4.408694 | -0.380229 | 1.320954  |
| O | 5.409442  | 1.730343  | -1.328634 |
| O | -2.148958 | 0.491044  | -1.002687 |
| C | 5.347038  | 0.716948  | -0.673913 |
| C | 4.076405  | 0.008918  | -0.253671 |
| H | 4.055300  | -0.004283 | 0.842551  |
| H | 4.163543  | -1.041835 | -0.551078 |
| C | 2.806003  | 0.642517  | -0.818104 |
| H | 2.768382  | 1.697091  | -0.526702 |
| H | 2.853430  | 0.637528  | -1.912288 |
| C | 1.533842  | -0.071388 | -0.351053 |
| H | 1.492437  | -0.059489 | 0.746069  |
| H | 1.583329  | -1.130021 | -0.638310 |
| C | 0.253586  | 0.550231  | -0.915983 |
| H | 0.205132  | 1.610621  | -0.639535 |
| H | 0.270250  | 0.518276  | -2.011802 |
| C | -1.014893 | -0.140725 | -0.432516 |
| H | -1.061157 | -0.105088 | 0.667622  |
| H | -0.984740 | -1.203821 | -0.714855 |
| O | 6.434836  | 0.064626  | -0.210876 |
| C | 7.722943  | 0.658852  | -0.537242 |
| C | 8.795729  | -0.201821 | 0.066362  |
| H | 7.743560  | 1.675759  | -0.141245 |
| H | 7.810494  | 0.719325  | -1.623285 |
| C | 9.377134  | -1.236431 | -0.672062 |
| C | 9.213705  | 0.005582  | 1.384435  |
| C | 10.358465 | -2.047645 | -0.106572 |
| H | 9.059896  | -1.406792 | -1.696749 |
| C | 10.193832 | -0.803583 | 1.953727  |
| H | 8.768509  | 0.806678  | 1.967284  |
| H | 10.804347 | -2.845191 | -0.692058 |
| C | 10.768534 | -1.832184 | 1.208132  |
| H | 10.511588 | -0.629990 | 2.976757  |
| H | 11.534990 | -2.461260 | 1.649214  |
| H | -2.925524 | -0.122355 | -0.904754 |

75 atoms

addition of another  $\epsilon$ -CL unit to the  $\epsilon$ -CL chain end, structure  
TS12, in toluene

|   |           |           |           |
|---|-----------|-----------|-----------|
| O | -3.264365 | 1.089312  | 1.816346  |
| O | -4.428868 | 1.826091  | 0.079621  |
| C | -3.223271 | 1.769715  | 0.772770  |
| C | -2.359376 | 3.033152  | 0.734071  |
| H | -1.888857 | 3.151874  | -0.242190 |
| H | -1.560692 | 2.861794  | 1.457571  |
| C | -3.140041 | 4.313410  | 1.092311  |
| H | -3.849018 | 4.104929  | 1.901823  |
| H | -2.434983 | 5.052214  | 1.488906  |
| C | -3.861879 | 4.939560  | -0.110400 |
| H | -3.110870 | 5.173695  | -0.876693 |
| H | -4.298217 | 5.900263  | 0.187126  |
| C | -4.960102 | 4.072639  | -0.739944 |
| H | -5.819069 | 4.004031  | -0.061896 |
| H | -5.323849 | 4.561881  | -1.652443 |
| C | -4.537739 | 2.646064  | -1.089872 |
| H | -3.606373 | 2.610600  | -1.659812 |
| H | -5.313539 | 2.171749  | -1.696514 |
| N | -5.456764 | -2.936373 | -0.059768 |
| C | -4.691450 | -1.828472 | 0.128674  |
| N | -4.597903 | -1.276847 | 1.344106  |
| C | -5.255362 | -1.832735 | 2.516586  |
| C | -6.572576 | -2.476095 | 2.103092  |
| C | -6.306794 | -3.491585 | 0.999493  |
| C | -4.290781 | -3.300957 | -2.216958 |
| C | -4.141385 | -1.785002 | -2.245378 |
| N | -4.021876 | -1.282845 | -0.886311 |
| C | -5.475632 | -3.667712 | -1.332178 |
| H | -5.414317 | -1.014385 | 3.219958  |
| H | -4.609662 | -2.569083 | 3.012897  |
| H | -7.257607 | -1.702511 | 1.744044  |
| H | -7.047327 | -2.975179 | 2.951151  |
| H | -5.829423 | -4.390596 | 1.410460  |
| H | -7.246810 | -3.809663 | 0.538112  |
| H | -5.464003 | -4.737699 | -1.101566 |
| H | -6.420856 | -3.460284 | -1.849961 |
| H | -3.373799 | -3.748093 | -1.821851 |
| H | -4.449713 | -3.700061 | -3.221591 |
| H | -4.999722 | -1.328356 | -2.756680 |
| H | -3.244995 | -1.480620 | -2.787539 |
| H | -4.097968 | -0.372007 | 1.459060  |

|   |           |           |           |
|---|-----------|-----------|-----------|
| O | 5.285855  | 1.246708  | -1.879740 |
| O | -2.306093 | 0.703002  | -0.531502 |
| C | 5.232770  | 0.479116  | -0.948327 |
| C | 3.968845  | -0.053807 | -0.308003 |
| H | 4.062467  | 0.068207  | 0.776358  |
| H | 3.951223  | -1.137940 | -0.474222 |
| C | 2.691116  | 0.599429  | -0.833151 |
| H | 2.738900  | 1.679505  | -0.656541 |
| H | 2.643277  | 0.478152  | -1.920067 |
| C | 1.424734  | 0.026493  | -0.188854 |
| H | 1.489554  | 0.136096  | 0.902004  |
| H | 1.379014  | -1.054859 | -0.378127 |
| C | 0.136470  | 0.687377  | -0.687834 |
| H | 0.176881  | 1.765422  | -0.492146 |
| H | 0.055808  | 0.577870  | -1.776920 |
| C | -1.134832 | 0.114278  | -0.046639 |
| H | -1.079303 | 0.220820  | 1.050664  |
| H | -1.150880 | -0.977814 | -0.234182 |
| O | 6.329432  | -0.026697 | -0.342345 |
| C | 7.610714  | 0.404040  | -0.881216 |
| C | 8.696248  | -0.232334 | -0.060979 |
| H | 7.653072  | 1.493726  | -0.839830 |
| H | 7.663611  | 0.105499  | -1.929766 |
| C | 9.242200  | -1.463271 | -0.435696 |
| C | 9.162448  | 0.387762  | 1.102295  |
| C | 10.235912 | -2.063317 | 0.334587  |
| H | 8.887244  | -1.953830 | -1.337376 |
| C | 10.155146 | -0.209010 | 1.875563  |
| H | 8.745134  | 1.344390  | 1.402876  |
| H | 10.653934 | -3.017505 | 0.030399  |
| C | 10.694175 | -1.436509 | 1.492251  |
| H | 10.510370 | 0.284432  | 2.774478  |
| H | 11.470324 | -1.901020 | 2.091919  |
| H | -3.378220 | -0.443888 | -0.714689 |

75 atoms

addition of another  $\epsilon$ -CL unit to the  $\epsilon$ -CL chain end, structure I2, in toluene

|   |           |          |           |
|---|-----------|----------|-----------|
| O | -3.505620 | 1.238961 | 1.663335  |
| O | -4.344331 | 1.920341 | -0.303820 |
| C | -3.174404 | 1.827261 | 0.474879  |
| C | -2.499264 | 3.179248 | 0.760477  |
| H | -1.871796 | 3.454437 | -0.091579 |

|   |           |           |           |
|---|-----------|-----------|-----------|
| H | -1.827788 | 3.017254  | 1.606558  |
| C | -3.476220 | 4.323689  | 1.075936  |
| H | -4.294019 | 3.946193  | 1.697681  |
| H | -2.951308 | 5.071555  | 1.679858  |
| C | -4.024767 | 5.023418  | -0.178092 |
| H | -3.173977 | 5.386744  | -0.770119 |
| H | -4.582830 | 5.917105  | 0.123492  |
| C | -4.925973 | 4.160723  | -1.070982 |
| H | -5.886119 | 3.984403  | -0.572815 |
| H | -5.150427 | 4.707249  | -1.995690 |
| C | -4.348758 | 2.795321  | -1.437551 |
| H | -3.346903 | 2.871271  | -1.872119 |
| H | -4.987481 | 2.308548  | -2.178874 |
| N | -5.549130 | -2.996274 | 0.029211  |
| C | -4.753534 | -1.886742 | 0.214985  |
| N | -4.673975 | -1.206351 | 1.322023  |
| C | -5.434025 | -1.673395 | 2.470780  |
| C | -6.769130 | -2.287804 | 2.056036  |
| C | -6.509371 | -3.406783 | 1.055411  |
| C | -4.459011 | -3.462045 | -2.154850 |
| C | -4.210664 | -1.960349 | -2.195660 |
| N | -3.955066 | -1.509368 | -0.839767 |
| C | -5.632306 | -3.745572 | -1.225116 |
| H | -5.596219 | -0.824769 | 3.141768  |
| H | -4.852879 | -2.412311 | 3.045190  |
| H | -7.390846 | -1.513977 | 1.593957  |
| H | -7.317038 | -2.682154 | 2.917038  |
| H | -6.136179 | -4.303608 | 1.569155  |
| H | -7.440261 | -3.694197 | 0.553352  |
| H | -5.674939 | -4.813656 | -0.982598 |
| H | -6.578021 | -3.500327 | -1.731334 |
| H | -3.556980 | -3.961854 | -1.789836 |
| H | -4.681030 | -3.854387 | -3.150827 |
| H | -5.072510 | -1.447058 | -2.650882 |
| H | -3.334886 | -1.722368 | -2.803162 |
| H | -3.953917 | 0.352677  | 1.490667  |
| O | 5.251791  | 1.283770  | -1.728130 |
| O | -2.308121 | 0.969153  | -0.316410 |
| C | 5.202002  | 0.539036  | -0.778142 |
| C | 3.945530  | 0.129362  | -0.038871 |
| H | 4.074590  | 0.405143  | 1.013998  |
| H | 3.897881  | -0.965457 | -0.044785 |
| C | 2.671050  | 0.741290  | -0.617589 |
| H | 2.755342  | 1.832848  | -0.604111 |

|   |           |           |           |
|---|-----------|-----------|-----------|
| H | 2.583211  | 0.462673  | -1.672807 |
| C | 1.412045  | 0.308105  | 0.139650  |
| H | 1.507043  | 0.588356  | 1.196863  |
| H | 1.335569  | -0.786963 | 0.124738  |
| C | 0.129237  | 0.916248  | -0.436770 |
| H | 0.193717  | 2.009910  | -0.413716 |
| H | 0.025096  | 0.634831  | -1.491199 |
| C | -1.119869 | 0.468200  | 0.314557  |
| H | -1.092883 | 0.779500  | 1.360870  |
| H | -1.190537 | -0.625471 | 0.312216  |
| O | 6.290648  | -0.043812 | -0.233441 |
| C | 7.566054  | 0.272893  | -0.860520 |
| C | 8.639778  | -0.486549 | -0.135237 |
| H | 7.719830  | 1.351864  | -0.804134 |
| H | 7.509755  | -0.004079 | -1.914614 |
| C | 8.969840  | -1.789844 | -0.519187 |
| C | 9.310146  | 0.089330  | 0.947722  |
| C | 9.951018  | -2.503866 | 0.164209  |
| H | 8.455234  | -2.246904 | -1.359384 |
| C | 10.292688 | -0.621261 | 1.633538  |
| H | 9.061576  | 1.101087  | 1.254691  |
| H | 10.200097 | -3.513538 | -0.145962 |
| C | 10.614717 | -1.919915 | 1.242449  |
| H | 10.808254 | -0.161249 | 2.470325  |
| H | 11.382026 | -2.473784 | 1.773656  |
| H | -3.506097 | -0.605605 | -0.721206 |

75 atoms

addition of another  $\epsilon$ -CL unit to the  $\epsilon$ -CL chain end, structure TS2r, in toluene

|   |           |          |           |
|---|-----------|----------|-----------|
| O | -3.499472 | 1.149355 | 1.690982  |
| O | -4.329272 | 1.827953 | -0.281228 |
| C | -3.170158 | 1.766322 | 0.516766  |
| C | -2.549089 | 3.137914 | 0.832445  |
| H | -1.913361 | 3.444654 | -0.002826 |
| H | -1.891041 | 2.989879 | 1.691260  |
| C | -3.570847 | 4.244345 | 1.141211  |
| H | -4.385794 | 3.832147 | 1.744419  |
| H | -3.082919 | 5.003039 | 1.762439  |
| C | -4.120933 | 4.939001 | -0.114806 |
| H | -3.272846 | 5.337808 | -0.687579 |
| H | -4.714506 | 5.809683 | 0.186302  |
| C | -4.976164 | 4.056187 | -1.032807 |



|   |           |           |           |
|---|-----------|-----------|-----------|
| H | -5.938110 | 3.841195  | -0.553543 |
| H | -5.203582 | 4.605377  | -1.955213 |
| C | -4.345230 | 2.716124  | -1.404520 |
| H | -3.339327 | 2.832223  | -1.820508 |
| H | -4.953645 | 2.216320  | -2.162481 |
| N | -5.360865 | -3.135254 | -0.034429 |
| C | -4.614364 | -1.997272 | 0.181143  |
| N | -4.591016 | -1.323651 | 1.294858  |
| C | -5.363487 | -1.828494 | 2.418981  |
| C | -6.661270 | -2.492225 | 1.963702  |
| C | -6.330217 | -3.592243 | 0.963116  |
| C | -4.192677 | -3.541551 | -2.189586 |
| C | -4.002392 | -2.031081 | -2.214042 |
| N | -3.803300 | -1.580213 | -0.848730 |
| C | -5.379975 | -3.877186 | -1.295739 |
| H | -5.577864 | -0.991596 | 3.090051  |
| H | -4.769633 | -2.547807 | 3.005138  |
| H | -7.300748 | -1.740264 | 1.489899  |
| H | -7.216028 | -2.914593 | 2.806837  |
| H | -5.934534 | -4.477102 | 1.480795  |
| H | -7.235168 | -3.913237 | 0.434641  |
| H | -5.388280 | -4.948010 | -1.061867 |
| H | -6.319721 | -3.664267 | -1.827086 |
| H | -3.282523 | -4.008512 | -1.801864 |
| H | -4.370744 | -3.934953 | -3.193937 |
| H | -4.870494 | -1.548690 | -2.690686 |
| H | -3.119770 | -1.754664 | -2.794770 |
| H | -3.918125 | 0.252820  | 1.498742  |
| O | 5.246801  | 1.160778  | -1.890302 |
| O | -2.259023 | 0.953787  | -0.271187 |
| C | 5.231666  | 0.525245  | -0.862952 |
| C | 3.997271  | 0.162501  | -0.064264 |
| H | 4.146770  | 0.517713  | 0.961482  |
| H | 3.961956  | -0.930348 | 0.012807  |
| C | 2.703101  | 0.715204  | -0.658682 |
| H | 2.774015  | 1.805720  | -0.728234 |
| H | 2.596334  | 0.357885  | -1.688045 |
| C | 1.465558  | 0.327208  | 0.156313  |
| H | 1.580852  | 0.684210  | 1.188070  |
| H | 1.399518  | -0.766613 | 0.222173  |
| C | 0.165344  | 0.882242  | -0.434206 |
| H | 0.219992  | 1.975299  | -0.493264 |
| H | 0.041087  | 0.523599  | -1.462717 |
| C | -1.064866 | 0.486776  | 0.374382  |

|   |           |           |           |
|---|-----------|-----------|-----------|
| H | -1.011929 | 0.872283  | 1.394651  |
| H | -1.136048 | -0.604303 | 0.452252  |
| O | 6.344389  | 0.038008  | -0.274756 |
| C | 7.601264  | 0.319803  | -0.953972 |
| C | 8.710220  | -0.295981 | -0.149817 |
| H | 7.710814  | 1.402139  | -1.040532 |
| H | 7.548993  | -0.094565 | -1.962251 |
| C | 9.123471  | -1.608151 | -0.398138 |
| C | 9.331148  | 0.426051  | 0.873717  |
| C | 10.138011 | -2.188245 | 0.359769  |
| H | 8.647949  | -2.178161 | -1.190979 |
| C | 10.345882 | -0.150378 | 1.634023  |
| H | 9.018028  | 1.446325  | 1.075266  |
| H | 10.451847 | -3.206582 | 0.154409  |
| C | 10.751281 | -1.459475 | 1.377745  |
| H | 10.821995 | 0.422106  | 2.423471  |
| H | 11.544089 | -1.908818 | 1.967031  |
| H | -3.393896 | -0.660401 | -0.712401 |

75 atoms

addition of another  $\epsilon$ -CL unit to the  $\epsilon$ -CL chain end, structure I2r, in toluene

|   |           |           |           |
|---|-----------|-----------|-----------|
| O | -3.760084 | 1.232266  | 1.673662  |
| O | -4.685521 | 1.508278  | -0.349995 |
| C | -3.622817 | 1.899711  | 0.487981  |
| C | -3.564148 | 3.410440  | 0.773205  |
| H | -3.014025 | 3.909283  | -0.030904 |
| H | -2.970633 | 3.529568  | 1.681727  |
| C | -4.936505 | 4.078026  | 0.955113  |
| H | -5.588830 | 3.417649  | 1.534984  |
| H | -4.801886 | 4.982701  | 1.557682  |
| C | -5.608877 | 4.482214  | -0.366821 |
| H | -4.918914 | 5.133688  | -0.920033 |
| H | -6.489928 | 5.096308  | -0.148396 |
| C | -6.034341 | 3.317962  | -1.270191 |
| H | -6.887214 | 2.792931  | -0.824992 |
| H | -6.379875 | 3.712918  | -2.233938 |
| C | -4.945201 | 2.279797  | -1.528117 |
| H | -4.022022 | 2.732571  | -1.903499 |
| H | -5.283887 | 1.562425  | -2.280015 |
| N | -4.099790 | -3.448957 | 0.033714  |
| C | -3.732542 | -2.138712 | 0.248372  |
| N | -3.958715 | -1.472129 | 1.343146  |

|   |           |           |           |
|---|-----------|-----------|-----------|
| C | -4.599314 | -2.165890 | 2.449449  |
| C | -5.620614 | -3.191256 | 1.961755  |
| C | -4.933719 | -4.158315 | 1.005848  |
| C | -2.780414 | -3.516605 | -2.071983 |
| C | -3.043100 | -2.017629 | -2.122148 |
| N | -3.034412 | -1.514555 | -0.760206 |
| C | -3.847048 | -4.179513 | -1.209169 |
| H | -5.082090 | -1.419809 | 3.087369  |
| H | -3.847338 | -2.667786 | 3.078893  |
| H | -6.431309 | -2.669785 | 1.442363  |
| H | -6.063883 | -3.746569 | 2.793729  |
| H | -4.317178 | -4.877451 | 1.562748  |
| H | -5.678086 | -4.741827 | 0.452169  |
| H | -3.544571 | -5.200600 | -0.949707 |
| H | -4.786484 | -4.264381 | -1.775714 |
| H | -1.787478 | -3.689434 | -1.646911 |
| H | -2.798152 | -3.955652 | -3.073004 |
| H | -3.997500 | -1.817667 | -2.634462 |
| H | -2.260700 | -1.499235 | -2.680291 |
| H | -3.842909 | 0.242901  | 1.501990  |
| O | 4.660672  | -0.927776 | -1.733234 |
| O | -2.443015 | 1.459349  | -0.234684 |
| C | 4.834055  | -0.238150 | -0.756455 |
| C | 3.752677  | 0.475202  | 0.027643  |
| H | 4.043910  | 1.527130  | 0.120676  |
| H | 3.772776  | 0.079990  | 1.050125  |
| C | 2.361046  | 0.335567  | -0.586769 |
| H | 2.374536  | 0.732364  | -1.607484 |
| H | 2.113245  | -0.726284 | -0.682912 |
| C | 1.280432  | 1.048560  | 0.231816  |
| H | 1.538429  | 2.111059  | 0.330445  |
| H | 1.269199  | 0.644079  | 1.252036  |
| C | -0.115463 | 0.914807  | -0.384921 |
| H | -0.117992 | 1.337044  | -1.396673 |
| H | -0.378118 | -0.143834 | -0.484784 |
| C | -1.189966 | 1.609593  | 0.439393  |
| H | -0.948463 | 2.674633  | 0.551564  |
| H | -1.258842 | 1.172071  | 1.440315  |
| O | 6.049085  | -0.008857 | -0.215534 |
| C | 7.174792  | -0.654567 | -0.875811 |
| C | 8.428093  | -0.255281 | -0.150934 |
| H | 7.188560  | -0.339572 | -1.920441 |
| H | 7.015189  | -1.734025 | -0.851873 |
| C | 8.895270  | -1.009607 | 0.929370  |

|   |           |           |           |
|---|-----------|-----------|-----------|
| C | 9.134578  | 0.889248  | -0.532166 |
| C | 10.046432 | -0.629453 | 1.615279  |
| H | 8.354080  | -1.900666 | 1.233987  |
| C | 10.286161 | 1.272821  | 0.151072  |
| H | 8.780506  | 1.482547  | -1.370200 |
| H | 10.400416 | -1.225624 | 2.450101  |
| C | 10.744206 | 0.513224  | 1.226638  |
| H | 10.827292 | 2.161539  | -0.157205 |
| H | 11.643100 | 0.808925  | 1.757934  |
| H | -2.923636 | -0.513870 | -0.630404 |

75 atoms

addition of another  $\epsilon$ -CL unit to the  $\epsilon$ -CL chain end, structure TS23, in toluene

|   |           |           |           |
|---|-----------|-----------|-----------|
| O | -2.762887 | 0.393903  | 1.144105  |
| O | -3.649891 | 1.341444  | -0.692184 |
| C | -2.646352 | 1.474571  | 0.298845  |
| C | -2.745142 | 2.800258  | 1.086589  |
| H | -2.247031 | 3.600261  | 0.528897  |
| H | -2.164453 | 2.647661  | 1.998726  |
| C | -4.178324 | 3.225776  | 1.440691  |
| H | -4.770581 | 2.341896  | 1.701447  |
| H | -4.148107 | 3.849956  | 2.340094  |
| C | -4.870140 | 4.027830  | 0.326354  |
| H | -4.245822 | 4.899974  | 0.090913  |
| H | -5.816918 | 4.430107  | 0.704297  |
| C | -5.150435 | 3.247517  | -0.964343 |
| H | -5.958525 | 2.526570  | -0.795564 |
| H | -5.506979 | 3.939248  | -1.737847 |
| C | -3.956972 | 2.473026  | -1.517853 |
| H | -3.070042 | 3.100274  | -1.642400 |
| H | -4.199468 | 2.060887  | -2.500598 |
| N | -6.671449 | -2.448571 | 0.165546  |
| C | -5.634154 | -1.544785 | 0.133403  |
| N | -5.097936 | -0.986896 | 1.181570  |
| C | -5.576726 | -1.389465 | 2.494151  |
| C | -7.072610 | -1.697164 | 2.482612  |
| C | -7.353921 | -2.756411 | 1.423703  |
| C | -6.341417 | -2.962380 | -2.239972 |
| C | -5.787893 | -1.547132 | -2.338263 |
| N | -5.101025 | -1.242788 | -1.096755 |
| C | -7.259994 | -3.056788 | -1.028006 |
| H | -5.355708 | -0.585099 | 3.201749  |

|   |           |           |           |
|---|-----------|-----------|-----------|
| H | -5.025073 | -2.272765 | 2.853055  |
| H | -7.626416 | -0.782202 | 2.246878  |
| H | -7.418574 | -2.050151 | 3.458630  |
| H | -7.041079 | -3.748043 | 1.778656  |
| H | -8.428999 | -2.817254 | 1.220052  |
| H | -7.480304 | -4.105997 | -0.801417 |
| H | -8.223577 | -2.572940 | -1.247756 |
| H | -5.508528 | -3.663974 | -2.137557 |
| H | -6.898441 | -3.230957 | -3.141386 |
| H | -6.604652 | -0.838187 | -2.549552 |
| H | -5.067662 | -1.464551 | -3.155224 |
| H | -3.657789 | -0.064728 | 1.083230  |
| O | 5.801760  | -0.254291 | -2.233601 |
| O | -1.418695 | 1.410283  | -0.419673 |
| C | 5.882353  | -0.092289 | -1.039181 |
| C | 4.741570  | 0.281750  | -0.116420 |
| H | 5.013474  | 1.219564  | 0.381865  |
| H | 4.699658  | -0.466216 | 0.683210  |
| C | 3.396099  | 0.406449  | -0.828986 |
| H | 3.479504  | 1.145269  | -1.632629 |
| H | 3.157557  | -0.542392 | -1.320575 |
| C | 2.259314  | 0.797447  | 0.120316  |
| H | 2.506072  | 1.747637  | 0.612073  |
| H | 2.181776  | 0.053129  | 0.923367  |
| C | 0.908474  | 0.923540  | -0.590192 |
| H | 0.972755  | 1.675715  | -1.385092 |
| H | 0.649629  | -0.022456 | -1.078094 |
| C | -0.224267 | 1.302955  | 0.352719  |
| H | -0.000071 | 2.258697  | 0.848125  |
| H | -0.355446 | 0.542211  | 1.127818  |
| O | 7.034891  | -0.224200 | -0.348404 |
| C | 8.210140  | -0.580904 | -1.130058 |
| C | 9.378249  | -0.679560 | -0.191110 |
| H | 8.362889  | 0.183942  | -1.893348 |
| H | 8.012323  | -1.527001 | -1.636848 |
| C | 9.663979  | -1.882177 | 0.462227  |
| C | 10.184359 | 0.434369  | 0.060331  |
| C | 10.734348 | -1.971063 | 1.348860  |
| H | 9.044037  | -2.753947 | 0.274118  |
| C | 11.256346 | 0.349490  | 0.945922  |
| H | 9.971302  | 1.373658  | -0.441678 |
| H | 10.947297 | -2.911287 | 1.847188  |
| C | 11.533074 | -0.854382 | 1.591924  |
| H | 11.876565 | 1.220879  | 1.129512  |

|   |           |           |           |
|---|-----------|-----------|-----------|
| H | 12.369596 | -0.923048 | 2.279873  |
| H | -4.472487 | -0.446550 | -1.076240 |

75 atoms

addition of another  $\epsilon$ -CL unit to the  $\epsilon$ -CL chain end, structure I3, in toluene

|   |           |           |           |
|---|-----------|-----------|-----------|
| O | -2.660350 | -0.283528 | 0.523298  |
| O | -3.487440 | 1.404094  | -0.702404 |
| C | -2.534773 | 1.069236  | 0.299509  |
| C | -2.708125 | 1.909481  | 1.590679  |
| H | -2.151176 | 2.846597  | 1.484173  |
| H | -2.214319 | 1.346999  | 2.386293  |
| C | -4.159204 | 2.221935  | 1.991989  |
| H | -4.792559 | 1.345858  | 1.817634  |
| H | -4.184419 | 2.409903  | 3.071064  |
| C | -4.739930 | 3.456753  | 1.283293  |
| H | -4.077000 | 4.310779  | 1.476761  |
| H | -5.702111 | 3.714813  | 1.740411  |
| C | -4.940429 | 3.310871  | -0.230359 |
| H | -5.772622 | 2.626175  | -0.431185 |
| H | -5.227596 | 4.281149  | -0.654740 |
| C | -3.722253 | 2.789457  | -0.988362 |
| H | -2.821223 | 3.373312  | -0.780518 |
| H | -3.897205 | 2.841525  | -2.065951 |
| N | -7.099372 | -2.093449 | -0.147555 |
| C | -5.951812 | -1.335423 | -0.103273 |
| N | -5.203415 | -1.177405 | 0.954730  |
| C | -5.562022 | -1.905752 | 2.160820  |
| C | -7.075875 | -2.030820 | 2.319954  |
| C | -7.653811 | -2.685106 | 1.071232  |
| C | -7.136547 | -1.947620 | -2.623174 |
| C | -6.405879 | -0.624428 | -2.437452 |
| N | -5.554892 | -0.731903 | -1.268262 |
| C | -7.910739 | -2.272213 | -1.351958 |
| H | -5.129779 | -1.383309 | 3.019503  |
| H | -5.111530 | -2.910998 | 2.155861  |
| H | -7.508164 | -1.032885 | 2.448952  |
| H | -7.340670 | -2.621571 | 3.201886  |
| H | -7.456893 | -3.766061 | 1.076995  |
| H | -8.742407 | -2.561392 | 1.043500  |
| H | -8.257787 | -3.311240 | -1.375451 |
| H | -8.809541 | -1.640862 | -1.286404 |
| H | -6.404933 | -2.734133 | -2.829698 |

|   |           |           |           |
|---|-----------|-----------|-----------|
| H | -7.827155 | -1.899859 | -3.469186 |
| H | -7.134797 | 0.196728  | -2.347370 |
| H | -5.773137 | -0.401794 | -3.299296 |
| H | -3.605036 | -0.542876 | 0.746263  |
| O | 6.116166  | 0.801783  | -2.125639 |
| O | -1.273983 | 1.315017  | -0.295250 |
| C | 6.113024  | 0.372273  | -0.996584 |
| C | 4.901070  | 0.252801  | -0.096828 |
| H | 5.099945  | 0.843522  | 0.805000  |
| H | 4.841660  | -0.785577 | 0.247793  |
| C | 3.598736  | 0.689778  | -0.765079 |
| H | 3.701109  | 1.721262  | -1.117305 |
| H | 3.430486  | 0.084178  | -1.661642 |
| C | 2.390388  | 0.577025  | 0.169560  |
| H | 2.564404  | 1.188746  | 1.064641  |
| H | 2.298498  | -0.457706 | 0.524220  |
| C | 1.079997  | 1.004934  | -0.497805 |
| H | 1.157816  | 2.041524  | -0.845612 |
| H | 0.892286  | 0.392192  | -1.386133 |
| C | -0.120754 | 0.887137  | 0.429347  |
| H | 0.026411  | 1.513050  | 1.320881  |
| H | -0.257252 | -0.146516 | 0.759640  |
| O | 7.223210  | -0.068065 | -0.366748 |
| C | 8.459595  | -0.002188 | -1.132373 |
| C | 9.568810  | -0.529906 | -0.267995 |
| H | 8.629560  | 1.034585  | -1.427170 |
| H | 8.332965  | -0.593482 | -2.041056 |
| C | 9.830097  | -1.902372 | -0.209291 |
| C | 10.342976 | 0.339049  | 0.505891  |
| C | 10.844840 | -2.397211 | 0.605890  |
| H | 9.234628  | -2.586556 | -0.806741 |
| C | 11.360099 | -0.151872 | 1.321822  |
| H | 10.148825 | 1.407003  | 0.468187  |
| H | 11.039339 | -3.464309 | 0.640065  |
| C | 11.612490 | -1.521654 | 1.373141  |
| H | 11.956276 | 0.534088  | 1.914882  |
| H | 12.406132 | -1.905525 | 2.006014  |
| H | -4.777912 | -0.087429 | -1.169173 |

75 atoms

addition of another  $\epsilon$ -CL unit to the  $\epsilon$ -CL chain end, structure TS3r, in toluene

|   |          |           |           |
|---|----------|-----------|-----------|
| O | 2.663221 | -0.020534 | -0.801426 |
|---|----------|-----------|-----------|

|   |           |           |           |
|---|-----------|-----------|-----------|
| O | 3.460973  | 1.332281  | 0.801264  |
| C | 2.605725  | 1.271750  | -0.344874 |
| C | 2.983528  | 2.315889  | -1.420153 |
| H | 2.514923  | 3.269763  | -1.159919 |
| H | 2.492353  | 1.976086  | -2.336053 |
| C | 4.487238  | 2.524873  | -1.657329 |
| H | 5.013596  | 1.566000  | -1.602467 |
| H | 4.631796  | 2.897121  | -2.677555 |
| C | 5.116546  | 3.539187  | -0.688141 |
| H | 4.568602  | 4.486851  | -0.776323 |
| H | 6.142862  | 3.755561  | -1.006466 |
| C | 5.141454  | 3.111093  | 0.784991  |
| H | 5.873622  | 2.307519  | 0.926486  |
| H | 5.482308  | 3.952826  | 1.401011  |
| C | 3.805360  | 2.616372  | 1.336490  |
| H | 2.994393  | 3.329209  | 1.161298  |
| H | 3.876891  | 2.472953  | 2.417780  |
| N | 6.841542  | -2.328785 | 0.068016  |
| C | 5.762779  | -1.475828 | 0.036677  |
| N | 5.145663  | -1.094475 | -1.048674 |
| C | 5.579728  | -1.656933 | -2.317328 |
| C | 7.088787  | -1.889654 | -2.348357 |
| C | 7.478855  | -2.775845 | -1.171925 |
| C | 6.625843  | -2.559237 | 2.528064  |
| C | 6.014053  | -1.165274 | 2.485580  |
| N | 5.285248  | -1.023652 | 1.239690  |
| C | 7.506012  | -2.754878 | 1.300134  |
| H | 5.281968  | -0.971929 | -3.116724 |
| H | 5.059734  | -2.606829 | -2.518705 |
| H | 7.603667  | -0.926068 | -2.272733 |
| H | 7.404217  | -2.359671 | -3.284517 |
| H | 7.204169  | -3.821130 | -1.369741 |
| H | 8.564185  | -2.756170 | -1.021514 |
| H | 7.774859  | -3.811498 | 1.191959  |
| H | 8.448577  | -2.200013 | 1.419762  |
| H | 5.823014  | -3.302228 | 2.538242  |
| H | 7.224348  | -2.698276 | 3.432139  |
| H | 6.804545  | -0.405667 | 2.593944  |
| H | 5.311583  | -1.020368 | 3.309219  |
| H | 3.611088  | -0.341442 | -0.919199 |
| O | -6.218431 | 1.731542  | 1.415792  |
| O | 1.291837  | 1.563689  | 0.106330  |
| C | -6.123557 | 0.802341  | 0.649674  |
| C | -4.839375 | 0.287449  | 0.034445  |



|   |            |           |           |
|---|------------|-----------|-----------|
| H | -4.964589  | 0.296860  | -1.054241 |
| H | -4.744766  | -0.771046 | 0.302718  |
| C | -3.600116  | 1.075347  | 0.455386  |
| H | -3.728326  | 2.127227  | 0.179611  |
| H | -3.515851  | 1.061919  | 1.546901  |
| C | -2.313591  | 0.528243  | -0.170680 |
| H | -2.406983  | 0.539171  | -1.264535 |
| H | -2.190402  | -0.525594 | 0.110754  |
| C | -1.067420  | 1.315845  | 0.244629  |
| H | -1.175353  | 2.367687  | -0.043766 |
| H | -0.962287  | 1.302735  | 1.335433  |
| C | 0.209805   | 0.763464  | -0.370968 |
| H | 0.157044   | 0.803437  | -1.466785 |
| H | 0.358828   | -0.281805 | -0.087902 |
| O | -7.181553  | 0.076636  | 0.228713  |
| C | -8.478538  | 0.472965  | 0.757867  |
| C | -9.514981  | -0.449507 | 0.182739  |
| H | -8.660369  | 1.513507  | 0.483564  |
| H | -8.438713  | 0.414345  | 1.846911  |
| C | -9.829849  | -1.651349 | 0.823922  |
| C | -10.164967 | -0.131032 | -1.013160 |
| C | -10.776082 | -2.518023 | 0.282297  |
| H | -9.330865  | -1.908662 | 1.753694  |
| C | -11.112134 | -0.994954 | -1.558091 |
| H | -9.928044  | 0.800010  | -1.519787 |
| H | -11.013752 | -3.446286 | 0.791756  |
| C | -11.419345 | -2.190645 | -0.910585 |
| H | -11.611957 | -0.734130 | -2.485371 |
| H | -12.159314 | -2.863290 | -1.332182 |
| H | 4.578305   | -0.299155 | 1.166876  |

75 atoms

addition of another  $\epsilon$ -CL unit to the  $\epsilon$ -CL chain end, structure I3r, in toluene

|   |          |          |           |
|---|----------|----------|-----------|
| O | 2.967856 | 0.697646 | -1.406007 |
| O | 3.069136 | 1.092703 | 0.802067  |
| C | 2.784524 | 1.698046 | -0.480453 |
| C | 3.638515 | 2.952141 | -0.754841 |
| H | 3.134213 | 3.822121 | -0.323563 |
| H | 3.604560 | 3.085814 | -1.838248 |
| C | 5.091461 | 2.892062 | -0.261154 |
| H | 5.507522 | 1.894436 | -0.437676 |
| H | 5.688016 | 3.583599 | -0.866023 |

|   |           |           |           |
|---|-----------|-----------|-----------|
| C | 5.256080  | 3.290855  | 1.214504  |
| H | 4.822574  | 4.290239  | 1.353193  |
| H | 6.322973  | 3.392197  | 1.444524  |
| C | 4.626628  | 2.327320  | 2.228405  |
| H | 5.205298  | 1.396985  | 2.266651  |
| H | 4.682324  | 2.768196  | 3.231723  |
| C | 3.173606  | 1.954910  | 1.941324  |
| H | 2.541053  | 2.837188  | 1.802265  |
| H | 2.758384  | 1.390533  | 2.781074  |
| N | 6.339493  | -2.627256 | -0.192169 |
| C | 5.402988  | -1.620005 | -0.219822 |
| N | 5.271862  | -0.749068 | -1.181916 |
| C | 6.130129  | -0.881826 | -2.348253 |
| C | 7.519769  | -1.394090 | -1.975432 |
| C | 7.378469  | -2.710152 | -1.220541 |
| C | 5.191805  | -3.684013 | 1.736614  |
| C | 4.719038  | -2.275656 | 2.072083  |
| N | 4.521427  | -1.553386 | 0.829897  |
| C | 6.459580  | -3.597854 | 0.896169  |
| H | 6.200206  | 0.094806  | -2.836068 |
| H | 5.676616  | -1.560956 | -3.087316 |
| H | 8.018005  | -0.654472 | -1.339772 |
| H | 8.144784  | -1.542274 | -2.860973 |
| H | 7.143521  | -3.528760 | -1.914655 |
| H | 8.322043  | -2.972257 | -0.728717 |
| H | 6.688254  | -4.574714 | 0.455767  |
| H | 7.316158  | -3.330691 | 1.532998  |
| H | 4.405317  | -4.201795 | 1.179868  |
| H | 5.394468  | -4.257606 | 2.644821  |
| H | 5.451314  | -1.781272 | 2.730250  |
| H | 3.767464  | -2.299521 | 2.607818  |
| H | 3.845562  | 0.224022  | -1.286302 |
| O | -6.151922 | 2.315747  | 0.177998  |
| O | 1.453935  | 2.138523  | -0.521784 |
| C | -5.945866 | 1.139195  | -0.002424 |
| C | -4.588789 | 0.495836  | -0.194462 |
| H | -4.616297 | -0.067542 | -1.133872 |
| H | -4.467949 | -0.260458 | 0.589833  |
| C | -3.431234 | 1.492665  | -0.180658 |
| H | -3.579982 | 2.231846  | -0.974613 |
| H | -3.449708 | 2.055976  | 0.757957  |
| C | -2.069104 | 0.813597  | -0.352627 |
| H | -2.059161 | 0.247054  | -1.292667 |
| H | -1.927992 | 0.073728  | 0.446308  |

|   |            |           |           |
|---|------------|-----------|-----------|
| C | -0.901117  | 1.804433  | -0.343157 |
| H | -1.022699  | 2.533311  | -1.152564 |
| H | -0.903205  | 2.376484  | 0.591920  |
| C | 0.447185   | 1.118950  | -0.502434 |
| H | 0.489792   | 0.545340  | -1.432241 |
| H | 0.635892   | 0.429058  | 0.327125  |
| O | -6.927091  | 0.213233  | -0.055383 |
| C | -8.283581  | 0.708957  | 0.127285  |
| C | -9.218782  | -0.463925 | 0.052338  |
| H | -8.490435  | 1.446373  | -0.650003 |
| H | -8.337945  | 1.214409  | 1.093162  |
| C | -9.483832  | -1.233188 | 1.189614  |
| C | -9.820818  | -0.817828 | -1.158264 |
| C | -10.334091 | -2.333731 | 1.119365  |
| H | -9.021253  | -0.966907 | 2.135560  |
| C | -10.673212 | -1.917459 | -1.232522 |
| H | -9.621545  | -0.227787 | -2.048079 |
| H | -10.533989 | -2.920695 | 2.010006  |
| C | -10.930951 | -2.677653 | -0.093100 |
| H | -11.137078 | -2.179245 | -2.178024 |
| H | -11.596719 | -3.532893 | -0.148560 |
| H | 3.944445   | -0.718218 | 0.835952  |

75 atoms

addition of another  $\epsilon$ -CL unit to the  $\epsilon$ -CL chain end, structure TS34, in toluene

|   |           |           |           |
|---|-----------|-----------|-----------|
| O | -3.252122 | -1.036627 | -1.579450 |
| O | -3.417662 | -1.216949 | 0.907000  |
| C | -3.040159 | -2.006896 | -0.827701 |
| C | -3.958007 | -3.222952 | -0.804492 |
| H | -3.530614 | -3.985533 | -0.149502 |
| H | -3.893429 | -3.627369 | -1.822306 |
| C | -5.428203 | -2.956194 | -0.443948 |
| H | -5.681472 | -1.920981 | -0.692138 |
| H | -6.061560 | -3.584499 | -1.080876 |
| C | -5.793610 | -3.268625 | 1.018118  |
| H | -5.441064 | -4.283500 | 1.248230  |
| H | -6.887081 | -3.311782 | 1.102795  |
| C | -5.263235 | -2.301878 | 2.085581  |
| H | -5.796504 | -1.344971 | 2.007813  |
| H | -5.505481 | -2.710826 | 3.077172  |
| C | -3.757616 | -1.997978 | 2.008420  |
| H | -3.189519 | -2.946309 | 2.010268  |

|   |           |           |           |
|---|-----------|-----------|-----------|
| H | -3.465363 | -1.485231 | 2.944914  |
| N | -5.320767 | 3.092436  | -0.025163 |
| C | -4.786389 | 1.846027  | -0.081109 |
| N | -4.875533 | 1.120982  | -1.207069 |
| C | -5.408601 | 1.661683  | -2.448466 |
| C | -6.540875 | 2.627377  | -2.128466 |
| C | -6.038620 | 3.689096  | -1.158181 |
| C | -4.008573 | 3.498661  | 2.028953  |
| C | -4.067067 | 1.993204  | 2.250732  |
| N | -4.172748 | 1.308170  | 0.971172  |
| C | -5.194117 | 3.928474  | 1.174093  |
| H | -5.759175 | 0.823431  | -3.052404 |
| H | -4.622615 | 2.170513  | -3.022477 |
| H | -7.374132 | 2.077228  | -1.681398 |
| H | -6.908851 | 3.108157  | -3.037673 |
| H | -5.379149 | 4.400777  | -1.671369 |
| H | -6.877852 | 4.261710  | -0.753020 |
| H | -5.069188 | 4.962978  | 0.842525  |
| H | -6.126162 | 3.883562  | 1.751943  |
| H | -3.073662 | 3.758487  | 1.523388  |
| H | -4.030729 | 4.032094  | 2.982110  |
| H | -4.916328 | 1.738151  | 2.898703  |
| H | -3.164001 | 1.631761  | 2.746021  |
| H | -4.308720 | 0.255496  | -1.270125 |
| O | 5.848827  | -2.470501 | 0.276347  |
| O | -1.749724 | -2.429599 | -0.595432 |
| C | 5.629533  | -1.312115 | 0.013584  |
| C | 4.273374  | -0.712797 | -0.292657 |
| H | 4.323483  | -0.281714 | -1.299446 |
| H | 4.126456  | 0.141334  | 0.377790  |
| C | 3.121793  | -1.710247 | -0.179306 |
| H | 3.308481  | -2.556604 | -0.848037 |
| H | 3.102709  | -2.128694 | 0.832419  |
| C | 1.764727  | -1.079272 | -0.505140 |
| H | 1.791507  | -0.661840 | -1.520292 |
| H | 1.587880  | -0.228271 | 0.165769  |
| C | 0.599728  | -2.067046 | -0.391149 |
| H | 0.759490  | -2.913016 | -1.069922 |
| H | 0.560839  | -2.484529 | 0.621255  |
| C | -0.740544 | -1.424808 | -0.711799 |
| H | -0.749990 | -1.008841 | -1.724100 |
| H | -0.972760 | -0.615817 | -0.012439 |
| O | 6.594821  | -0.369295 | -0.046966 |
| C | 7.950193  | -0.825333 | 0.224352  |

|   |           |           |           |
|---|-----------|-----------|-----------|
| C | 8.865811  | 0.361325  | 0.126574  |
| H | 8.206263  | -1.599442 | -0.501080 |
| H | 7.969890  | -1.276272 | 1.217985  |
| C | 9.106324  | 1.166525  | 1.243980  |
| C | 9.473686  | 0.691832  | -1.087996 |
| C | 9.938662  | 2.279343  | 1.150895  |
| H | 8.639181  | 0.918761  | 2.192709  |
| C | 10.307189 | 1.803767  | -1.185263 |
| H | 9.293639  | 0.073310  | -1.962437 |
| H | 10.119963 | 2.894021  | 2.026702  |
| C | 10.541039 | 2.599779  | -0.065027 |
| H | 10.775876 | 2.047095  | -2.133333 |
| H | 11.192758 | 3.464462  | -0.138286 |
| H | -3.861446 | 0.279630  | 0.920109  |

75 atoms

addition of another  $\epsilon$ -CL unit to the  $\epsilon$ -CL chain end, structure I4, in toluene

|   |           |           |           |
|---|-----------|-----------|-----------|
| O | -3.249518 | -1.315805 | -1.613573 |
| O | -3.805260 | -1.339918 | 1.480976  |
| C | -2.984626 | -2.331701 | -1.003822 |
| C | -3.951917 | -3.436092 | -0.644905 |
| H | -3.705967 | -3.756090 | 0.367935  |
| H | -3.697536 | -4.285736 | -1.290110 |
| C | -5.440068 | -3.066848 | -0.791198 |
| H | -5.520716 | -2.056847 | -1.200855 |
| H | -5.890817 | -3.726092 | -1.539707 |
| C | -6.280729 | -3.169363 | 0.495138  |
| H | -6.043031 | -4.108105 | 1.014171  |
| H | -7.330942 | -3.261993 | 0.193745  |
| C | -6.198870 | -2.001391 | 1.492765  |
| H | -6.432591 | -1.060967 | 0.978890  |
| H | -6.993760 | -2.145822 | 2.237392  |
| C | -4.885402 | -1.818193 | 2.262276  |
| H | -4.570357 | -2.776679 | 2.692295  |
| H | -5.071789 | -1.139859 | 3.108413  |
| N | -4.922764 | 3.330253  | -0.085598 |
| C | -4.603552 | 1.993869  | 0.014215  |
| N | -4.721457 | 1.236846  | -1.130993 |
| C | -4.771367 | 1.846599  | -2.448813 |
| C | -5.764260 | 2.998975  | -2.398698 |
| C | -5.320316 | 3.990095  | -1.330329 |
| C | -3.792893 | 3.619777  | 2.087803  |

|   |           |           |           |
|---|-----------|-----------|-----------|
| C | -4.200572 | 2.169944  | 2.339320  |
| N | -4.241588 | 1.392396  | 1.110373  |
| C | -4.736314 | 4.226246  | 1.056896  |
| H | -5.086085 | 1.082457  | -3.162067 |
| H | -3.784935 | 2.211371  | -2.776521 |
| H | -6.756430 | 2.604478  | -2.160500 |
| H | -5.828099 | 3.508200  | -3.363913 |
| H | -4.480589 | 4.594334  | -1.705138 |
| H | -6.132012 | 4.689789  | -1.100528 |
| H | -4.334327 | 5.173876  | 0.681272  |
| H | -5.710411 | 4.452766  | 1.512215  |
| H | -2.765802 | 3.644859  | 1.708396  |
| H | -3.819706 | 4.211057  | 3.007933  |
| H | -5.180338 | 2.150322  | 2.843019  |
| H | -3.496741 | 1.688017  | 3.024540  |
| H | -4.268207 | 0.332234  | -1.076322 |
| O | 5.753486  | -2.403923 | 0.845281  |
| O | -1.738221 | -2.644669 | -0.618785 |
| C | 5.573528  | -1.333600 | 0.315055  |
| C | 4.247745  | -0.810370 | -0.196648 |
| H | 4.376408  | -0.556394 | -1.254884 |
| H | 4.051020  | 0.143500  | 0.305949  |
| C | 3.089916  | -1.786936 | 0.000790  |
| H | 3.323718  | -2.732110 | -0.499826 |
| H | 2.996277  | -2.027888 | 1.064506  |
| C | 1.761406  | -1.235747 | -0.525714 |
| H | 1.863234  | -0.994724 | -1.591830 |
| H | 1.533432  | -0.288044 | -0.021366 |
| C | 0.595874  | -2.210831 | -0.330214 |
| H | 0.810677  | -3.157571 | -0.838325 |
| H | 0.477369  | -2.445389 | 0.732876  |
| C | -0.713796 | -1.653180 | -0.857212 |
| H | -0.666099 | -1.441593 | -1.928686 |
| H | -0.999913 | -0.731976 | -0.343889 |
| O | 6.557216  | -0.434628 | 0.101603  |
| C | 7.885832  | -0.820364 | 0.556051  |
| C | 8.829739  | 0.301453  | 0.229833  |
| H | 8.165883  | -1.748888 | 0.055768  |
| H | 7.839140  | -1.016838 | 1.628593  |
| C | 9.020813  | 1.353062  | 1.131135  |
| C | 9.514172  | 0.322896  | -0.988813 |
| C | 9.879377  | 2.405260  | 0.822156  |
| H | 8.494261  | 1.346301  | 2.081051  |
| C | 10.374217 | 1.373191  | -1.301450 |

|   |           |           |           |
|---|-----------|-----------|-----------|
| H | 9.373300  | -0.488914 | -1.696475 |
| H | 10.021580 | 3.213703  | 1.532009  |
| C | 10.558047 | 2.416796  | -0.395739 |
| H | 10.902422 | 1.375828  | -2.249434 |
| H | 11.230168 | 3.234150  | -0.636402 |
| H | -3.948552 | -0.374917 | 1.306053  |

75 atoms

addition of another  $\epsilon$ -CL unit to the  $\epsilon$ -CL chain end, structure I5, in toluene

|   |           |           |           |
|---|-----------|-----------|-----------|
| O | 0.770891  | 0.484172  | -0.694008 |
| O | 7.943226  | -2.425518 | -0.434730 |
| C | 0.580482  | -0.662578 | -0.365284 |
| C | 1.650601  | -1.711010 | -0.145998 |
| H | 1.420826  | -2.561599 | -0.797961 |
| H | 1.536310  | -2.093520 | 0.874834  |
| C | 3.070081  | -1.200094 | -0.386859 |
| H | 3.147640  | -0.814407 | -1.408712 |
| H | 3.263995  | -0.345254 | 0.269197  |
| C | 4.132016  | -2.280330 | -0.158698 |
| H | 3.928058  | -3.135822 | -0.816573 |
| H | 4.046914  | -2.663355 | 0.866920  |
| C | 5.560087  | -1.782165 | -0.400135 |
| H | 5.653175  | -1.400283 | -1.424084 |
| H | 5.779867  | -0.939147 | 0.264853  |
| C | 6.616862  | -2.868104 | -0.186412 |
| H | 6.434882  | -3.703150 | -0.871408 |
| H | 6.531522  | -3.268898 | 0.835148  |
| N | 9.596642  | 1.898007  | 0.364600  |
| C | 9.018408  | 0.673788  | 0.118768  |
| N | 8.666707  | 0.400414  | -1.185622 |
| C | 9.213011  | 1.143064  | -2.306555 |
| C | 9.142292  | 2.625983  | -1.967003 |
| C | 9.909232  | 2.879979  | -0.675016 |
| C | 10.266506 | 0.980186  | 2.555875  |
| C | 9.026655  | 0.098977  | 2.412922  |
| N | 8.746003  | -0.223349 | 1.023340  |
| C | 10.089577 | 2.230306  | 1.702702  |
| H | 8.614419  | 0.914477  | -3.190855 |
| H | 10.252269 | 0.855742  | -2.531799 |
| H | 8.093785  | 2.913675  | -1.847137 |
| H | 9.568556  | 3.234976  | -2.768502 |
| H | 10.991515 | 2.867189  | -0.872735 |

|   |            |           |           |
|---|------------|-----------|-----------|
| H | 9.673310   | 3.876267  | -0.284417 |
| H | 11.045142  | 2.754814  | 1.591121  |
| H | 9.396346   | 2.932144  | 2.186468  |
| H | 11.144868  | 0.421932  | 2.215125  |
| H | 10.440240  | 1.265482  | 3.597707  |
| H | 8.164121   | 0.605732  | 2.874433  |
| H | 9.159562   | -0.837023 | 2.963483  |
| H | 8.389430   | -0.563781 | -1.331739 |
| O | -8.210828  | -2.063463 | 0.416908  |
| O | -0.647508  | -1.176430 | -0.143412 |
| C | -8.122548  | -0.881037 | 0.185724  |
| C | -6.835553  | -0.121287 | -0.059574 |
| H | -6.815155  | 0.734084  | 0.624505  |
| H | -6.896476  | 0.314653  | -1.063596 |
| C | -5.583118  | -0.982917 | 0.090190  |
| H | -5.551549  | -1.403851 | 1.100523  |
| H | -5.649894  | -1.839511 | -0.587928 |
| C | -4.295707  | -0.200445 | -0.186162 |
| H | -4.236972  | 0.659475  | 0.493216  |
| H | -4.333235  | 0.217152  | -1.200448 |
| C | -3.036472  | -1.060178 | -0.033213 |
| H | -2.982546  | -1.467780 | 0.982178  |
| H | -3.084451  | -1.918419 | -0.712349 |
| C | -1.767955  | -0.276867 | -0.318219 |
| H | -1.648648  | 0.569869  | 0.362745  |
| H | -1.749629  | 0.113572  | -1.338932 |
| O | -9.187528  | -0.056582 | 0.108249  |
| C | -10.490640 | -0.674172 | 0.313007  |
| C | -11.534901 | 0.398899  | 0.196472  |
| H | -10.498023 | -1.146558 | 1.296555  |
| H | -10.621817 | -1.456083 | -0.437130 |
| C | -12.066216 | 0.739622  | -1.051170 |
| C | -11.976066 | 1.087510  | 1.329981  |
| C | -13.020012 | 1.748000  | -1.164602 |
| H | -11.730842 | 0.210499  | -1.938404 |
| C | -12.930686 | 2.096267  | 1.220909  |
| H | -11.570381 | 0.830809  | 2.304220  |
| H | -13.427001 | 2.000585  | -2.138371 |
| C | -13.454292 | 2.428230  | -0.027536 |
| H | -13.267439 | 2.620580  | 2.109352  |
| H | -14.200251 | 3.211675  | -0.113955 |
| H | 8.206218   | -1.767630 | 0.259474  |



80 atoms

addition of another  $\epsilon$ -CL unit to the 3-isomer chain end,  
structure I1, in toluene

|   |           |           |           |
|---|-----------|-----------|-----------|
| O | -4.868019 | -1.021951 | 1.785603  |
| O | -5.453393 | -0.750262 | -0.310797 |
| C | -5.042924 | -1.538340 | 0.701976  |
| C | -4.873113 | -3.024641 | 0.468373  |
| H | -4.020794 | -3.163340 | -0.204158 |
| H | -4.587514 | -3.438370 | 1.435526  |
| C | -6.117386 | -3.752749 | -0.078169 |
| H | -7.008327 | -3.425775 | 0.470820  |
| H | -6.002115 | -4.818017 | 0.144320  |
| C | -6.336015 | -3.591193 | -1.586153 |
| H | -5.469358 | -4.009082 | -2.114199 |
| H | -7.197374 | -4.195851 | -1.889602 |
| C | -6.549898 | -2.147058 | -2.049500 |
| H | -7.484166 | -1.745150 | -1.640145 |
| H | -6.661500 | -2.133719 | -3.139900 |
| C | -5.418736 | -1.191005 | -1.691437 |
| H | -4.429327 | -1.602983 | -1.899553 |
| H | -5.517616 | -0.259601 | -2.248113 |
| N | -3.217306 | 3.770086  | 0.287416  |
| C | -3.172431 | 2.395800  | 0.388913  |
| N | -3.884194 | 1.828763  | 1.417639  |
| C | -4.951051 | 2.541054  | 2.097975  |
| C | -4.440590 | 3.931734  | 2.446121  |
| C | -4.007943 | 4.634704  | 1.165636  |
| C | -2.267717 | 3.500202  | -1.974997 |
| C | -1.629702 | 2.240016  | -1.396040 |
| N | -2.474106 | 1.616572  | -0.388578 |
| C | -2.579729 | 4.460451  | -0.834810 |
| H | -5.212298 | 1.975776  | 2.994128  |
| H | -5.860728 | 2.611801  | 1.481166  |
| H | -3.593831 | 3.838471  | 3.132391  |
| H | -5.212379 | 4.525065  | 2.943626  |
| H | -4.892870 | 4.991951  | 0.617937  |
| H | -3.407300 | 5.520735  | 1.401873  |
| H | -3.257366 | 5.251787  | -1.175505 |
| H | -1.662501 | 4.956528  | -0.488160 |
| H | -3.192386 | 3.228577  | -2.495053 |
| H | -1.611114 | 3.988880  | -2.701116 |
| H | -0.643603 | 2.493960  | -0.974454 |
| H | -1.442988 | 1.506969  | -2.186620 |
| H | -3.995306 | 0.823580  | 1.362108  |

|   |           |           |           |
|---|-----------|-----------|-----------|
| O | 5.600483  | -2.735223 | -1.175433 |
| C | 5.075781  | -1.975892 | -0.395485 |
| O | -2.346886 | -1.141139 | -0.520470 |
| C | -1.250073 | -1.536206 | 0.285699  |
| H | -1.185999 | -0.904614 | 1.182840  |
| H | -1.447003 | -2.559095 | 0.628868  |
| C | 0.080145  | -1.498981 | -0.470568 |
| H | 0.257375  | -0.475124 | -0.821012 |
| H | -0.016057 | -2.121761 | -1.368163 |
| C | 1.268753  | -1.970680 | 0.373942  |
| H | 1.360167  | -1.336005 | 1.264525  |
| H | 1.066006  | -2.983575 | 0.740881  |
| C | 2.590227  | -1.940728 | -0.403326 |
| H | 2.730158  | -0.934543 | -0.813020 |
| H | 2.535500  | -2.618722 | -1.263122 |
| C | 3.841937  | -2.292524 | 0.437451  |
| H | 3.860001  | -1.647724 | 1.319767  |
| C | 3.866137  | -3.771787 | 0.878187  |
| H | 3.975038  | -4.401888 | -0.009879 |
| C | 4.937910  | -4.074353 | 1.824250  |
| H | 2.907479  | -4.030045 | 1.335948  |
| C | 5.818806  | -4.301774 | 2.610585  |
| H | 6.599942  | -4.512958 | 3.302140  |
| O | 5.485607  | -0.708401 | -0.197891 |
| C | 6.623813  | -0.273383 | -0.997491 |
| C | 6.921656  | 1.155053  | -0.642856 |
| H | 7.463764  | -0.934694 | -0.778365 |
| H | 6.369756  | -0.388613 | -2.052188 |
| C | 6.432706  | 2.201005  | -1.429948 |
| C | 7.680078  | 1.459520  | 0.492267  |
| C | 6.697727  | 3.526996  | -1.092983 |
| H | 5.842842  | 1.976041  | -2.313755 |
| C | 7.944880  | 2.782983  | 0.833450  |
| H | 8.064080  | 0.653938  | 1.111145  |
| H | 6.315649  | 4.329841  | -1.715205 |
| C | 7.454235  | 3.819890  | 0.040026  |
| H | 8.536712  | 3.006139  | 1.715262  |
| H | 7.663708  | 4.851791  | 0.302838  |
| H | -2.434348 | -0.151409 | -0.466774 |

80 atoms

addition of another  $\epsilon$ -CL unit to the 3-isomer chain end,  
structure TS12, in toluene

|   |           |           |           |
|---|-----------|-----------|-----------|
| O | -3.863895 | 1.693783  | 0.951006  |
| O | -4.448050 | 1.385045  | -1.165586 |
| C | -3.525997 | 1.862200  | -0.237699 |
| C | -2.770385 | 3.135592  | -0.628035 |
| H | -2.021384 | 2.924450  | -1.391527 |
| H | -2.235210 | 3.444232  | 0.271574  |
| C | -3.698732 | 4.266931  | -1.112669 |
| H | -4.615609 | 4.280426  | -0.512445 |
| H | -3.203008 | 5.226956  | -0.931586 |
| C | -4.033654 | 4.176809  | -2.609130 |
| H | -3.092227 | 4.212194  | -3.173577 |
| H | -4.598471 | 5.067026  | -2.909621 |
| C | -4.819185 | 2.928221  | -3.031255 |
| H | -5.844719 | 2.982326  | -2.646967 |
| H | -4.899029 | 2.908031  | -4.125585 |
| C | -4.224187 | 1.600223  | -2.563515 |
| H | -3.158702 | 1.513677  | -2.788966 |
| H | -4.734917 | 0.772719  | -3.062778 |
| N | -5.145783 | -3.075505 | 0.658440  |
| C | -4.540485 | -1.867759 | 0.507222  |
| N | -4.883366 | -0.842052 | 1.294412  |
| C | -5.864969 | -0.959199 | 2.361632  |
| C | -6.937199 | -1.962493 | 1.957145  |
| C | -6.270856 | -3.278633 | 1.578254  |
| C | -3.316456 | -4.093821 | -0.669178 |
| C | -3.235423 | -2.738384 | -1.359801 |
| N | -3.596832 | -1.691250 | -0.418093 |
| C | -4.709597 | -4.268075 | -0.077656 |
| H | -6.288125 | 0.032510  | 2.526435  |
| H | -5.385578 | -1.269626 | 3.299318  |
| H | -7.500747 | -1.568668 | 1.106300  |
| H | -7.641869 | -2.132527 | 2.774540  |
| H | -5.913564 | -3.801379 | 2.474985  |
| H | -6.987493 | -3.941647 | 1.083898  |
| H | -4.726839 | -5.113182 | 0.617627  |
| H | -5.438644 | -4.486751 | -0.868352 |
| H | -2.563016 | -4.143117 | 0.122490  |
| H | -3.115112 | -4.906179 | -1.371536 |
| H | -3.895510 | -2.719336 | -2.237628 |
| H | -2.224876 | -2.527288 | -1.712391 |
| H | -4.485423 | 0.101364  | 1.108884  |
| O | 5.576302  | 2.522580  | 0.720196  |
| C | 5.092052  | 1.418432  | 0.802759  |
| O | -2.186031 | 0.551836  | -0.612162 |

|   |           |           |           |
|---|-----------|-----------|-----------|
| C | -1.206389 | 0.457635  | 0.379560  |
| H | -1.094021 | -0.595341 | 0.705410  |
| H | -1.520784 | 1.011048  | 1.281334  |
| C | 0.168835  | 0.959857  | -0.082922 |
| H | 0.449130  | 0.415363  | -0.993498 |
| H | 0.084025  | 2.014540  | -0.369882 |
| C | 1.261843  | 0.800264  | 0.979256  |
| H | 1.357232  | -0.259222 | 1.251218  |
| H | 0.948272  | 1.320749  | 1.891633  |
| C | 2.625174  | 1.322090  | 0.510250  |
| H | 2.882692  | 0.825265  | -0.431727 |
| H | 2.560625  | 2.393026  | 0.284907  |
| C | 3.785656  | 1.087793  | 1.508689  |
| H | 3.807753  | 0.027918  | 1.774484  |
| C | 3.646441  | 1.938274  | 2.789843  |
| H | 3.749436  | 2.994738  | 2.523723  |
| C | 4.627066  | 1.597738  | 3.818420  |
| H | 2.641902  | 1.811181  | 3.201998  |
| C | 5.435839  | 1.297016  | 4.656102  |
| H | 6.152014  | 1.042145  | 5.401133  |
| O | 5.625155  | 0.325540  | 0.222523  |
| C | 6.846146  | 0.541251  | -0.542923 |
| C | 7.278545  | -0.780885 | -1.108774 |
| H | 7.595909  | 0.966026  | 0.126585  |
| H | 6.639036  | 1.273024  | -1.325229 |
| C | 6.924264  | -1.148772 | -2.409588 |
| C | 8.027714  | -1.672177 | -0.333908 |
| C | 7.312318  | -2.382114 | -2.929247 |
| H | 6.342684  | -0.464371 | -3.020304 |
| C | 8.415629  | -2.906215 | -0.848909 |
| H | 8.307597  | -1.396283 | 0.678527  |
| H | 7.034111  | -2.653558 | -3.942474 |
| C | 8.058804  | -3.263149 | -2.149082 |
| H | 8.999218  | -3.587701 | -0.238413 |
| H | 8.364259  | -4.223000 | -2.553049 |
| H | -3.093872 | -0.752265 | -0.499629 |

80 atoms

addition of another  $\epsilon$ -CL unit to the 3-isomer chain end,  
structure I2, in toluene

|   |          |           |           |
|---|----------|-----------|-----------|
| O | 3.885954 | -1.634428 | 0.828294  |
| O | 4.237506 | -1.337932 | -1.368278 |
| C | 3.303104 | -1.756820 | -0.401493 |

|   |           |           |           |
|---|-----------|-----------|-----------|
| C | 2.817212  | -3.204313 | -0.580282 |
| H | 2.021000  | -3.225499 | -1.329261 |
| H | 2.363597  | -3.496938 | 0.369320  |
| C | 3.920518  | -4.202126 | -0.968160 |
| H | 4.837748  | -3.964811 | -0.420330 |
| H | 3.616505  | -5.201636 | -0.639519 |
| C | 4.188841  | -4.258365 | -2.480681 |
| H | 3.246459  | -4.502919 | -2.989139 |
| H | 4.869042  | -5.090449 | -2.695004 |
| C | 4.772099  | -2.978132 | -3.092597 |
| H | 5.809964  | -2.847659 | -2.765702 |
| H | 4.799727  | -3.078352 | -4.184982 |
| C | 4.021718  | -1.696140 | -2.737959 |
| H | 2.951319  | -1.768130 | -2.955903 |
| H | 4.416004  | -0.861061 | -3.322377 |
| N | 5.075108  | 3.203183  | 0.828933  |
| C | 4.462121  | 1.982211  | 0.651303  |
| N | 4.729202  | 0.909540  | 1.339192  |
| C | 5.704413  | 1.008584  | 2.413846  |
| C | 6.827083  | 1.985877  | 2.072640  |
| C | 6.218075  | 3.340472  | 1.733792  |
| C | 3.428667  | 4.294030  | -0.679292 |
| C | 3.322985  | 2.922371  | -1.331929 |
| N | 3.464926  | 1.917788  | -0.293931 |
| C | 4.766446  | 4.398146  | 0.042411  |
| H | 6.110759  | 0.010178  | 2.600177  |
| H | 5.217495  | 1.321702  | 3.351130  |
| H | 7.384567  | 1.603854  | 1.211155  |
| H | 7.532870  | 2.095226  | 2.901429  |
| H | 5.901000  | 3.859664  | 2.648847  |
| H | 6.960871  | 3.982631  | 1.246887  |
| H | 4.766746  | 5.261095  | 0.718189  |
| H | 5.572250  | 4.569796  | -0.686925 |
| H | 2.604863  | 4.414927  | 0.030262  |
| H | 3.352856  | 5.092989  | -1.421659 |
| H | 4.085888  | 2.819191  | -2.119808 |
| H | 2.348441  | 2.785659  | -1.805493 |
| H | 4.207030  | -0.687320 | 0.960647  |
| O | -5.655276 | -2.557705 | 0.402845  |
| C | -5.122591 | -1.493922 | 0.614187  |
| O | 2.204789  | -0.815675 | -0.561057 |
| C | 1.197053  | -0.798475 | 0.460177  |
| H | 1.144900  | 0.229521  | 0.835738  |
| H | 1.507673  | -1.425378 | 1.298809  |

|   |           |           |           |
|---|-----------|-----------|-----------|
| C | -0.161596 | -1.223461 | -0.089084 |
| H | -0.395662 | -0.605814 | -0.963896 |
| H | -0.104164 | -2.257917 | -0.445222 |
| C | -1.277455 | -1.094259 | 0.954248  |
| H | -1.329816 | -0.056905 | 1.307800  |
| H | -1.020234 | -1.701991 | 1.829084  |
| C | -2.646279 | -1.507002 | 0.400657  |
| H | -2.850322 | -0.915082 | -0.498319 |
| H | -2.623256 | -2.555117 | 0.080521  |
| C | -3.823650 | -1.307180 | 1.385517  |
| H | -3.799027 | -0.279125 | 1.755248  |
| C | -3.772760 | -2.286547 | 2.578338  |
| H | -3.926427 | -3.303566 | 2.204712  |
| C | -4.765720 | -1.990980 | 3.608840  |
| H | -2.776962 | -2.260521 | 3.029010  |
| C | -5.583110 | -1.725506 | 4.449867  |
| H | -6.307319 | -1.502089 | 5.197314  |
| O | -5.583576 | -0.320661 | 0.141804  |
| C | -6.796608 | -0.388239 | -0.663753 |
| C | -7.152700 | 1.008518  | -1.084815 |
| H | -7.578929 | -0.847117 | -0.056790 |
| H | -6.608998 | -1.038030 | -1.519693 |
| C | -6.845252 | 1.466418  | -2.368392 |
| C | -7.785784 | 1.877275  | -0.189465 |
| C | -7.166259 | 2.766821  | -2.754207 |
| H | -6.353625 | 0.800622  | -3.071720 |
| C | -8.104511 | 3.177638  | -0.569985 |
| H | -8.028315 | 1.531285  | 0.810970  |
| H | -6.925885 | 3.108593  | -3.755733 |
| C | -7.795850 | 3.624682  | -1.854936 |
| H | -8.597342 | 3.841376  | 0.133021  |
| H | -8.048069 | 4.636986  | -2.153860 |
| H | 3.143702  | 0.976333  | -0.499939 |

80 atoms

addition of another  $\epsilon$ -CL unit to the 3-isomer chain end,  
structure TS2r, in toluene

|   |          |           |           |
|---|----------|-----------|-----------|
| O | 3.968674 | -1.614043 | 0.857838  |
| O | 4.280191 | -1.261022 | -1.336555 |
| C | 3.387248 | -1.761914 | -0.369677 |
| C | 3.008819 | -3.239702 | -0.567138 |
| H | 2.198233 | -3.308079 | -1.298017 |
| H | 2.603595 | -3.585963 | 0.386021  |

|   |           |           |           |
|---|-----------|-----------|-----------|
| C | 4.175874  | -4.142559 | -0.998843 |
| H | 5.083074  | -3.847296 | -0.462622 |
| H | 3.954631  | -5.168721 | -0.686573 |
| C | 4.418901  | -4.147689 | -2.516620 |
| H | 3.486555  | -4.446542 | -3.014433 |
| H | 5.151233  | -4.925441 | -2.761109 |
| C | 4.900388  | -2.817037 | -3.108713 |
| H | 5.932169  | -2.621083 | -2.795629 |
| H | 4.915427  | -2.890977 | -4.203442 |
| C | 4.067788  | -1.600228 | -2.711659 |
| H | 3.001725  | -1.743353 | -2.914971 |
| H | 4.392003  | -0.725514 | -3.281044 |
| N | 4.860476  | 3.284406  | 0.869176  |
| C | 4.317182  | 2.029587  | 0.701196  |
| N | 4.666719  | 0.972184  | 1.375281  |
| C | 5.663738  | 1.124232  | 2.423278  |
| C | 6.715314  | 2.169717  | 2.058585  |
| C | 6.016395  | 3.486505  | 1.744890  |
| C | 3.109606  | 4.280736  | -0.585503 |
| C | 3.068797  | 2.908447  | -1.243974 |
| N | 3.299388  | 1.909145  | -0.216663 |
| C | 4.458439  | 4.462283  | 0.099329  |
| H | 6.134803  | 0.151310  | 2.591190  |
| H | 5.184970  | 1.401978  | 3.375787  |
| H | 7.271389  | 1.826594  | 1.180016  |
| H | 7.435350  | 2.317693  | 2.868911  |
| H | 5.692724  | 3.980746  | 2.671404  |
| H | 6.705779  | 4.175103  | 1.243109  |
| H | 4.425638  | 5.320343  | 0.780501  |
| H | 5.231582  | 4.685858  | -0.650950 |
| H | 2.300411  | 4.347772  | 0.147595  |
| H | 2.964499  | 5.077231  | -1.320156 |
| H | 3.814478  | 2.855469  | -2.053049 |
| H | 2.091544  | 2.715533  | -1.691744 |
| H | 4.229699  | -0.649803 | 0.997442  |
| O | -5.663660 | -2.606255 | 0.212285  |
| C | -5.115740 | -1.568506 | 0.500259  |
| O | 2.220579  | -0.905178 | -0.509757 |
| C | 1.218917  | -0.983429 | 0.514305  |
| H | 1.188185  | -0.010975 | 1.019093  |
| H | 1.506224  | -1.720304 | 1.267134  |
| C | -0.142237 | -1.307552 | -0.092002 |
| H | -0.351257 | -0.587750 | -0.891795 |
| H | -0.100037 | -2.294642 | -0.566389 |

|   |           |           |           |
|---|-----------|-----------|-----------|
| C | -1.270058 | -1.273394 | 0.945689  |
| H | -1.311273 | -0.279192 | 1.407898  |
| H | -1.035082 | -1.976006 | 1.753109  |
| C | -2.636613 | -1.602110 | 0.333067  |
| H | -2.808139 | -0.930849 | -0.515534 |
| H | -2.631314 | -2.619461 | -0.075082 |
| C | -3.830107 | -1.455620 | 1.307663  |
| H | -3.798858 | -0.456263 | 1.748842  |
| C | -3.816424 | -2.515891 | 2.430031  |
| H | -3.975141 | -3.502373 | 1.983802  |
| C | -4.826938 | -2.278273 | 3.458466  |
| H | -2.830146 | -2.534712 | 2.901437  |
| C | -5.658128 | -2.059724 | 4.299464  |
| H | -6.394875 | -1.878041 | 5.045970  |
| O | -5.544321 | -0.359228 | 0.092819  |
| C | -6.740246 | -0.352075 | -0.740720 |
| C | -7.055926 | 1.074695  | -1.086532 |
| H | -7.545995 | -0.826837 | -0.178273 |
| H | -6.547598 | -0.955664 | -1.628776 |
| C | -6.691817 | 1.605160  | -2.326711 |
| C | -7.706361 | 1.898926  | -0.162111 |
| C | -6.974045 | 2.933369  | -2.641361 |
| H | -6.186209 | 0.974453  | -3.052116 |
| C | -7.986787 | 3.226759  | -0.471504 |
| H | -7.992860 | 1.496395  | 0.805002  |
| H | -6.689808 | 3.331762  | -3.609941 |
| C | -7.621462 | 3.746440  | -1.713480 |
| H | -8.493734 | 3.855476  | 0.253308  |
| H | -7.843739 | 4.780356  | -1.957100 |
| H | 3.035258  | 0.950521  | -0.424474 |

80 atoms

addition of another  $\epsilon$ -CL unit to the 3-isomer chain end,  
structure I2r, in toluene

|   |          |           |           |
|---|----------|-----------|-----------|
| O | 3.896686 | -1.323748 | 1.280443  |
| O | 4.679606 | -1.575764 | -0.806816 |
| C | 3.770918 | -2.076812 | 0.146035  |
| C | 3.985197 | -3.556913 | 0.507297  |
| H | 3.455409 | -4.185571 | -0.215314 |
| H | 3.501184 | -3.711512 | 1.473602  |
| C | 5.458784 | -3.987244 | 0.585669  |
| H | 6.045736 | -3.198018 | 1.066020  |
| H | 5.526922 | -4.862060 | 1.241119  |



|   |           |           |           |
|---|-----------|-----------|-----------|
| C | 6.066633  | -4.363405 | -0.775152 |
| H | 5.444394  | -5.148019 | -1.226413 |
| H | 7.051277  | -4.817235 | -0.615465 |
| C | 6.216028  | -3.205539 | -1.769839 |
| H | 7.009803  | -2.527401 | -1.436296 |
| H | 6.532553  | -3.600797 | -2.743353 |
| C | 4.955284  | -2.367824 | -1.968091 |
| H | 4.087435  | -2.981046 | -2.230627 |
| H | 5.106038  | -1.653471 | -2.781510 |
| N | 3.337747  | 3.250497  | -0.578296 |
| C | 3.199066  | 1.913565  | -0.277575 |
| N | 3.587890  | 1.355313  | 0.831680  |
| C | 4.165128  | 2.204381  | 1.862121  |
| C | 4.980095  | 3.348916  | 1.263674  |
| C | 4.097132  | 4.137965  | 0.305125  |
| C | 1.925012  | 2.984049  | -2.606288 |
| C | 2.419255  | 1.543830  | -2.593384 |
| N | 2.555894  | 1.128794  | -1.208614 |
| C | 2.913509  | 3.855742  | -1.841637 |
| H | 4.794893  | 1.582266  | 2.504730  |
| H | 3.375614  | 2.615530  | 2.510913  |
| H | 5.836305  | 2.933591  | 0.722082  |
| H | 5.370490  | 4.014760  | 2.039039  |
| H | 3.403022  | 4.782006  | 0.862504  |
| H | 4.707823  | 4.798152  | -0.321120 |
| H | 2.466451  | 4.831563  | -1.619783 |
| H | 3.799418  | 4.050276  | -2.464515 |
| H | 0.938961  | 3.026084  | -2.134443 |
| H | 1.824835  | 3.359202  | -3.628254 |
| H | 3.367289  | 1.464436  | -3.148419 |
| H | 1.703118  | 0.877184  | -3.078407 |
| H | 3.791543  | -0.346662 | 1.059752  |
| O | -5.458886 | -1.232044 | -1.323931 |
| C | -4.855781 | -0.867408 | -0.342121 |
| O | 2.477151  | -1.874107 | -0.481781 |
| C | 1.330055  | -2.176466 | 0.317092  |
| H | 1.426405  | -1.690693 | 1.292997  |
| H | 1.261500  | -3.259647 | 0.482756  |
| C | 0.092092  | -1.679833 | -0.416509 |
| H | 0.187062  | -0.600171 | -0.573770 |
| H | 0.060592  | -2.142278 | -1.409964 |
| C | -1.203593 | -1.985682 | 0.343147  |
| H | -1.157608 | -1.536031 | 1.342550  |
| H | -1.282508 | -3.067813 | 0.496784  |

|   |           |           |           |
|---|-----------|-----------|-----------|
| C | -2.442879 | -1.458372 | -0.389433 |
| H | -2.315619 | -0.382876 | -0.555007 |
| H | -2.517413 | -1.915992 | -1.382686 |
| C | -3.776738 | -1.675422 | 0.364915  |
| H | -3.674519 | -1.283442 | 1.379688  |
| C | -4.187945 | -3.163126 | 0.424175  |
| H | -4.403842 | -3.508047 | -0.591778 |
| C | -5.348261 | -3.406930 | 1.278252  |
| H | -3.347485 | -3.758953 | 0.790308  |
| C | -6.299083 | -3.587979 | 1.991743  |
| H | -7.143192 | -3.756600 | 2.617952  |
| O | -5.021436 | 0.338374  | 0.231864  |
| C | -5.990709 | 1.222341  | -0.405190 |
| C | -6.030604 | 2.504652  | 0.374728  |
| H | -6.957294 | 0.716413  | -0.413598 |
| H | -5.682985 | 1.380850  | -1.439963 |
| C | -5.203965 | 3.576021  | 0.024447  |
| C | -6.880801 | 2.638061  | 1.476689  |
| C | -5.226623 | 4.759423  | 0.759044  |
| H | -4.540028 | 3.483068  | -0.830123 |
| C | -6.905944 | 3.819310  | 2.213820  |
| H | -7.526148 | 1.811116  | 1.757962  |
| H | -4.582463 | 5.585177  | 0.474642  |
| C | -6.078312 | 4.882731  | 1.855615  |
| H | -7.572412 | 3.911385  | 3.065256  |
| H | -6.099330 | 5.804962  | 2.427252  |
| H | 2.617783  | 0.132912  | -1.022375 |

80 atoms

addition of another  $\epsilon$ -CL unit to the 3-isomer chain end,  
structure TS23, in toluene

|   |           |           |           |
|---|-----------|-----------|-----------|
| O | -3.874684 | -0.695517 | -1.620780 |
| O | -4.845281 | -0.621509 | 0.403487  |
| C | -4.024791 | -1.395890 | -0.454907 |
| C | -4.592495 | -2.785891 | -0.787036 |
| H | -4.316340 | -3.485367 | 0.008165  |
| H | -4.074626 | -3.116596 | -1.689718 |
| C | -6.112002 | -2.824463 | -1.012747 |
| H | -6.419919 | -1.939101 | -1.577845 |
| H | -6.345511 | -3.687857 | -1.644906 |
| C | -6.926239 | -2.950277 | 0.284634  |
| H | -6.584127 | -3.844861 | 0.822261  |
| H | -7.976790 | -3.135267 | 0.033435  |

|   |           |           |           |
|---|-----------|-----------|-----------|
| C | -6.853057 | -1.740736 | 1.224800  |
| H | -7.395702 | -0.894495 | 0.788195  |
| H | -7.359622 | -1.982641 | 2.167657  |
| C | -5.439022 | -1.260230 | 1.541199  |
| H | -4.797471 | -2.068326 | 1.906188  |
| H | -5.473122 | -0.495253 | 2.321295  |
| N | -2.408140 | 3.814724  | -0.056284 |
| C | -2.715051 | 2.476676  | -0.163170 |
| N | -2.917793 | 1.845173  | -1.282828 |
| C | -2.752006 | 2.582407  | -2.525856 |
| C | -3.195243 | 4.037247  | -2.386567 |
| C | -2.430324 | 4.680969  | -1.236798 |
| C | -1.929389 | 3.552837  | 2.368563  |
| C | -2.913849 | 2.393283  | 2.300307  |
| N | -2.761335 | 1.752178  | 1.006645  |
| C | -2.205658 | 4.510127  | 1.215636  |
| H | -3.333311 | 2.078571  | -3.303554 |
| H | -1.702130 | 2.549227  | -2.857529 |
| H | -4.270009 | 4.066261  | -2.178942 |
| H | -3.021224 | 4.601632  | -3.307489 |
| H | -1.400333 | 4.912295  | -1.541408 |
| H | -2.897100 | 5.630525  | -0.951501 |
| H | -1.369285 | 5.207838  | 1.093818  |
| H | -3.093650 | 5.119855  | 1.440106  |
| H | -0.911395 | 3.158899  | 2.298011  |
| H | -2.016864 | 4.090476  | 3.316394  |
| H | -3.939746 | 2.757821  | 2.468344  |
| H | -2.701270 | 1.651993  | 3.073531  |
| H | -3.549804 | 0.237456  | -1.428577 |
| O | 5.037999  | -2.549910 | 1.756747  |
| C | 4.574455  | -1.995084 | 0.788483  |
| O | -2.790360 | -1.498204 | 0.279926  |
| C | -1.669622 | -2.036808 | -0.420119 |
| H | -1.576334 | -1.547273 | -1.394150 |
| H | -1.809650 | -3.112921 | -0.594284 |
| C | -0.426344 | -1.798432 | 0.424857  |
| H | -0.331516 | -0.722484 | 0.605588  |
| H | -0.566895 | -2.270169 | 1.404404  |
| C | 0.846229  | -2.336227 | -0.238363 |
| H | 0.980180  | -1.855779 | -1.215376 |
| H | 0.721930  | -3.406613 | -0.437787 |
| C | 2.095936  | -2.095783 | 0.616656  |
| H | 2.161362  | -1.026101 | 0.843683  |
| H | 1.998154  | -2.609961 | 1.579833  |

|   |           |           |           |
|---|-----------|-----------|-----------|
| C | 3.423129  | -2.527120 | -0.053076 |
| H | 3.484584  | -2.059077 | -1.038652 |
| C | 3.543781  | -4.059615 | -0.200221 |
| H | 3.611961  | -4.503516 | 0.797688  |
| C | 4.696551  | -4.472868 | -0.997406 |
| H | 2.634908  | -4.453989 | -0.662485 |
| C | 5.644001  | -4.792873 | -1.665167 |
| H | 6.483817  | -5.085833 | -2.249937 |
| O | 4.984586  | -0.789978 | 0.350498  |
| C | 6.051085  | -0.159636 | 1.117586  |
| C | 6.398661  | 1.140472  | 0.450789  |
| H | 6.898490  | -0.846952 | 1.144409  |
| H | 5.703469  | -0.013202 | 2.141335  |
| C | 5.969022  | 2.355914  | 0.988401  |
| C | 7.152778  | 1.150045  | -0.727785 |
| C | 6.288830  | 3.561060  | 0.364688  |
| H | 5.382103  | 2.360509  | 1.902238  |
| C | 7.469832  | 2.350811  | -1.355670 |
| H | 7.490482  | 0.210252  | -1.154444 |
| H | 5.952305  | 4.498586  | 0.795389  |
| C | 7.039111  | 3.560093  | -0.808944 |
| H | 8.056427  | 2.345191  | -2.268657 |
| H | 7.290052  | 4.497030  | -1.295676 |
| H | -3.153528 | 0.825603  | 0.892606  |

80 atoms

addition of another  $\epsilon$ -CL unit to the 3-isomer chain end,  
structure I3, in toluene

|   |          |           |           |
|---|----------|-----------|-----------|
| O | 3.766563 | -0.780881 | 1.620008  |
| O | 4.776659 | -0.763746 | -0.389480 |
| C | 3.918081 | -1.506798 | 0.470686  |
| C | 4.468595 | -2.896173 | 0.838119  |
| H | 4.187199 | -3.610287 | 0.057865  |
| H | 3.941197 | -3.199390 | 1.744909  |
| C | 5.986274 | -2.951615 | 1.072214  |
| H | 6.305674 | -2.056396 | 1.614895  |
| H | 6.203908 | -3.801423 | 1.727999  |
| C | 6.803856 | -3.125302 | -0.217807 |
| H | 6.447459 | -4.026843 | -0.733983 |
| H | 7.849743 | -3.323111 | 0.042817  |
| C | 6.757918 | -1.939219 | -1.189212 |
| H | 7.320078 | -1.094777 | -0.774210 |
| H | 7.258508 | -2.216507 | -2.125434 |

|   |           |           |           |
|---|-----------|-----------|-----------|
| C | 5.355148  | -1.435591 | -1.517739 |
| H | 4.693770  | -2.234611 | -1.864843 |
| H | 5.404652  | -0.688532 | -2.314438 |
| N | 2.615853  | 3.837010  | 0.145390  |
| C | 2.968103  | 2.507122  | 0.209671  |
| N | 2.814969  | 1.746922  | 1.256332  |
| C | 2.169676  | 2.316703  | 2.428391  |
| C | 2.530692  | 3.789107  | 2.613523  |
| C | 2.170807  | 4.550877  | 1.343928  |
| C | 2.998426  | 3.856031  | -2.308406 |
| C | 3.991871  | 2.735499  | -2.031183 |
| N | 3.479652  | 1.939657  | -0.931580 |
| C | 2.804868  | 4.675613  | -1.038712 |
| H | 2.473048  | 1.735156  | 3.303859  |
| H | 1.074981  | 2.215235  | 2.356890  |
| H | 3.605670  | 3.873120  | 2.804557  |
| H | 2.007746  | 4.228645  | 3.468102  |
| H | 1.086077  | 4.717473  | 1.289776  |
| H | 2.643240  | 5.539842  | 1.344959  |
| H | 1.929410  | 5.327436  | -1.138241 |
| H | 3.671874  | 5.335043  | -0.882795 |
| H | 2.047320  | 3.417833  | -2.624543 |
| H | 3.352122  | 4.507640  | -3.111794 |
| H | 4.986207  | 3.157731  | -1.814691 |
| H | 4.098896  | 2.084299  | -2.901559 |
| H | 3.443010  | 0.151403  | 1.414144  |
| O | -5.116366 | -2.472405 | -1.844457 |
| C | -4.661064 | -1.927244 | -0.866765 |
| O | 2.702563  | -1.608182 | -0.281163 |
| C | 1.568120  | -2.133278 | 0.404532  |
| H | 1.476485  | -1.654136 | 1.384090  |
| H | 1.683682  | -3.214502 | 0.566771  |
| C | 0.337080  | -1.857384 | -0.446803 |
| H | 0.273954  | -0.777975 | -0.620515 |
| H | 0.472852  | -2.324884 | -1.428993 |
| C | -0.954622 | -2.365581 | 0.202379  |
| H | -1.086487 | -1.884557 | 1.179482  |
| H | -0.858808 | -3.439235 | 0.399991  |
| C | -2.189258 | -2.092593 | -0.664652 |
| H | -2.221485 | -1.022382 | -0.896655 |
| H | -2.097671 | -2.613093 | -1.624946 |
| C | -3.534772 | -2.481665 | -0.006064 |
| H | -3.595243 | -2.002769 | 0.974301  |
| C | -3.699249 | -4.008847 | 0.154610  |

|   |           |           |           |
|---|-----------|-----------|-----------|
| H | -3.763991 | -4.461672 | -0.839538 |
| C | -4.875327 | -4.381230 | 0.937825  |
| H | -2.808810 | -4.422734 | 0.635366  |
| C | -5.842009 | -4.665753 | 1.593990  |
| H | -6.698834 | -4.927787 | 2.168663  |
| O | -5.058050 | -0.716132 | -0.433631 |
| C | -6.096620 | -0.063947 | -1.221646 |
| C | -6.432925 | 1.239950  | -0.557084 |
| H | -6.956128 | -0.734424 | -1.269629 |
| H | -5.722195 | 0.078658  | -2.236535 |
| C | -5.869281 | 2.436384  | -1.007739 |
| C | -7.304426 | 1.271857  | 0.536587  |
| C | -6.171746 | 3.643969  | -0.381154 |
| H | -5.190967 | 2.423257  | -1.855884 |
| C | -7.606789 | 2.475756  | 1.166689  |
| H | -7.746961 | 0.347237  | 0.895250  |
| H | -5.730539 | 4.566739  | -0.743847 |
| C | -7.040926 | 3.665211  | 0.707731  |
| H | -8.286281 | 2.487598  | 2.012740  |
| H | -7.279467 | 4.604780  | 1.195653  |
| H | 3.857825  | 1.007386  | -0.796667 |

80 atoms

addition of another  $\epsilon$ -CL unit to the 3-isomer chain end,  
structure TS3r, in toluene

|   |          |           |           |
|---|----------|-----------|-----------|
| O | 4.031993 | -1.372885 | 0.978038  |
| O | 4.410928 | -0.736863 | -1.144819 |
| C | 3.834858 | -1.755766 | -0.317241 |
| C | 4.466998 | -3.138502 | -0.533776 |
| H | 3.972066 | -3.620482 | -1.381147 |
| H | 4.197366 | -3.720160 | 0.351439  |
| C | 5.988659 | -3.141228 | -0.738875 |
| H | 6.451202 | -2.405369 | -0.073277 |
| H | 6.380633 | -4.117725 | -0.434596 |
| C | 6.407326 | -2.894338 | -2.197306 |
| H | 5.921164 | -3.650623 | -2.827963 |
| H | 7.484744 | -3.067656 | -2.298594 |
| C | 6.083984 | -1.499392 | -2.748146 |
| H | 6.741176 | -0.754205 | -2.285284 |
| H | 6.297181 | -1.476329 | -3.824347 |
| C | 4.645638 | -1.036230 | -2.527379 |
| H | 3.911925 | -1.761251 | -2.891355 |
| H | 4.469291 | -0.102400 | -3.068437 |

|   |           |           |           |
|---|-----------|-----------|-----------|
| N | 3.173208  | 3.525034  | 1.291713  |
| C | 3.327473  | 2.232049  | 0.848282  |
| N | 3.327139  | 1.177043  | 1.614387  |
| C | 3.089218  | 1.362966  | 3.037544  |
| C | 3.698377  | 2.667200  | 3.547269  |
| C | 3.147906  | 3.825793  | 2.724950  |
| C | 2.930008  | 4.331666  | -1.044489 |
| C | 3.784210  | 3.125658  | -1.412016 |
| N | 3.448188  | 2.041931  | -0.506669 |
| C | 3.182292  | 4.695776  | 0.413278  |
| H | 3.513323  | 0.507134  | 3.570505  |
| H | 2.009225  | 1.355260  | 3.254474  |
| H | 4.787127  | 2.620771  | 3.440194  |
| H | 3.477002  | 2.828633  | 4.606378  |
| H | 2.119706  | 4.061706  | 3.031792  |
| H | 3.743916  | 4.730107  | 2.891703  |
| H | 2.415437  | 5.393676  | 0.767814  |
| H | 4.148176  | 5.213744  | 0.508820  |
| H | 1.876056  | 4.080192  | -1.194548 |
| H | 3.164493  | 5.189799  | -1.679744 |
| H | 4.852308  | 3.391525  | -1.367550 |
| H | 3.574757  | 2.794695  | -2.431667 |
| H | 3.782518  | -0.407307 | 1.125576  |
| O | -5.477989 | -2.932020 | -0.281620 |
| C | -4.891743 | -1.947337 | 0.101635  |
| O | 2.452435  | -1.839687 | -0.695894 |
| C | 1.461426  | -1.748166 | 0.326833  |
| H | 1.495620  | -0.764562 | 0.807057  |
| H | 1.641526  | -2.501792 | 1.102725  |
| C | 0.107524  | -1.972591 | -0.331724 |
| H | -0.025270 | -1.227368 | -1.124128 |
| H | 0.110987  | -2.952504 | -0.822515 |
| C | -1.052303 | -1.889158 | 0.666474  |
| H | -1.049989 | -0.904563 | 1.150308  |
| H | -0.890212 | -2.622584 | 1.464356  |
| C | -2.413650 | -2.119043 | -0.000107 |
| H | -2.525315 | -1.400573 | -0.819601 |
| H | -2.446107 | -3.114703 | -0.457357 |
| C | -3.626856 | -1.960334 | 0.948062  |
| H | -3.551899 | -0.993982 | 1.452724  |
| C | -3.709067 | -3.087792 | 2.000301  |
| H | -3.913876 | -4.032465 | 1.487299  |
| C | -4.732617 | -2.853800 | 3.016582  |
| H | -2.739486 | -3.197488 | 2.493433  |

|   |           |           |           |
|---|-----------|-----------|-----------|
| C | -5.573515 | -2.638352 | 3.848751  |
| H | -6.319563 | -2.459326 | 4.586589  |
| O | -5.253838 | -0.690841 | -0.218601 |
| C | -6.422720 | -0.563499 | -1.080265 |
| C | -6.668041 | 0.899041  | -1.315853 |
| H | -7.264535 | -1.046617 | -0.581506 |
| H | -6.227476 | -1.100464 | -2.009657 |
| C | -6.199954 | 1.521804  | -2.475832 |
| C | -7.354693 | 1.663589  | -0.366951 |
| C | -6.415140 | 2.882349  | -2.687444 |
| H | -5.665728 | 0.937519  | -3.219378 |
| C | -7.569422 | 3.023464  | -0.573680 |
| H | -7.721953 | 1.189172  | 0.538298  |
| H | -6.050176 | 3.352835  | -3.594702 |
| C | -7.100178 | 3.635429  | -1.735937 |
| H | -8.105975 | 3.605264  | 0.168809  |
| H | -7.271050 | 4.694507  | -1.900034 |
| H | 3.725725  | 1.098737  | -0.763390 |

80 atoms

addition of another  $\epsilon$ -CL unit to the 3-isomer chain end,  
structure I3r, in toluene

|   |          |           |           |
|---|----------|-----------|-----------|
| O | 4.145795 | -0.734632 | 1.724873  |
| O | 3.606156 | -1.859716 | -0.145857 |
| C | 3.492878 | -1.858587 | 1.291332  |
| C | 4.118916 | -3.091261 | 1.957223  |
| H | 3.368320 | -3.884554 | 2.009296  |
| H | 4.321332 | -2.788115 | 2.986568  |
| C | 5.396958 | -3.612760 | 1.287074  |
| H | 6.020847 | -2.767964 | 0.977460  |
| H | 5.978270 | -4.162997 | 2.034595  |
| C | 5.132781 | -4.557143 | 0.102625  |
| H | 4.489028 | -5.375576 | 0.451360  |
| H | 6.075234 | -5.026485 | -0.201706 |
| C | 4.492659 | -3.906251 | -1.130477 |
| H | 5.222399 | -3.258242 | -1.629970 |
| H | 4.223359 | -4.685699 | -1.854414 |
| C | 3.253643 | -3.063480 | -0.838553 |
| H | 2.498892 | -3.615525 | -0.270597 |
| H | 2.784799 | -2.746923 | -1.774949 |
| N | 4.105880 | 2.969883  | -1.614039 |
| C | 3.920354 | 1.768321  | -0.970291 |
| N | 3.958093 | 1.598006  | 0.319829  |



|   |           |           |           |
|---|-----------|-----------|-----------|
| C | 4.154367  | 2.768811  | 1.160687  |
| C | 5.078302  | 3.791424  | 0.502482  |
| C | 4.517777  | 4.159864  | -0.865809 |
| C | 3.394501  | 1.964873  | -3.771945 |
| C | 3.901372  | 0.656613  | -3.179398 |
| N | 3.629829  | 0.674520  | -1.753197 |
| C | 4.079441  | 3.130311  | -3.068684 |
| H | 4.568369  | 2.437839  | 2.117411  |
| H | 3.188284  | 3.244750  | 1.392309  |
| H | 6.075303  | 3.353147  | 0.388729  |
| H | 5.181718  | 4.692877  | 1.113582  |
| H | 3.662380  | 4.841200  | -0.761151 |
| H | 5.272955  | 4.687985  | -1.458655 |
| H | 3.562143  | 4.068484  | -3.298991 |
| H | 5.109304  | 3.239200  | -3.440145 |
| H | 2.311158  | 2.022512  | -3.631787 |
| H | 3.597678  | 2.017330  | -4.844742 |
| H | 4.973470  | 0.532309  | -3.399860 |
| H | 3.379642  | -0.198249 | -3.615453 |
| H | 4.015798  | 0.059789  | 1.123589  |
| O | -5.492799 | 0.436225  | 2.734331  |
| C | -4.869822 | 0.515738  | 1.702093  |
| O | 2.120128  | -1.898366 | 1.647649  |
| C | 1.356273  | -0.724062 | 1.368932  |
| H | 1.446145  | -0.457096 | 0.309861  |
| H | 1.741895  | 0.114776  | 1.957413  |
| C | -0.092373 | -1.015884 | 1.730130  |
| H | -0.443240 | -1.866604 | 1.134770  |
| H | -0.135302 | -1.331335 | 2.778771  |
| C | -1.008693 | 0.191898  | 1.507148  |
| H | -0.953247 | 0.506604  | 0.457561  |
| H | -0.636709 | 1.035502  | 2.099061  |
| C | -2.468640 | -0.109831 | 1.864676  |
| H | -2.794618 | -0.982191 | 1.287771  |
| H | -2.547728 | -0.392353 | 2.920795  |
| C | -3.450708 | 1.051937  | 1.578219  |
| H | -3.307772 | 1.382914  | 0.546565  |
| C | -3.252173 | 2.246020  | 2.536946  |
| H | -3.533310 | 1.934683  | 3.547627  |
| C | -4.027506 | 3.424922  | 2.156989  |
| H | -2.192806 | 2.514398  | 2.570391  |
| C | -4.665456 | 4.387314  | 1.821014  |
| H | -5.232294 | 5.241991  | 1.535953  |
| O | -5.333887 | 0.083804  | 0.514334  |

|   |           |           |           |
|---|-----------|-----------|-----------|
| C | -6.664475 | -0.511987 | 0.526445  |
| C | -7.002264 | -0.918356 | -0.879007 |
| H | -7.363244 | 0.227950  | 0.919874  |
| H | -6.655115 | -1.363852 | 1.208063  |
| C | -6.776290 | -2.226525 | -1.315629 |
| C | -7.530167 | 0.013692  | -1.778228 |
| C | -7.073682 | -2.599118 | -2.624990 |
| H | -6.367072 | -2.958588 | -0.625508 |
| C | -7.826952 | -0.354384 | -3.087804 |
| H | -7.708907 | 1.033039  | -1.448912 |
| H | -6.897394 | -3.619298 | -2.950267 |
| C | -7.599490 | -1.662913 | -3.513392 |
| H | -8.239083 | 0.377349  | -3.775107 |
| H | -7.834352 | -1.951980 | -4.532719 |
| H | 3.664508  | -0.203543 | -1.244064 |

80 atoms

addition of another  $\epsilon$ -CL unit to the 3-isomer chain end,  
structure TS3r2, in toluene

|   |          |           |           |
|---|----------|-----------|-----------|
| O | 3.453585 | 0.699855  | -1.839154 |
| O | 3.215031 | 1.722764  | 0.150846  |
| C | 2.900060 | 1.811977  | -1.248583 |
| C | 3.413342 | 3.099401  | -1.913472 |
| H | 2.691524 | 3.905489  | -1.752675 |
| H | 3.403549 | 2.884632  | -2.983984 |
| C | 4.812576 | 3.538111  | -1.461849 |
| H | 5.449873 | 2.656905  | -1.329611 |
| H | 5.270298 | 4.126506  | -2.263959 |
| C | 4.804606 | 4.395904  | -0.186215 |
| H | 4.151660 | 5.261952  | -0.357247 |
| H | 5.807335 | 4.804848  | -0.017870 |
| C | 4.352372 | 3.670977  | 1.087821  |
| H | 5.123616 | 2.959816  | 1.405809  |
| H | 4.246143 | 4.398823  | 1.902044  |
| C | 3.043260 | 2.896032  | 0.955556  |
| H | 2.232800 | 3.511658  | 0.553870  |
| H | 2.719298 | 2.538031  | 1.936839  |
| N | 5.854367 | -2.318008 | 1.321187  |
| C | 5.058463 | -1.350126 | 0.752899  |
| N | 5.120603 | -0.964868 | -0.488473 |
| C | 6.059475 | -1.638718 | -1.371842 |
| C | 7.333047 | -2.052451 | -0.637614 |
| C | 6.958386 | -2.911703 | 0.563987  |

|   |           |           |           |
|---|-----------|-----------|-----------|
| C | 4.458249  | -2.310028 | 3.373937  |
| C | 4.142444  | -0.867888 | 3.000525  |
| N | 4.094125  | -0.778116 | 1.552162  |
| C | 5.776720  | -2.716316 | 2.727152  |
| H | 6.295259  | -0.963642 | -2.199358 |
| H | 5.592783  | -2.527292 | -1.825129 |
| H | 7.861230  | -1.154569 | -0.299618 |
| H | 8.011722  | -2.607960 | -1.291500 |
| H | 6.680586  | -3.924570 | 0.241678  |
| H | 7.814331  | -3.017463 | 1.239882  |
| H | 5.905213  | -3.803146 | 2.780710  |
| H | 6.618341  | -2.271866 | 3.279420  |
| H | 3.648998  | -2.954769 | 3.018978  |
| H | 4.532262  | -2.429364 | 4.457990  |
| H | 4.895408  | -0.192777 | 3.438073  |
| H | 3.169082  | -0.566650 | 3.394395  |
| H | 4.034407  | 0.151403  | -1.229065 |
| O | -5.891308 | -1.092381 | -2.562277 |
| C | -5.335942 | -0.985634 | -1.494493 |
| O | 1.498085  | 1.842085  | -1.424043 |
| C | 0.792960  | 0.653246  | -1.060234 |
| H | 0.851548  | 0.501549  | 0.024922  |
| H | 1.258300  | -0.208619 | -1.545944 |
| C | -0.653315 | 0.815808  | -1.502927 |
| H | -1.072603 | 1.713162  | -1.033410 |
| H | -0.669256 | 0.993644  | -2.583947 |
| C | -1.513107 | -0.405071 | -1.158503 |
| H | -1.495394 | -0.573509 | -0.074330 |
| H | -1.065356 | -1.295367 | -1.613792 |
| C | -2.966588 | -0.243528 | -1.618493 |
| H | -3.367225 | 0.680903  | -1.188235 |
| H | -3.005051 | -0.118373 | -2.706693 |
| C | -3.901367 | -1.408174 | -1.211346 |
| H | -3.807264 | -1.571509 | -0.134849 |
| C | -3.579555 | -2.718288 | -1.962750 |
| H | -3.800012 | -2.576853 | -3.025224 |
| C | -4.326270 | -3.869165 | -1.459489 |
| H | -2.509540 | -2.929099 | -1.885742 |
| C | -4.943352 | -4.805360 | -1.024949 |
| H | -5.490006 | -5.638937 | -0.651661 |
| O | -5.901942 | -0.420619 | -0.411421 |
| C | -7.260047 | 0.079100  | -0.587723 |
| C | -7.711314 | 0.664735  | 0.719250  |
| H | -7.888802 | -0.755042 | -0.903507 |

|   |           |           |           |
|---|-----------|-----------|-----------|
| H | -7.254694 | 0.820090  | -1.388403 |
| C | -7.621758 | 2.039563  | 0.952561  |
| C | -8.211167 | -0.162350 | 1.730395  |
| C | -8.025889 | 2.580536  | 2.171634  |
| H | -7.235167 | 2.691141  | 0.174348  |
| C | -8.613569 | 0.374097  | 2.950408  |
| H | -8.284206 | -1.232305 | 1.559190  |
| H | -7.954980 | 3.650487  | 2.338454  |
| C | -8.522233 | 1.748023  | 3.172830  |
| H | -9.002161 | -0.277842 | 3.726071  |
| H | -8.839675 | 2.167722  | 4.121958  |
| H | 3.681630  | 0.049829  | 1.134546  |

80 atoms

addition of another  $\epsilon$ -CL unit to the 3-isomer chain end,  
structure I3r2, in toluene

|   |          |           |           |
|---|----------|-----------|-----------|
| O | 3.197672 | -0.838746 | -1.432382 |
| O | 2.775474 | 1.165658  | -0.512112 |
| C | 2.659383 | 0.391494  | -1.727563 |
| C | 3.320643 | 1.075127  | -2.940801 |
| H | 2.598364 | 1.758713  | -3.397210 |
| H | 3.481353 | 0.273216  | -3.664553 |
| C | 4.633916 | 1.817104  | -2.652753 |
| H | 5.239461 | 1.245727  | -1.941225 |
| H | 5.213773 | 1.862130  | -3.580963 |
| C | 4.429210 | 3.256015  | -2.151460 |
| H | 3.814074 | 3.793705  | -2.885257 |
| H | 5.395292 | 3.773403  | -2.133353 |
| C | 3.781020 | 3.381777  | -0.766897 |
| H | 4.489776 | 3.062679  | 0.006145  |
| H | 3.557048 | 4.436851  | -0.564995 |
| C | 2.500701 | 2.569983  | -0.582617 |
| H | 1.768772 | 2.768891  | -1.371585 |
| H | 2.026661 | 2.828406  | 0.368444  |
| N | 6.754088 | -0.768001 | 1.924444  |
| C | 5.688157 | -0.494471 | 1.099175  |
| N | 5.608277 | -0.839954 | -0.156195 |
| C | 6.690642 | -1.631556 | -0.719060 |
| C | 8.043931 | -1.246176 | -0.125330 |
| C | 7.975906 | -1.373933 | 1.391536  |
| C | 5.437874 | -0.069283 | 3.908215  |
| C | 4.681496 | 0.829441  | 2.938834  |
| N | 4.617282 | 0.160714  | 1.653318  |

|   |           |           |           |
|---|-----------|-----------|-----------|
| C | 6.814825  | -0.376439 | 3.333062  |
| H | 6.693340  | -1.487793 | -1.803470 |
| H | 6.511426  | -2.705575 | -0.553389 |
| H | 8.276328  | -0.211700 | -0.399548 |
| H | 8.848011  | -1.878628 | -0.512901 |
| H | 8.022949  | -2.429841 | 1.691417  |
| H | 8.832993  | -0.873667 | 1.856317  |
| H | 7.284283  | -1.193359 | 3.892229  |
| H | 7.472341  | 0.499007  | 3.442093  |
| H | 4.873858  | -0.995658 | 4.050828  |
| H | 5.548919  | 0.410445  | 4.884157  |
| H | 5.176643  | 1.811507  | 2.873830  |
| H | 3.659955  | 1.004686  | 3.283537  |
| H | 4.096545  | -0.767328 | -0.988467 |
| O | -6.405764 | -2.017155 | -1.695406 |
| C | -5.760707 | -1.520156 | -0.802864 |
| O | 1.308534  | 0.241647  | -2.076735 |
| C | 0.510916  | -0.555681 | -1.193676 |
| H | 0.623510  | -0.194790 | -0.165633 |
| H | 0.855080  | -1.592763 | -1.225222 |
| C | -0.934527 | -0.444577 | -1.654191 |
| H | -1.241019 | 0.607259  | -1.621305 |
| H | -0.992559 | -0.752847 | -2.704285 |
| C | -1.886614 | -1.294491 | -0.805889 |
| H | -1.820540 | -0.983537 | 0.244309  |
| H | -1.555585 | -2.338455 | -0.837000 |
| C | -3.342499 | -1.181378 | -1.272831 |
| H | -3.625957 | -0.123282 | -1.275171 |
| H | -3.433154 | -1.526899 | -2.309170 |
| C | -4.358943 | -1.949754 | -0.393688 |
| H | -4.210786 | -1.654794 | 0.648198  |
| C | -4.216721 | -3.481752 | -0.522363 |
| H | -4.495167 | -3.776450 | -1.538756 |
| C | -5.033630 | -4.218802 | 0.439233  |
| H | -3.169042 | -3.762985 | -0.385771 |
| C | -5.705280 | -4.806511 | 1.245187  |
| H | -6.301538 | -5.335841 | 1.950385  |
| O | -6.179580 | -0.467368 | -0.075210 |
| C | -7.487596 | 0.072301  | -0.425738 |
| C | -7.765275 | 1.238432  | 0.478619  |
| H | -8.224656 | -0.723836 | -0.308074 |
| H | -7.470903 | 0.364502  | -1.476689 |
| C | -7.507253 | 2.544852  | 0.055047  |
| C | -8.269552 | 1.031653  | 1.766734  |

|   |           |          |           |
|---|-----------|----------|-----------|
| C | -7.749993 | 3.626118 | 0.899983  |
| H | -7.116108 | 2.716985 | -0.943476 |
| C | -8.511159 | 2.109180 | 2.614540  |
| H | -8.473056 | 0.020186 | 2.105779  |
| H | -7.549252 | 4.635983 | 0.557147  |
| C | -8.252085 | 3.409555 | 2.181748  |
| H | -8.905030 | 1.935777 | 3.610766  |
| H | -8.444067 | 4.250466 | 2.840361  |
| H | 3.918764  | 0.459468 | 0.980177  |

80 atoms

addition of another  $\epsilon$ -CL unit to the 3-isomer chain end,  
structure TS34, in toluene

|   |           |           |           |
|---|-----------|-----------|-----------|
| O | 3.367407  | -0.200887 | 0.064220  |
| O | 2.823372  | 2.053610  | -0.883373 |
| C | 4.122901  | 0.721234  | -0.292750 |
| C | 4.934907  | 1.532980  | 0.708153  |
| H | 5.591857  | 2.218694  | 0.168544  |
| H | 5.592535  | 0.794244  | 1.182969  |
| C | 4.131505  | 2.280956  | 1.784448  |
| H | 3.171087  | 1.778979  | 1.935457  |
| H | 4.668607  | 2.201545  | 2.736678  |
| C | 3.922031  | 3.778810  | 1.498666  |
| H | 4.899988  | 4.220909  | 1.263294  |
| H | 3.594645  | 4.267890  | 2.425098  |
| C | 2.929960  | 4.139364  | 0.384409  |
| H | 1.908157  | 3.917762  | 0.720384  |
| H | 2.971923  | 5.225652  | 0.218856  |
| C | 3.144724  | 3.406310  | -0.950407 |
| H | 4.189379  | 3.546967  | -1.284138 |
| H | 2.526549  | 3.909706  | -1.718584 |
| N | -1.469147 | 0.357098  | 0.420330  |
| C | -0.147902 | 0.577837  | 0.201974  |
| N | 0.775711  | -0.081991 | 0.918817  |
| C | 0.433222  | -1.149964 | 1.846056  |
| C | -0.891131 | -0.820795 | 2.520414  |
| C | -1.950216 | -0.566507 | 1.454984  |
| C | -1.950026 | 1.479503  | -1.728143 |
| C | -0.656470 | 2.251420  | -1.504867 |
| N | 0.266232  | 1.452179  | -0.712689 |
| C | -2.501484 | 1.021028  | -0.384057 |
| H | 1.241780  | -1.229376 | 2.574185  |
| H | 0.368241  | -2.114562 | 1.324951  |

|   |           |           |            |
|---|-----------|-----------|------------|
| H | -0.770238 | 0.068021  | 3.146664   |
| H | -1.212079 | -1.641646 | 3.165705   |
| H | -2.259260 | -1.508731 | 0.984527   |
| H | -2.843163 | -0.122600 | 1.904454   |
| H | -3.315583 | 0.305672  | -0.530337  |
| H | -2.912857 | 1.869896  | 0.176993   |
| H | -1.753212 | 0.611065  | -2.363889  |
| H | -2.690490 | 2.102130  | -2.235612  |
| H | -0.866696 | 3.207931  | -1.007840  |
| H | -0.165703 | 2.481599  | -2.452288  |
| H | 1.761897  | -0.020798 | 0.609114   |
| O | 7.137273  | -2.199204 | -8.618156  |
| C | 6.094820  | -1.630759 | -8.393629  |
| O | 4.849722  | 0.606931  | -1.457312  |
| C | 4.279402  | -0.234604 | -2.461008  |
| H | 3.291085  | 0.155497  | -2.723717  |
| H | 4.148623  | -1.245611 | -2.063330  |
| C | 5.216595  | -0.228034 | -3.658213  |
| H | 5.335597  | 0.802369  | -4.011167  |
| H | 6.208425  | -0.561512 | -3.331421  |
| C | 4.716433  | -1.118812 | -4.800366  |
| H | 3.727845  | -0.774047 | -5.128773  |
| H | 4.575314  | -2.137561 | -4.421991  |
| C | 5.673383  | -1.122310 | -5.998074  |
| H | 5.834122  | -0.087078 | -6.318185  |
| H | 6.654102  | -1.505961 | -5.693862  |
| C | 5.173396  | -1.930649 | -7.219923  |
| H | 4.171552  | -1.582155 | -7.483049  |
| C | 5.138072  | -3.450944 | -6.951574  |
| H | 6.163508  | -3.807020 | -6.813150  |
| C | 4.499011  | -4.211730 | -8.023142  |
| H | 4.606352  | -3.642787 | -6.015780  |
| C | 3.961372  | -4.819457 | -8.910713  |
| H | 3.493463  | -5.366218 | -9.695001  |
| O | 5.630338  | -0.604451 | -9.130888  |
| C | 6.472257  | -0.187434 | -10.245608 |
| C | 5.784962  | 0.949055  | -10.945944 |
| H | 6.616150  | -1.047582 | -10.901429 |
| H | 7.447070  | 0.103817  | -9.851684  |
| C | 6.117073  | 2.273624  | -10.649391 |
| C | 4.787258  | 0.697134  | -11.893234 |
| C | 5.467496  | 3.328248  | -11.287888 |
| H | 6.890295  | 2.480815  | -9.915382  |
| C | 4.134625  | 1.748163  | -12.531731 |

|   |          |           |            |
|---|----------|-----------|------------|
| H | 4.521419 | -0.328862 | -12.130271 |
| H | 5.737480 | 4.352278  | -11.051022 |
| C | 4.474588 | 3.066780  | -12.230103 |
| H | 3.364093 | 1.539515  | -13.266902 |
| H | 3.969278 | 3.886822  | -12.730062 |
| H | 1.317450 | 1.677784  | -0.776669  |

80 atoms

addition of another  $\epsilon$ -CL unit to the 3-isomer chain end,  
structure I4, in toluene

|   |          |           |           |
|---|----------|-----------|-----------|
| O | 4.213459 | 1.623981  | -0.867730 |
| O | 3.679386 | 0.795118  | 2.171046  |
| C | 3.710497 | 2.441859  | -0.123172 |
| C | 4.461098 | 3.432911  | 0.735615  |
| H | 3.984167 | 3.439404  | 1.717329  |
| H | 4.262950 | 4.418992  | 0.297531  |
| C | 5.972943 | 3.194540  | 0.832173  |
| H | 6.328629 | 2.777326  | -0.114964 |
| H | 6.458160 | 4.171438  | 0.933212  |
| C | 6.470532 | 2.320944  | 1.997569  |
| H | 6.109228 | 2.746321  | 2.943601  |
| H | 7.559984 | 2.439025  | 2.024408  |
| C | 6.155730 | 0.809271  | 1.968103  |
| H | 6.089931 | 0.451121  | 0.935466  |
| H | 7.002451 | 0.277127  | 2.421837  |
| C | 4.906133 | 0.365507  | 2.736864  |
| H | 4.957936 | 0.763893  | 3.758868  |
| H | 4.917112 | -0.730102 | 2.819844  |
| N | 3.019459 | -3.382415 | -0.533025 |
| C | 3.240474 | -2.060061 | -0.221716 |
| N | 4.115833 | -1.366984 | -1.024432 |
| C | 4.514577 | -1.848494 | -2.334941 |
| C | 4.844712 | -3.329722 | -2.215771 |
| C | 3.627173 | -4.068335 | -1.674785 |
| C | 1.065873 | -3.269845 | 0.970879  |
| C | 1.865440 | -2.192433 | 1.699318  |
| N | 2.709653 | -1.431198 | 0.789958  |
| C | 2.029674 | -4.168517 | 0.206391  |
| H | 5.385838 | -1.274129 | -2.655891 |
| H | 3.727987 | -1.697627 | -3.091394 |
| H | 5.693966 | -3.452656 | -1.537324 |
| H | 5.125281 | -3.750381 | -3.184883 |
| H | 2.875881 | -4.187039 | -2.469701 |



|   |           |           |           |
|---|-----------|-----------|-----------|
| H | 3.907357  | -5.078183 | -1.354610 |
| H | 1.485068  | -4.789813 | -0.513405 |
| H | 2.543539  | -4.854789 | 0.893518  |
| H | 0.370366  | -2.793662 | 0.271474  |
| H | 0.472881  | -3.870702 | 1.666609  |
| H | 2.473257  | -2.663051 | 2.488596  |
| H | 1.196147  | -1.494306 | 2.210098  |
| H | 4.105494  | -0.363145 | -0.882818 |
| O | -5.445324 | 2.261646  | -1.796993 |
| C | -4.780832 | 1.358866  | -1.346036 |
| O | 2.387076  | 2.635296  | -0.029941 |
| C | 1.532448  | 1.758555  | -0.801407 |
| H | 1.677601  | 0.735786  | -0.445528 |
| H | 1.833002  | 1.805830  | -1.851615 |
| C | 0.102491  | 2.228730  | -0.601317 |
| H | -0.130425 | 2.207195  | 0.468544  |
| H | 0.021155  | 3.274018  | -0.919790 |
| C | -0.900926 | 1.365108  | -1.374179 |
| H | -0.810931 | 0.320830  | -1.051015 |
| H | -0.641798 | 1.380901  | -2.438772 |
| C | -2.346631 | 1.832739  | -1.169908 |
| H | -2.559072 | 1.845524  | -0.095503 |
| H | -2.461512 | 2.865320  | -1.519149 |
| C | -3.409233 | 0.944828  | -1.861372 |
| H | -3.241533 | -0.094077 | -1.566765 |
| C | -3.367859 | 1.059835  | -3.400683 |
| H | -3.670771 | 2.072273  | -3.684593 |
| C | -4.225819 | 0.087762  | -4.074611 |
| H | -2.340219 | 0.926229  | -3.749473 |
| C | -4.929863 | -0.725910 | -4.611483 |
| H | -5.556908 | -1.437544 | -5.094695 |
| O | -5.143802 | 0.623220  | -0.279493 |
| C | -6.415084 | 0.979533  | 0.340561  |
| C | -6.634930 | 0.060081  | 1.506923  |
| H | -7.198063 | 0.882309  | -0.413066 |
| H | -6.367593 | 2.025783  | 0.646078  |
| C | -6.238814 | 0.436007  | 2.793469  |
| C | -7.221338 | -1.195465 | 1.318896  |
| C | -6.425682 | -0.424335 | 3.873322  |
| H | -5.783013 | 1.409176  | 2.950984  |
| C | -7.408570 | -2.058532 | 2.395448  |
| H | -7.532585 | -1.497215 | 0.323097  |
| H | -6.117030 | -0.118860 | 4.867800  |
| C | -7.011037 | -1.673656 | 3.675527  |

|   |           |           |          |
|---|-----------|-----------|----------|
| H | -7.867749 | -3.028983 | 2.237170 |
| H | -7.160105 | -2.343845 | 4.515969 |
| H | 3.333923  | 0.063750  | 1.602234 |

80 atoms

addition of another  $\epsilon$ -CL unit to the 3-isomer chain end,  
structure I5, in toluene

|   |           |           |           |
|---|-----------|-----------|-----------|
| O | 0.348644  | -0.064222 | -0.450000 |
| O | 7.776561  | -1.940293 | -1.572275 |
| C | 0.316107  | -1.271376 | -0.478435 |
| C | 1.497323  | -2.183957 | -0.731446 |
| H | 1.294750  | -2.730159 | -1.660749 |
| H | 1.508846  | -2.947589 | 0.053725  |
| C | 2.834188  | -1.448778 | -0.811738 |
| H | 2.774130  | -0.672908 | -1.581433 |
| H | 3.014235  | -0.920221 | 0.130512  |
| C | 4.007027  | -2.387821 | -1.110245 |
| H | 3.824851  | -2.904984 | -2.061913 |
| H | 4.049026  | -3.173859 | -0.344610 |
| C | 5.356192  | -1.665508 | -1.172472 |
| H | 5.320932  | -0.873265 | -1.930168 |
| H | 5.558301  | -1.169629 | -0.216257 |
| C | 6.521989  | -2.601557 | -1.498674 |
| H | 6.359771  | -3.070206 | -2.475230 |
| H | 6.560207  | -3.414106 | -0.757162 |
| N | 9.151351  | 1.721803  | 1.034962  |
| C | 8.649002  | 0.684916  | 0.282723  |
| N | 8.226473  | 0.987678  | -0.993884 |
| C | 8.640925  | 2.197953  | -1.679581 |
| C | 8.489427  | 3.362477  | -0.709928 |
| C | 9.322158  | 3.087527  | 0.536307  |
| C | 10.038285 | -0.005071 | 2.559817  |
| C | 8.860159  | -0.846821 | 2.072314  |
| N | 8.507960  | -0.542839 | 0.694949  |
| C | 9.710586  | 1.470276  | 2.364695  |
| H | 8.000409  | 2.330331  | -2.554091 |
| H | 9.679793  | 2.138866  | -2.041019 |
| H | 7.433795  | 3.468147  | -0.443610 |
| H | 8.816621  | 4.300567  | -1.165912 |
| H | 10.386737 | 3.265281  | 0.322596  |
| H | 9.043174  | 3.780382  | 1.338117  |
| H | 10.614704 | 2.079732  | 2.472770  |
| H | 9.002847  | 1.812600  | 3.132190  |

|   |            |           |           |
|---|------------|-----------|-----------|
| H | 10.929676  | -0.265084 | 1.979247  |
| H | 10.262534  | -0.197480 | 3.613228  |
| H | 7.996656   | -0.685162 | 2.737184  |
| H | 9.100169   | -1.912071 | 2.139303  |
| H | 8.009321   | 0.167208  | -1.548236 |
| O | -7.751951  | -1.493239 | -1.423530 |
| C | -7.453513  | -1.036434 | -0.344631 |
| O | -0.813082  | -1.987313 | -0.291894 |
| C | -2.027198  | -1.233308 | -0.065272 |
| H | -2.200988  | -0.579874 | -0.924175 |
| H | -1.888756  | -0.597427 | 0.812680  |
| C | -3.157481  | -2.228229 | 0.127080  |
| H | -3.218226  | -2.872452 | -0.756787 |
| H | -2.917027  | -2.879860 | 0.974366  |
| C | -4.503130  | -1.533561 | 0.362563  |
| H | -4.722491  | -0.875124 | -0.486113 |
| H | -4.434801  | -0.881917 | 1.242052  |
| C | -5.649666  | -2.531610 | 0.557138  |
| H | -5.745141  | -3.164845 | -0.331642 |
| H | -5.408734  | -3.198686 | 1.392631  |
| C | -7.014749  | -1.876326 | 0.847945  |
| H | -6.926370  | -1.218356 | 1.715228  |
| C | -8.084705  | -2.956605 | 1.138533  |
| H | -8.225073  | -3.564849 | 0.239429  |
| C | -9.370412  | -2.407241 | 1.562250  |
| H | -7.704044  | -3.626364 | 1.916670  |
| C | -10.419926 | -1.935892 | 1.911824  |
| H | -11.353535 | -1.528727 | 2.221294  |
| O | -7.448786  | 0.277398  | -0.063142 |
| C | -7.859971  | 1.165362  | -1.145236 |
| C | -7.797507  | 2.576774  | -0.636877 |
| H | -8.868931  | 0.880126  | -1.448062 |
| H | -7.194874  | 1.006805  | -1.995123 |
| C | -6.724237  | 3.407014  | -0.968960 |
| C | -8.809658  | 3.075739  | 0.190115  |
| C | -6.662178  | 4.713806  | -0.487855 |
| H | -5.932313  | 3.029857  | -1.609434 |
| C | -8.749182  | 4.378882  | 0.675097  |
| H | -9.646894  | 2.437201  | 0.455889  |
| H | -5.824571  | 5.349367  | -0.756204 |
| C | -7.674665  | 5.201386  | 0.335514  |
| H | -9.541179  | 4.755221  | 1.314456  |
| H | -7.629018  | 6.218893  | 0.710081  |
| H | 8.038771   | -1.632635 | -0.666554 |

80 atoms

addition of another  $\epsilon$ -CL unit to the 7-isomer chain end,  
structure I1, in toluene

|   |           |           |           |
|---|-----------|-----------|-----------|
| O | -3.213170 | -0.668834 | -2.310576 |
| O | -5.034498 | -0.724753 | -1.092115 |
| C | -4.009604 | -1.350114 | -1.698946 |
| C | -3.911554 | -2.859537 | -1.632468 |
| H | -3.690581 | -3.136135 | -0.596338 |
| H | -3.034616 | -3.119735 | -2.225213 |
| C | -5.148374 | -3.624837 | -2.144113 |
| H | -5.490039 | -3.184511 | -3.088203 |
| H | -4.830068 | -4.643480 | -2.385985 |
| C | -6.307901 | -3.700800 | -1.145486 |
| H | -5.964532 | -4.227701 | -0.245988 |
| H | -7.106774 | -4.316774 | -1.571938 |
| C | -6.887245 | -2.343727 | -0.734812 |
| H | -7.354201 | -1.847506 | -1.593618 |
| H | -7.685559 | -2.502572 | -0.000685 |
| C | -5.879701 | -1.383652 | -0.115200 |
| H | -5.242799 | -1.859394 | 0.633293  |
| H | -6.391825 | -0.550178 | 0.363877  |
| N | -2.958948 | 3.796267  | 0.495831  |
| C | -2.966688 | 2.439827  | 0.250438  |
| N | -2.712804 | 2.038311  | -1.032017 |
| C | -2.422484 | 2.943300  | -2.129645 |
| C | -3.176806 | 4.251431  | -1.925338 |
| C | -2.826235 | 4.806912  | -0.551932 |
| C | -2.724556 | 3.216124  | 2.889546  |
| C | -3.563834 | 2.005177  | 2.484252  |
| N | -3.200426 | 1.530851  | 1.158203  |
| C | -2.935578 | 4.322119  | 1.862385  |
| H | -2.721765 | 2.449846  | -3.055934 |
| H | -1.344017 | 3.143312  | -2.205048 |
| H | -4.253383 | 4.066352  | -1.992373 |
| H | -2.912514 | 4.982026  | -2.694690 |
| H | -1.799820 | 5.203828  | -0.557856 |
| H | -3.485651 | 5.644995  | -0.298115 |
| H | -2.136119 | 5.070509  | 1.932125  |
| H | -3.879444 | 4.849432  | 2.057486  |
| H | -1.669881 | 2.923615  | 2.916698  |
| H | -2.990524 | 3.584352  | 3.885023  |
| H | -4.632383 | 2.273237  | 2.529738  |

|   |           |           |           |
|---|-----------|-----------|-----------|
| H | -3.425317 | 1.183368  | 3.192568  |
| H | -2.944834 | 1.080266  | -1.262875 |
| O | 4.001989  | 0.614332  | -1.795073 |
| O | -2.791479 | -1.193422 | 1.181527  |
| C | 4.340846  | 0.067868  | -0.772331 |
| C | 3.413734  | -0.497925 | 0.282170  |
| H | 3.560792  | 0.093971  | 1.194034  |
| H | 3.762396  | -1.504623 | 0.535076  |
| C | 1.942208  | -0.503617 | -0.129576 |
| H | 1.641927  | 0.509322  | -0.415485 |
| H | 1.819996  | -1.115407 | -1.030161 |
| C | 1.026087  | -1.025939 | 0.982586  |
| H | 1.145650  | -0.397005 | 1.874550  |
| H | 1.348342  | -2.028515 | 1.280749  |
| C | -0.448470 | -1.042923 | 0.564547  |
| H | -0.720880 | -0.054355 | 0.179163  |
| H | -0.596971 | -1.740284 | -0.269362 |
| C | -1.467685 | -1.382443 | 1.664074  |
| H | -1.291036 | -0.723389 | 2.527503  |
| C | -1.416697 | -2.844605 | 2.161274  |
| H | -2.371710 | -3.035414 | 2.660935  |
| C | -0.334496 | -3.170290 | 3.085970  |
| H | -1.382273 | -3.516932 | 1.295561  |
| C | 0.526492  | -3.451745 | 3.877962  |
| H | 1.298165  | -3.693779 | 4.569932  |
| O | 5.632880  | -0.105422 | -0.417695 |
| C | 6.625300  | 0.422266  | -1.341991 |
| C | 7.985828  | 0.117547  | -0.783118 |
| H | 6.459735  | 1.495664  | -1.450850 |
| H | 6.470796  | -0.042022 | -2.317402 |
| C | 8.613588  | 1.013711  | 0.087082  |
| C | 8.635337  | -1.077274 | -1.106835 |
| C | 9.866123  | 0.723476  | 0.622839  |
| H | 8.117875  | 1.944929  | 0.345583  |
| C | 9.887989  | -1.371365 | -0.573301 |
| H | 8.156619  | -1.780885 | -1.781658 |
| H | 10.343939 | 1.429278  | 1.294598  |
| C | 10.505797 | -0.470554 | 0.292950  |
| H | 10.382791 | -2.300986 | -0.835379 |
| H | 11.483136 | -0.696750 | 0.706969  |
| H | -2.951707 | -0.213647 | 1.079130  |

80 atoms

addition of another  $\epsilon$ -CL unit to the 7-isomer chain end,  
structure TS12, in toluene

|   |           |           |           |
|---|-----------|-----------|-----------|
| O | -4.119875 | 1.494545  | 1.387730  |
| O | -4.310177 | 1.783416  | -0.798792 |
| C | -3.578381 | 1.990721  | 0.370583  |
| C | -2.884882 | 3.350504  | 0.498037  |
| H | -2.000858 | 3.406748  | -0.140653 |
| H | -2.540152 | 3.411630  | 1.531264  |
| C | -3.818664 | 4.535986  | 0.183622  |
| H | -4.818329 | 4.338529  | 0.586831  |
| H | -3.446279 | 5.419549  | 0.713395  |
| C | -3.896580 | 4.874502  | -1.312663 |
| H | -2.881827 | 5.100574  | -1.666811 |
| H | -4.473923 | 5.796872  | -1.445687 |
| C | -4.501608 | 3.780395  | -2.201531 |
| H | -5.577171 | 3.691758  | -2.007729 |
| H | -4.399289 | 4.074737  | -3.253789 |
| C | -3.886641 | 2.393087  | -2.022654 |
| H | -2.795497 | 2.406600  | -2.074663 |
| H | -4.245052 | 1.726657  | -2.811747 |
| N | -5.191813 | -2.993490 | -0.296161 |
| C | -4.598143 | -1.805990 | -0.011562 |
| N | -5.103937 | -1.006500 | 0.930991  |
| C | -6.268107 | -1.366458 | 1.726720  |
| C | -7.222641 | -2.201006 | 0.882597  |
| C | -6.468629 | -3.393285 | 0.308214  |
| C | -3.133829 | -3.679076 | -1.500294 |
| C | -2.955732 | -2.192011 | -1.778038 |
| N | -3.494581 | -1.427685 | -0.663927 |
| C | -4.605690 | -3.963671 | -1.229500 |
| H | -6.735099 | -0.438616 | 2.059001  |
| H | -5.967090 | -1.920580 | 2.625101  |
| H | -7.624042 | -1.585218 | 0.072520  |
| H | -8.065019 | -2.556518 | 1.480586  |
| H | -6.277887 | -4.141227 | 1.088412  |
| H | -7.063129 | -3.883348 | -0.468740 |
| H | -4.728992 | -4.960308 | -0.794635 |
| H | -5.178605 | -3.947312 | -2.165232 |
| H | -2.529901 | -3.960631 | -0.632743 |
| H | -2.797732 | -4.279866 | -2.348551 |
| H | -3.452810 | -1.916144 | -2.717504 |
| H | -1.902735 | -1.927117 | -1.879868 |
| H | -4.713681 | -0.044108 | 1.049860  |
| O | 4.898665  | -1.424774 | -1.754171 |

|   |           |           |           |
|---|-----------|-----------|-----------|
| O | -2.156651 | 0.891424  | -0.118974 |
| C | 5.088680  | -0.744098 | -0.773883 |
| C | 4.017477  | -0.152510 | 0.117025  |
| H | 4.287617  | 0.886332  | 0.331649  |
| H | 4.077432  | -0.670663 | 1.082248  |
| C | 2.608015  | -0.254951 | -0.464792 |
| H | 2.571977  | 0.278437  | -1.421495 |
| H | 2.391186  | -1.302174 | -0.699524 |
| C | 1.538409  | 0.301587  | 0.481435  |
| H | 1.771353  | 1.346917  | 0.721867  |
| H | 1.579013  | -0.237817 | 1.432624  |
| C | 0.129888  | 0.220821  | -0.117938 |
| H | 0.124519  | 0.719698  | -1.093827 |
| H | -0.125895 | -0.829714 | -0.314092 |
| C | -1.016765 | 0.855147  | 0.692967  |
| H | -0.708010 | 1.878583  | 0.964615  |
| C | -1.326695 | 0.103439  | 2.029693  |
| H | -2.329135 | 0.421523  | 2.326839  |
| C | -0.410705 | 0.353295  | 3.138219  |
| H | -1.382877 | -0.973873 | 1.827380  |
| C | 0.317589  | 0.587128  | 4.068949  |
| H | 0.967583  | 0.793384  | 4.885907  |
| O | 6.320732  | -0.423138 | -0.322942 |
| C | 7.439595  | -0.960542 | -1.082440 |
| C | 8.708920  | -0.471391 | -0.445460 |
| H | 7.346592  | -0.626122 | -2.117033 |
| H | 7.372087  | -2.049964 | -1.073835 |
| C | 9.277479  | 0.743943  | -0.838299 |
| C | 9.329145  | -1.212477 | 0.564541  |
| C | 10.443470 | 1.209795  | -0.235506 |
| H | 8.803641  | 1.328018  | -1.621868 |
| C | 10.495549 | -0.750311 | 1.169806  |
| H | 8.895601  | -2.157711 | 0.877983  |
| H | 10.876248 | 2.153343  | -0.551941 |
| C | 11.054911 | 0.462492  | 0.770230  |
| H | 10.968781 | -1.336910 | 1.950612  |
| H | 11.965156 | 0.822579  | 1.238792  |
| H | -3.019632 | -0.524948 | -0.413111 |

80 atoms

addition of another  $\epsilon$ -CL unit to the 7-is chain end, structure I2, in toluene

|   |           |          |          |
|---|-----------|----------|----------|
| O | -3.598723 | 1.219401 | 1.642544 |
|---|-----------|----------|----------|

|   |           |           |           |
|---|-----------|-----------|-----------|
| O | -3.988881 | 1.941889  | -0.443749 |
| C | -3.004616 | 1.797121  | 0.553897  |
| C | -2.355772 | 3.122294  | 0.994955  |
| H | -1.521273 | 3.359961  | 0.328422  |
| H | -1.931799 | 2.947143  | 1.985086  |
| C | -3.325098 | 4.314425  | 1.059193  |
| H | -4.280331 | 3.986320  | 1.480957  |
| H | -2.916510 | 5.048752  | 1.761494  |
| C | -3.539556 | 5.016072  | -0.291306 |
| H | -2.559198 | 5.317344  | -0.684320 |
| H | -4.095045 | 5.946426  | -0.127775 |
| C | -4.273441 | 4.186286  | -1.351763 |
| H | -5.327753 | 4.073929  | -1.074312 |
| H | -4.258399 | 4.722589  | -2.308899 |
| C | -3.706187 | 2.786111  | -1.567041 |
| H | -2.631862 | 2.801667  | -1.774602 |
| H | -4.195729 | 2.311371  | -2.421153 |
| N | -5.877324 | -2.657936 | -0.485115 |
| C | -4.974659 | -1.681122 | -0.131983 |
| N | -4.934676 | -1.088269 | 1.027791  |
| C | -5.868855 | -1.527751 | 2.053773  |
| C | -7.216455 | -1.928344 | 1.457764  |
| C | -6.990432 | -3.003089 | 0.401975  |
| C | -4.617507 | -3.122073 | -2.577669 |
| C | -4.178369 | -1.667848 | -2.473047 |
| N | -4.020625 | -1.347844 | -1.065588 |
| C | -5.912358 | -3.307942 | -1.796432 |
| H | -5.994907 | -0.713602 | 2.773169  |
| H | -5.451091 | -2.375436 | 2.618975  |
| H | -7.681054 | -1.049400 | 0.998950  |
| H | -7.901381 | -2.302486 | 2.224385  |
| H | -6.792519 | -3.973929 | 0.876566  |
| H | -7.887799 | -3.128790 | -0.214349 |
| H | -6.113322 | -4.374340 | -1.643139 |
| H | -6.758801 | -2.908144 | -2.374303 |
| H | -3.831199 | -3.761456 | -2.166067 |
| H | -4.776556 | -3.413610 | -3.619174 |
| H | -4.912277 | -1.013793 | -2.969649 |
| H | -3.217068 | -1.510497 | -2.966599 |
| H | -4.107961 | 0.398393  | 1.358793  |
| O | 5.216250  | 0.664688  | -2.147778 |
| O | -2.037519 | 0.908754  | -0.068471 |
| C | 5.316002  | 0.273028  | -1.009143 |
| C | 4.171831  | 0.068850  | -0.038678 |



|   |           |           |           |
|---|-----------|-----------|-----------|
| H | 4.383970  | 0.664300  | 0.856501  |
| H | 4.202850  | -0.973888 | 0.297072  |
| C | 2.805299  | 0.419463  | -0.624485 |
| H | 2.811690  | 1.462563  | -0.957964 |
| H | 2.634448  | -0.179426 | -1.525265 |
| C | 1.662961  | 0.196392  | 0.372562  |
| H | 1.836418  | 0.802084  | 1.270803  |
| H | 1.671443  | -0.844384 | 0.709507  |
| C | 0.299510  | 0.548895  | -0.231187 |
| H | 0.332730  | 1.571866  | -0.622332 |
| H | 0.098463  | -0.097375 | -1.094776 |
| C | -0.907926 | 0.469554  | 0.708737  |
| H | -0.761541 | 1.141840  | 1.557821  |
| C | -1.206061 | -0.948623 | 1.259512  |
| H | -2.249151 | -0.963513 | 1.582185  |
| C | -0.368664 | -1.360018 | 2.382970  |
| H | -1.126922 | -1.676713 | 0.443801  |
| C | 0.288498  | -1.694090 | 3.334053  |
| H | 0.875918  | -1.989648 | 4.170956  |
| O | 6.495201  | -0.044877 | -0.434241 |
| C | 7.676055  | 0.105942  | -1.272316 |
| C | 8.872501  | -0.311353 | -0.465942 |
| H | 7.742067  | 1.147256  | -1.592189 |
| H | 7.547575  | -0.511922 | -2.162780 |
| C | 9.593182  | 0.628610  | 0.276186  |
| C | 9.270581  | -1.651170 | -0.428787 |
| C | 10.691515 | 0.239270  | 1.039652  |
| H | 9.292676  | 1.672106  | 0.254849  |
| C | 10.367515 | -2.044656 | 0.333713  |
| H | 8.717679  | -2.389835 | -1.001797 |
| H | 11.244561 | 0.979702  | 1.608478  |
| C | 11.080518 | -1.098942 | 1.069521  |
| H | 10.668040 | -3.087278 | 0.351334  |
| H | 11.937642 | -1.403443 | 1.661429  |
| H | -3.479052 | -0.524955 | -0.828244 |

80 atoms

addition of another  $\epsilon$ -CL unit to the 7-isomer chain end,  
structure TS23, in toluene

|   |           |          |           |
|---|-----------|----------|-----------|
| O | -3.591050 | 1.214361 | 1.645715  |
| O | -3.989372 | 1.944872 | -0.436418 |
| C | -3.001278 | 1.796342 | 0.556972  |
| C | -2.350836 | 3.119879 | 1.000533  |

|   |           |           |           |
|---|-----------|-----------|-----------|
| H | -1.519643 | 3.360493  | 0.330952  |
| H | -1.921938 | 2.940647  | 1.987818  |
| C | -3.320154 | 4.311462  | 1.074428  |
| H | -4.273416 | 3.981356  | 1.499116  |
| H | -2.908568 | 5.042880  | 1.778016  |
| C | -3.540834 | 5.018871  | -0.272057 |
| H | -2.562356 | 5.322519  | -0.667905 |
| H | -4.096229 | 5.948132  | -0.102107 |
| C | -4.278667 | 4.193271  | -1.333055 |
| H | -5.331725 | 4.079005  | -1.051669 |
| H | -4.267981 | 4.733802  | -2.287868 |
| C | -3.711535 | 2.794388  | -1.556953 |
| H | -2.638059 | 2.811424  | -1.768748 |
| H | -4.204271 | 2.323300  | -2.411248 |
| N | -5.880565 | -2.655560 | -0.485396 |
| C | -4.977321 | -1.678594 | -0.134253 |
| N | -4.930028 | -1.091076 | 1.027970  |
| C | -5.855652 | -1.537313 | 2.058783  |
| C | -7.206706 | -1.938325 | 1.470929  |
| C | -6.986072 | -3.007592 | 0.408458  |
| C | -4.634778 | -3.107688 | -2.588880 |
| C | -4.197408 | -1.653171 | -2.480852 |
| N | -4.030767 | -1.339007 | -1.073125 |
| C | -5.923865 | -3.299322 | -1.799539 |
| H | -5.978253 | -0.726718 | 2.782776  |
| H | -5.431813 | -2.386562 | 2.617056  |
| H | -7.676797 | -1.058374 | 1.019723  |
| H | -7.884999 | -2.317677 | 2.240881  |
| H | -6.782176 | -3.980119 | 0.877028  |
| H | -7.887762 | -3.132654 | -0.201640 |
| H | -6.122078 | -4.366750 | -1.649913 |
| H | -6.774952 | -2.898128 | -2.369570 |
| H | -3.844557 | -3.747525 | -2.185557 |
| H | -4.800508 | -3.394852 | -3.630554 |
| H | -4.935739 | -0.998232 | -2.969672 |
| H | -3.239704 | -1.492034 | -2.980147 |
| H | -4.101715 | 0.394695  | 1.360835  |
| O | 5.221703  | 0.679878  | -2.145536 |
| O | -2.036369 | 0.910624  | -0.072258 |
| C | 5.319230  | 0.280687  | -1.009329 |
| C | 4.173228  | 0.069307  | -0.042570 |
| H | 4.385084  | 0.655473  | 0.858750  |
| H | 4.202015  | -0.976774 | 0.282922  |
| C | 2.808003  | 0.427658  | -0.626751 |

|   |           |           |           |
|---|-----------|-----------|-----------|
| H | 2.815820  | 1.474360  | -0.948759 |
| H | 2.638016  | -0.161202 | -1.534264 |
| C | 1.664014  | 0.194667  | 0.366128  |
| H | 1.836363  | 0.790653  | 1.271040  |
| H | 1.671625  | -0.849611 | 0.692043  |
| C | 0.301500  | 0.553867  | -0.235787 |
| H | 0.335472  | 1.580833  | -0.616276 |
| H | 0.101425  | -0.083376 | -1.106270 |
| C | -0.907117 | 0.464854  | 0.701743  |
| H | -0.762409 | 1.128877  | 1.557578  |
| C | -1.205320 | -0.958689 | 1.238320  |
| H | -2.248589 | -0.976883 | 1.560355  |
| C | -0.368525 | -1.381295 | 2.358057  |
| H | -1.125774 | -1.678659 | 0.415484  |
| C | 0.287986  | -1.725013 | 3.306148  |
| H | 0.874931  | -2.028918 | 4.140388  |
| O | 6.497347  | -0.040707 | -0.434109 |
| C | 7.679892  | 0.115302  | -1.268801 |
| C | 8.874424  | -0.309061 | -0.463257 |
| H | 7.747507  | 1.158884  | -1.580828 |
| H | 7.552513  | -0.495829 | -2.164065 |
| C | 9.598563  | 0.625725  | 0.281977  |
| C | 9.267163  | -1.650593 | -0.430075 |
| C | 10.695126 | 0.229680  | 1.044600  |
| H | 9.302211  | 1.670467  | 0.263780  |
| C | 10.362195 | -2.050768 | 0.331618  |
| H | 8.711527  | -2.385277 | -1.005552 |
| H | 11.250910 | 0.966169  | 1.615868  |
| C | 11.078743 | -1.110137 | 1.070546  |
| H | 10.658546 | -3.094632 | 0.346191  |
| H | 11.934427 | -1.419878 | 1.661820  |
| H | -3.488923 | -0.516411 | -0.835607 |

80 atoms

addition of another  $\epsilon$ -CL unit to the 7-isomer chain end,  
structure I3, in toluene

|   |           |          |           |
|---|-----------|----------|-----------|
| O | -3.272341 | 1.154463 | 1.212207  |
| O | -3.900678 | 1.805823 | -0.848485 |
| C | -2.804404 | 1.707108 | 0.051906  |
| C | -2.159212 | 3.063874 | 0.383466  |
| H | -1.450367 | 3.324584 | -0.407156 |
| H | -1.571338 | 2.905954 | 1.290433  |
| C | -3.152405 | 4.217487 | 0.594916  |

|   |           |           |           |
|---|-----------|-----------|-----------|
| H | -4.029095 | 3.851298  | 1.138259  |
| H | -2.682771 | 4.966731  | 1.241035  |
| C | -3.570409 | 4.910900  | -0.711590 |
| H | -2.663544 | 5.265252  | -1.219550 |
| H | -4.150680 | 5.809478  | -0.473479 |
| C | -4.384249 | 4.046794  | -1.683417 |
| H | -5.390763 | 3.880616  | -1.282716 |
| H | -4.511397 | 4.587086  | -2.629861 |
| C | -3.782848 | 2.676294  | -1.983864 |
| H | -2.741162 | 2.737200  | -2.311184 |
| H | -4.345034 | 2.190575  | -2.785650 |
| N | -6.306245 | -2.587512 | -0.058205 |
| C | -5.416009 | -1.539623 | -0.075060 |
| N | -4.705688 | -1.149225 | 0.946756  |
| C | -4.812775 | -1.903515 | 2.187302  |
| C | -6.226387 | -2.438068 | 2.404738  |
| C | -6.632674 | -3.270823 | 1.195370  |
| C | -6.522792 | -2.485523 | -2.530240 |
| C | -6.178772 | -1.011060 | -2.367419 |
| N | -5.236635 | -0.886270 | -1.270086 |
| C | -7.090621 | -3.012908 | -1.218467 |
| H | -4.518658 | -1.248473 | 3.012288  |
| H | -4.098937 | -2.741662 | 2.192688  |
| H | -6.915955 | -1.595668 | 2.523044  |
| H | -6.290758 | -3.047607 | 3.310866  |
| H | -6.137341 | -4.251161 | 1.218699  |
| H | -7.711938 | -3.460106 | 1.205885  |
| H | -7.115519 | -4.108401 | -1.229597 |
| H | -8.130479 | -2.675213 | -1.096671 |
| H | -5.615557 | -3.034899 | -2.797838 |
| H | -7.253734 | -2.634472 | -3.329268 |
| H | -7.096391 | -0.425275 | -2.198993 |
| H | -5.704111 | -0.618551 | -3.269462 |
| H | -3.818119 | 0.327463  | 1.029950  |
| O | 5.611796  | 1.345551  | -1.675310 |
| O | -1.874560 | 0.854472  | -0.638047 |
| C | 5.580527  | 0.631859  | -0.700941 |
| C | 4.331073  | 0.142493  | 0.000145  |
| H | 4.388072  | 0.467949  | 1.045222  |
| H | 4.376866  | -0.951647 | 0.038303  |
| C | 3.036109  | 0.618951  | -0.655365 |
| H | 3.031102  | 1.713376  | -0.692824 |
| H | 3.015548  | 0.285571  | -1.698379 |
| C | 1.787234  | 0.115591  | 0.076549  |

|   |           |           |           |
|---|-----------|-----------|-----------|
| H | 1.809393  | 0.460475  | 1.118098  |
| H | 1.808166  | -0.977156 | 0.124758  |
| C | 0.495420  | 0.593726  | -0.595100 |
| H | 0.531755  | 1.683409  | -0.703820 |
| H | 0.433212  | 0.191300  | -1.613842 |
| C | -0.813833 | 0.260195  | 0.127929  |
| H | -0.808601 | 0.679933  | 1.136955  |
| C | -1.132277 | -1.252688 | 0.235359  |
| H | -2.204402 | -1.340724 | 0.433762  |
| C | -0.407208 | -1.976061 | 1.276448  |
| H | -0.959017 | -1.722890 | -0.740092 |
| C | 0.152129  | -2.577224 | 2.156435  |
| H | 0.657224  | -3.104130 | 2.931052  |
| O | 6.689072  | 0.163147  | -0.088958 |
| C | 7.959769  | 0.571313  | -0.670154 |
| C | 9.061037  | -0.032062 | 0.153892  |
| H | 8.002383  | 1.661821  | -0.673890 |
| H | 7.991256  | 0.230092  | -1.706355 |
| C | 9.559456  | 0.640189  | 1.273937  |
| C | 9.589396  | -1.284130 | -0.173342 |
| C | 10.566557 | 0.073806  | 2.051544  |
| H | 9.156194  | 1.613651  | 1.537374  |
| C | 10.597140 | -1.853932 | 0.601497  |
| H | 9.209417  | -1.815211 | -1.041201 |
| H | 10.946878 | 0.607509  | 2.916537  |
| C | 11.087577 | -1.175176 | 1.715939  |
| H | 11.001047 | -2.825134 | 0.334446  |
| H | 11.874734 | -1.616253 | 2.318917  |
| H | -4.712898 | -0.020327 | -1.188292 |

80 atoms

addition of another  $\epsilon$ -CL unit to the 7-isomer chain end,  
structure TS3r, in toluene

|   |           |          |           |
|---|-----------|----------|-----------|
| O | -2.858353 | 0.876531 | 1.487632  |
| O | -4.049746 | 1.833686 | -0.158592 |
| C | -2.796229 | 1.843637 | 0.529333  |
| C | -2.486945 | 3.193663 | 1.195723  |
| H | -2.013414 | 3.848840 | 0.460084  |
| H | -1.725578 | 2.974870 | 1.948791  |
| C | -3.691620 | 3.900716 | 1.833229  |
| H | -4.335653 | 3.163409 | 2.323548  |
| H | -3.327430 | 4.563072 | 2.625900  |
| C | -4.497076 | 4.750834 | 0.836697  |

|   |           |           |           |
|---|-----------|-----------|-----------|
| H | -3.813443 | 5.470867  | 0.367655  |
| H | -5.232956 | 5.350055  | 1.384799  |
| C | -5.227908 | 3.965850  | -0.260716 |
| H | -6.077067 | 3.423972  | 0.171955  |
| H | -5.647935 | 4.668850  | -0.991047 |
| C | -4.366880 | 2.947899  | -1.005014 |
| H | -3.451758 | 3.388704  | -1.409302 |
| H | -4.922337 | 2.531820  | -1.849937 |
| N | -5.730703 | -2.924978 | 0.101644  |
| C | -5.029551 | -1.743408 | 0.116992  |
| N | -3.995436 | -1.498286 | 0.871729  |
| C | -3.495740 | -2.568418 | 1.723510  |
| C | -4.627606 | -3.449843 | 2.246839  |
| C | -5.428117 | -3.984867 | 1.065946  |
| C | -6.981118 | -2.193705 | -1.917223 |
| C | -6.732131 | -0.783851 | -1.397802 |
| N | -5.427098 | -0.763761 | -0.761823 |
| C | -6.888960 | -3.177569 | -0.757119 |
| H | -2.948014 | -2.115634 | 2.555006  |
| H | -2.767972 | -3.185380 | 1.175834  |
| H | -5.278302 | -2.854006 | 2.895499  |
| H | -4.244470 | -4.284826 | 2.840786  |
| H | -4.879400 | -4.792505 | 0.562549  |
| H | -6.377650 | -4.411098 | 1.408482  |
| H | -6.815242 | -4.203166 | -1.135823 |
| H | -7.805654 | -3.130477 | -0.150979 |
| H | -6.228639 | -2.430871 | -2.674786 |
| H | -7.965841 | -2.274095 | -2.384888 |
| H | -7.537888 | -0.487019 | -0.707901 |
| H | -6.723651 | -0.061172 | -2.216751 |
| H | -3.320410 | 0.036234  | 1.165862  |
| O | 5.730626  | 2.192867  | -0.971619 |
| O | -1.785635 | 1.619237  | -0.477069 |
| C | 5.627817  | 1.057802  | -0.570873 |
| C | 4.330970  | 0.307436  | -0.353953 |
| H | 4.336252  | -0.080711 | 0.670580  |
| H | 4.351953  | -0.580353 | -0.996738 |
| C | 3.084419  | 1.149306  | -0.620690 |
| H | 3.098146  | 2.031553  | 0.028249  |
| H | 3.120439  | 1.533301  | -1.645516 |
| C | 1.787621  | 0.361805  | -0.403639 |
| H | 1.759493  | -0.019555 | 0.625117  |
| H | 1.784643  | -0.520699 | -1.049275 |
| C | 0.543648  | 1.218707  | -0.663865 |

|   |           |           |           |
|---|-----------|-----------|-----------|
| H | 0.613304  | 2.136359  | -0.069661 |
| H | 0.522422  | 1.539560  | -1.712895 |
| C | -0.809130 | 0.583066  | -0.320004 |
| H | -0.811242 | 0.240374  | 0.716570  |
| C | -1.235449 | -0.592469 | -1.236662 |
| H | -2.298283 | -0.773427 | -1.055184 |
| C | -0.525301 | -1.852885 | -1.034950 |
| H | -1.142332 | -0.273083 | -2.281404 |
| C | 0.022512  | -2.911257 | -0.865866 |
| H | 0.522438  | -3.838626 | -0.714782 |
| O | 6.688465  | 0.283159  | -0.256746 |
| C | 7.998665  | 0.892248  | -0.432405 |
| C | 9.035069  | -0.111662 | -0.015085 |
| H | 8.041920  | 1.799305  | 0.172714  |
| H | 8.107360  | 1.180990  | -1.479378 |
| C | 9.485301  | -0.159426 | 1.307476  |
| C | 9.548867  | -1.028021 | -0.937486 |
| C | 10.431223 | -1.102920 | 1.701719  |
| H | 9.092794  | 0.547733  | 2.032410  |
| C | 10.494664 | -1.973152 | -0.547329 |
| H | 9.206025  | -0.999967 | -1.967715 |
| H | 10.774817 | -1.126984 | 2.730827  |
| C | 10.937803 | -2.011850 | 0.774017  |
| H | 10.887910 | -2.676724 | -1.274008 |
| H | 11.677172 | -2.745500 | 1.078739  |
| H | -4.987626 | 0.135360  | -0.588485 |

80 atoms

addition of another  $\epsilon$ -CL unit to the 7-isomer chain end,  
structure I3r, in toluene

|   |           |          |           |
|---|-----------|----------|-----------|
| O | -3.052956 | 0.971910 | 1.601990  |
| O | -4.483393 | 0.752893 | -0.116584 |
| C | -3.735010 | 1.702505 | 0.663414  |
| C | -4.607193 | 2.744027 | 1.376677  |
| H | -4.788986 | 3.581250 | 0.697603  |
| H | -3.983821 | 3.131065 | 2.185034  |
| C | -5.934447 | 2.207727 | 1.929562  |
| H | -5.777956 | 1.214102 | 2.362148  |
| H | -6.249390 | 2.853333 | 2.756152  |
| C | -7.069178 | 2.176214 | 0.892732  |
| H | -7.183434 | 3.185296 | 0.474981  |
| H | -8.014979 | 1.952861 | 1.399202  |
| C | -6.883158 | 1.176661 | -0.255941 |

|   |           |           |           |
|---|-----------|-----------|-----------|
| H | -7.004054 | 0.152909  | 0.117195  |
| H | -7.672548 | 1.329858  | -1.002488 |
| C | -5.529952 | 1.254455  | -0.958070 |
| H | -5.293111 | 2.270823  | -1.286988 |
| H | -5.529436 | 0.618076  | -1.847587 |
| N | -2.144363 | -3.728237 | 0.237579  |
| C | -2.559990 | -2.417754 | 0.247886  |
| N | -2.027219 | -1.470429 | 0.967699  |
| C | -0.872392 | -1.801034 | 1.788712  |
| C | -0.958367 | -3.221725 | 2.342586  |
| C | -1.129893 | -4.196676 | 1.184299  |
| C | -3.585280 | -4.201917 | -1.728879 |
| C | -4.458445 | -3.071341 | -1.200278 |
| N | -3.590723 | -2.078845 | -0.594033 |
| C | -2.759796 | -4.772866 | -0.582387 |
| H | -0.813043 | -1.074670 | 2.604203  |
| H | 0.058633  | -1.690647 | 1.210355  |
| H | -1.817873 | -3.292750 | 3.017289  |
| H | -0.065147 | -3.484542 | 2.916897  |
| H | -0.176411 | -4.341749 | 0.658154  |
| H | -1.440805 | -5.179993 | 1.554644  |
| H | -1.961442 | -5.413683 | -0.973212 |
| H | -3.391591 | -5.409417 | 0.054693  |
| H | -2.927339 | -3.807833 | -2.508782 |
| H | -4.192841 | -4.996093 | -2.170516 |
| H | -5.200420 | -3.467944 | -0.489290 |
| H | -5.010817 | -2.592286 | -2.011762 |
| H | -2.739365 | 0.077863  | 1.265223  |
| O | 4.489383  | 2.324400  | 1.603731  |
| O | -2.895034 | 2.456759  | -0.202162 |
| C | 4.472040  | 1.541899  | 0.683714  |
| C | 3.263363  | 1.181091  | -0.153312 |
| H | 3.148588  | 0.091734  | -0.119653 |
| H | 3.503729  | 1.410984  | -1.197762 |
| C | 1.979719  | 1.884535  | 0.284049  |
| H | 1.776253  | 1.648566  | 1.333729  |
| H | 2.130284  | 2.968660  | 0.246641  |
| C | 0.775792  | 1.494890  | -0.580635 |
| H | 0.629396  | 0.408434  | -0.535717 |
| H | 0.991615  | 1.724966  | -1.628489 |
| C | -0.509293 | 2.198037  | -0.130668 |
| H | -0.667083 | 2.015238  | 0.935801  |
| H | -0.404373 | 3.284384  | -0.244722 |
| C | -1.800681 | 1.765558  | -0.833279 |



|   |           |           |           |
|---|-----------|-----------|-----------|
| H | -1.936419 | 0.686331  | -0.732698 |
| C | -1.888229 | 2.140164  | -2.331800 |
| H | -2.943064 | 2.086352  | -2.616778 |
| C | -1.123537 | 1.292163  | -3.242772 |
| H | -1.591752 | 3.188135  | -2.457706 |
| C | -0.534822 | 0.585232  | -4.018032 |
| H | 0.000533  | -0.039394 | -4.693361 |
| O | 5.563702  | 0.864343  | 0.265792  |
| C | 6.797892  | 1.133816  | 0.988383  |
| C | 7.883858  | 0.294198  | 0.378371  |
| H | 6.641496  | 0.896784  | 2.042081  |
| H | 7.015369  | 2.200782  | 0.912875  |
| C | 8.179057  | -0.971234 | 0.893222  |
| C | 8.601544  | 0.757779  | -0.728529 |
| C | 9.172857  | -1.758626 | 0.315769  |
| H | 7.627911  | -1.341436 | 1.752798  |
| C | 9.595014  | -0.026459 | -1.309302 |
| H | 8.380304  | 1.739694  | -1.136615 |
| H | 9.394813  | -2.737730 | 0.727869  |
| C | 9.882704  | -1.287059 | -0.787241 |
| H | 10.146891 | 0.346576  | -2.166031 |
| H | 10.659278 | -1.897751 | -1.236416 |
| H | -3.950137 | -1.142563 | -0.439350 |

80 atoms

addition of another  $\epsilon$ -CL unit to the 7-isomer chain end,  
structure TS3r2, in toluene

|   |           |           |           |
|---|-----------|-----------|-----------|
| O | -2.784439 | -0.999326 | -1.472372 |
| O | -4.162971 | -1.149071 | 0.295966  |
| C | -3.360542 | -1.909805 | -0.620124 |
| C | -4.147002 | -2.965177 | -1.410955 |
| H | -4.248019 | -3.872537 | -0.808727 |
| H | -3.499859 | -3.223024 | -2.251730 |
| C | -5.519840 | -2.497254 | -1.911475 |
| H | -5.454604 | -1.454555 | -2.240792 |
| H | -5.783477 | -3.080203 | -2.800112 |
| C | -6.643794 | -2.669197 | -0.877671 |
| H | -6.674978 | -3.723693 | -0.573057 |
| H | -7.609230 | -2.466081 | -1.354699 |
| C | -6.521875 | -1.789877 | 0.373103  |
| H | -6.722934 | -0.743504 | 0.116035  |
| H | -7.288910 | -2.084246 | 1.100328  |
| C | -5.159896 | -1.838989 | 1.061363  |

|   |           |           |           |
|---|-----------|-----------|-----------|
| H | -4.836144 | -2.864169 | 1.266050  |
| H | -5.206935 | -1.317229 | 2.021168  |
| N | -3.403964 | 3.759953  | -0.138154 |
| C | -3.396841 | 2.385167  | -0.179623 |
| N | -3.184084 | 1.670132  | -1.246123 |
| C | -2.879927 | 2.360799  | -2.489781 |
| C | -3.619275 | 3.692902  | -2.595627 |
| C | -3.295222 | 4.541254  | -1.371879 |
| C | -3.441290 | 3.718512  | 2.342054  |
| C | -4.127372 | 2.367729  | 2.189278  |
| N | -3.588543 | 1.717759  | 1.008546  |
| C | -3.659474 | 4.536613  | 1.075401  |
| H | -3.151943 | 1.703919  | -3.320954 |
| H | -1.796160 | 2.534994  | -2.579450 |
| H | -4.697163 | 3.503989  | -2.639209 |
| H | -3.342227 | 4.234841  | -3.504632 |
| H | -2.284205 | 4.963629  | -1.452520 |
| H | -3.987772 | 5.387144  | -1.298931 |
| H | -2.993710 | 5.406701  | 1.068209  |
| H | -4.688277 | 4.926340  | 1.051483  |
| H | -2.372106 | 3.557907  | 2.507903  |
| H | -3.836923 | 4.265066  | 3.202063  |
| H | -5.218977 | 2.505316  | 2.129672  |
| H | -3.926264 | 1.728594  | 3.051893  |
| H | -3.009048 | -0.038300 | -1.272062 |
| O | 4.972887  | -2.117615 | -1.695353 |
| O | -2.383812 | -2.647101 | 0.100495  |
| C | 4.915463  | -1.333922 | -0.777926 |
| C | 3.687704  | -1.027286 | 0.053005  |
| H | 3.526992  | 0.056223  | 0.023634  |
| H | 3.931663  | -1.252350 | 1.097781  |
| C | 2.438373  | -1.783343 | -0.395620 |
| H | 2.224651  | -1.542008 | -1.442026 |
| H | 2.639483  | -2.859558 | -0.373412 |
| C | 1.216412  | -1.464286 | 0.472682  |
| H | 1.020717  | -0.384913 | 0.446427  |
| H | 1.441805  | -1.702246 | 1.517076  |
| C | -0.032390 | -2.220823 | 0.008167  |
| H | -0.210876 | -2.010821 | -1.050347 |
| H | 0.134143  | -3.302817 | 0.085058  |
| C | -1.339102 | -1.887907 | 0.733913  |
| H | -1.554710 | -0.821933 | 0.637322  |
| C | -1.375102 | -2.273560 | 2.232805  |
| H | -2.427195 | -2.328502 | 2.526789  |

|   |           |           |           |
|---|-----------|-----------|-----------|
| C | -0.693320 | -1.349331 | 3.135593  |
| H | -0.970628 | -3.285022 | 2.356476  |
| C | -0.170628 | -0.580010 | 3.898930  |
| H | 0.309026  | 0.098195  | 4.564403  |
| O | 5.973270  | -0.606690 | -0.356649 |
| C | 7.220649  | -0.818434 | -1.075749 |
| C | 8.258724  | 0.088140  | -0.478311 |
| H | 7.050351  | -0.604937 | -2.132442 |
| H | 7.497642  | -1.870270 | -0.986039 |
| C | 8.400323  | 1.402370  | -0.934237 |
| C | 9.083780  | -0.360470 | 0.556923  |
| C | 9.347876  | 2.251622  | -0.368190 |
| H | 7.764458  | 1.761294  | -1.738315 |
| C | 10.033461 | 0.485614  | 1.125380  |
| H | 8.982292  | -1.379386 | 0.919036  |
| H | 9.449934  | 3.268387  | -0.733591 |
| C | 10.166925 | 1.793902  | 0.663310  |
| H | 10.670203 | 0.123477  | 1.926086  |
| H | 10.908267 | 2.453404  | 1.102919  |
| H | -3.762468 | 0.726697  | 0.880213  |

80 atoms

addition of another  $\epsilon$ -CL unit to the 7-isomer chain end,  
structure I3r2, in toluene

|   |           |           |           |
|---|-----------|-----------|-----------|
| O | -2.331792 | -0.568242 | -1.093684 |
| O | -3.643243 | -1.442436 | 0.502134  |
| C | -2.923778 | -1.749575 | -0.711416 |
| C | -3.813988 | -2.369070 | -1.805131 |
| H | -3.883192 | -3.448023 | -1.637352 |
| H | -3.252412 | -2.239591 | -2.732602 |
| C | -5.220006 | -1.764916 | -1.934448 |
| H | -5.176412 | -0.679299 | -1.795738 |
| H | -5.571549 | -1.928764 | -2.958689 |
| C | -6.246405 | -2.386862 | -0.974194 |
| H | -6.261480 | -3.472569 | -1.138274 |
| H | -7.249084 | -2.030007 | -1.235837 |
| C | -6.000723 | -2.108412 | 0.513780  |
| H | -6.212315 | -1.056082 | 0.735926  |
| H | -6.703105 | -2.699373 | 1.114892  |
| C | -4.582572 | -2.406053 | 0.996241  |
| H | -4.261492 | -3.417139 | 0.726170  |
| H | -4.534016 | -2.332217 | 2.086026  |
| N | -4.709213 | 3.483559  | 0.250380  |

|   |           |           |           |
|---|-----------|-----------|-----------|
| C | -4.231722 | 2.202592  | 0.101548  |
| N | -3.889704 | 1.660824  | -1.034986 |
| C | -3.950323 | 2.483976  | -2.232497 |
| C | -5.115540 | 3.469986  | -2.184568 |
| C | -5.001874 | 4.313073  | -0.920362 |
| C | -4.451981 | 3.326798  | 2.712767  |
| C | -4.650302 | 1.829421  | 2.518521  |
| N | -4.073028 | 1.455030  | 1.241374  |
| C | -5.078708 | 4.069444  | 1.539443  |
| H | -4.043055 | 1.822994  | -3.099152 |
| H | -3.008293 | 3.037785  | -2.369662 |
| H | -6.058657 | 2.913378  | -2.174657 |
| H | -5.126695 | 4.122109  | -3.062802 |
| H | -4.219075 | 5.075351  | -1.034918 |
| H | -5.939748 | 4.847337  | -0.731264 |
| H | -4.757642 | 5.116909  | 1.540023  |
| H | -6.174423 | 4.075034  | 1.639280  |
| H | -3.380754 | 3.541721  | 2.765941  |
| H | -4.909743 | 3.665775  | 3.645716  |
| H | -5.722172 | 1.582424  | 2.579584  |
| H | -4.142294 | 1.262312  | 3.301632  |
| H | -2.971415 | 0.209153  | -1.068846 |
| O | 5.232816  | -0.949530 | -2.293718 |
| O | -1.929233 | -2.711281 | -0.455060 |
| C | 5.223844  | -0.651303 | -1.123187 |
| C | 4.072085  | -0.857189 | -0.162621 |
| H | 3.871069  | 0.100655  | 0.329642  |
| H | 4.424660  | -1.521121 | 0.635567  |
| C | 2.812671  | -1.414779 | -0.823742 |
| H | 2.488037  | -0.734024 | -1.617728 |
| H | 3.053299  | -2.359993 | -1.321419 |
| C | 1.671244  | -1.628071 | 0.176613  |
| H | 1.437969  | -0.677004 | 0.671993  |
| H | 2.004333  | -2.305026 | 0.969424  |
| C | 0.408062  | -2.172018 | -0.499435 |
| H | 0.125672  | -1.509337 | -1.321482 |
| H | 0.614085  | -3.152827 | -0.946960 |
| C | -0.833123 | -2.299814 | 0.388195  |
| H | -1.073912 | -1.335700 | 0.837661  |
| C | -0.738499 | -3.370097 | 1.501036  |
| H | -1.760181 | -3.599538 | 1.817420  |
| C | 0.030574  | -2.980710 | 2.680348  |
| H | -0.333762 | -4.297328 | 1.078647  |
| C | 0.626059  | -2.663761 | 3.676490  |

|   |           |           |           |
|---|-----------|-----------|-----------|
| H | 1.165789  | -2.378545 | 4.548430  |
| O | 6.275914  | -0.081366 | -0.495680 |
| C | 7.452950  | 0.160775  | -1.316386 |
| C | 8.496427  | 0.807124  | -0.450498 |
| H | 7.164015  | 0.798827  | -2.153436 |
| H | 7.793974  | -0.792763 | -1.723245 |
| C | 8.513397  | 2.194393  | -0.276086 |
| C | 9.452913  | 0.031368  | 0.210424  |
| C | 9.467363  | 2.795204  | 0.541431  |
| H | 7.774638  | 2.806698  | -0.784982 |
| C | 10.409690 | 0.628561  | 1.028348  |
| H | 9.448789  | -1.047167 | 0.082456  |
| H | 9.471531  | 3.873286  | 0.665773  |
| C | 10.418279 | 2.012391  | 1.195159  |
| H | 11.149006 | 0.014838  | 1.532799  |
| H | 11.164649 | 2.479542  | 1.829578  |
| H | -3.852822 | 0.479392  | 1.070514  |

80 atoms

addition of another  $\epsilon$ -CL unit to the 7-isomer chain end,  
structure TS34, in toluene

|   |           |           |           |
|---|-----------|-----------|-----------|
| O | -2.767093 | 0.768035  | 1.339768  |
| O | -3.766209 | 1.398827  | -0.841532 |
| C | -2.695847 | 1.825535  | 0.684234  |
| C | -3.359837 | 3.110908  | 1.165289  |
| H | -3.089289 | 3.931179  | 0.496629  |
| H | -2.863446 | 3.324444  | 2.119636  |
| C | -4.881785 | 3.051910  | 1.369647  |
| H | -5.183354 | 2.018691  | 1.567599  |
| H | -5.133489 | 3.619138  | 2.273019  |
| C | -5.702125 | 3.643216  | 0.210205  |
| H | -5.314845 | 4.648755  | -0.003986 |
| H | -6.734598 | 3.792249  | 0.550927  |
| C | -5.732830 | 2.832125  | -1.091971 |
| H | -6.335558 | 1.926270  | -0.944456 |
| H | -6.249331 | 3.424367  | -1.860712 |
| C | -4.360107 | 2.392151  | -1.624107 |
| H | -3.697464 | 3.271178  | -1.714285 |
| H | -4.495190 | 2.022641  | -2.656972 |
| N | -5.793046 | -2.868917 | 0.261491  |
| C | -5.131889 | -1.685353 | 0.262452  |
| N | -4.705041 | -1.145319 | 1.414190  |
| C | -4.788049 | -1.849368 | 2.685717  |

|   |           |           |           |
|---|-----------|-----------|-----------|
| C | -6.063846 | -2.678977 | 2.715290  |
| C | -6.097380 | -3.596861 | 1.499779  |
| C | -5.386071 | -3.027272 | -2.170341 |
| C | -5.345941 | -1.505214 | -2.171303 |
| N | -4.902259 | -1.023295 | -0.871200 |
| C | -6.218823 | -3.508828 | -0.989102 |
| H | -4.781621 | -1.101922 | 3.480407  |
| H | -3.909461 | -2.490987 | 2.834075  |
| H | -6.932128 | -2.013545 | 2.705121  |
| H | -6.114746 | -3.278561 | 3.626879  |
| H | -5.384223 | -4.422406 | 1.618780  |
| H | -7.090047 | -4.041503 | 1.385665  |
| H | -6.107609 | -4.588842 | -0.859920 |
| H | -7.284945 | -3.310115 | -1.157420 |
| H | -4.367965 | -3.419521 | -2.091483 |
| H | -5.817119 | -3.403055 | -3.101075 |
| H | -6.335763 | -1.098502 | -2.416872 |
| H | -4.646387 | -1.130233 | -2.920285 |
| H | -4.042741 | -0.350297 | 1.353633  |
| O | 6.065650  | 2.408910  | 0.370526  |
| O | -1.497456 | 2.176976  | 0.069046  |
| C | 5.885230  | 1.230706  | 0.174146  |
| C | 4.546020  | 0.563354  | -0.055731 |
| H | 4.468213  | -0.281561 | 0.637135  |
| H | 4.571371  | 0.112866  | -1.055080 |
| C | 3.355438  | 1.510099  | 0.087260  |
| H | 3.354531  | 1.942193  | 1.093762  |
| H | 3.480600  | 2.354163  | -0.598785 |
| C | 2.017191  | 0.813711  | -0.181666 |
| H | 1.896501  | -0.029506 | 0.510131  |
| H | 2.030462  | 0.376235  | -1.185191 |
| C | 0.827388  | 1.767629  | -0.036184 |
| H | 0.853064  | 2.232172  | 0.955835  |
| H | 0.917423  | 2.588395  | -0.758895 |
| C | -0.552532 | 1.128955  | -0.196872 |
| H | -0.701410 | 0.340971  | 0.543729  |
| C | -0.852798 | 0.559770  | -1.606925 |
| H | -1.943746 | 0.566846  | -1.701081 |
| C | -0.348846 | -0.787376 | -1.852239 |
| H | -0.466276 | 1.248748  | -2.367974 |
| C | 0.035218  | -1.910602 | -2.055715 |
| H | 0.389849  | -2.898307 | -2.232200 |
| O | 6.887187  | 0.325643  | 0.125706  |
| C | 8.230772  | 0.851838  | 0.314731  |

|   |           |           |           |
|---|-----------|-----------|-----------|
| C | 9.195565  | -0.295295 | 0.217754  |
| H | 8.276952  | 1.342533  | 1.288370  |
| H | 8.415951  | 1.607208  | -0.451097 |
| C | 9.602962  | -0.981272 | 1.365304  |
| C | 9.684830  | -0.707570 | -1.025608 |
| C | 10.483419 | -2.057236 | 1.274474  |
| H | 9.228800  | -0.669924 | 2.336237  |
| C | 10.564173 | -1.783201 | -1.120897 |
| H | 9.374891  | -0.181525 | -1.923872 |
| H | 10.794564 | -2.578847 | 2.173827  |
| C | 10.965613 | -2.460032 | 0.030272  |
| H | 10.939052 | -2.091066 | -2.091691 |
| H | 11.653802 | -3.296065 | -0.042171 |
| H | -4.448167 | -0.064079 | -0.822739 |

80 atoms

addition of another  $\epsilon$ -CL unit to the 7-isomer chain end,  
structure I4, in toluene

|   |           |           |           |
|---|-----------|-----------|-----------|
| O | -2.752751 | 1.136893  | 1.410946  |
| O | -4.237288 | 1.474253  | -1.290605 |
| C | -2.560130 | 2.175076  | 0.815132  |
| C | -3.438137 | 3.404145  | 0.861644  |
| H | -3.449307 | 3.827107  | -0.143417 |
| H | -2.901940 | 4.136184  | 1.477820  |
| C | -4.860460 | 3.171768  | 1.406776  |
| H | -4.965049 | 2.128075  | 1.712675  |
| H | -4.984088 | 3.761127  | 2.320595  |
| C | -6.002071 | 3.546689  | 0.442423  |
| H | -5.772842 | 4.507792  | -0.037800 |
| H | -6.898847 | 3.730399  | 1.045843  |
| C | -6.387300 | 2.518315  | -0.634217 |
| H | -6.661166 | 1.570225  | -0.155362 |
| H | -7.298186 | 2.881505  | -1.129393 |
| C | -5.358758 | 2.221071  | -1.731390 |
| H | -4.973618 | 3.157627  | -2.151081 |
| H | -5.867160 | 1.693582  | -2.552278 |
| N | -5.466551 | -3.133468 | 0.337180  |
| C | -5.050422 | -1.826030 | 0.219304  |
| N | -4.633871 | -1.195797 | 1.371847  |
| C | -4.254086 | -1.945608 | 2.557533  |
| C | -5.322255 | -2.999146 | 2.812293  |
| C | -5.435355 | -3.896054 | 1.586275  |
| C | -5.270964 | -3.268812 | -2.118228 |

|   |           |           |           |
|---|-----------|-----------|-----------|
| C | -5.575142 | -1.773099 | -2.088542 |
| N | -5.062625 | -1.136531 | -0.884860 |
| C | -5.824291 | -3.909513 | -0.851868 |
| H | -4.182323 | -1.244360 | 3.391192  |
| H | -3.268470 | -2.424759 | 2.448459  |
| H | -6.276504 | -2.500532 | 3.006261  |
| H | -5.076889 | -3.607037 | 3.687083  |
| H | -4.592022 | -4.602241 | 1.559681  |
| H | -6.348668 | -4.499523 | 1.639397  |
| H | -5.422405 | -4.921349 | -0.728151 |
| H | -6.917005 | -4.007072 | -0.914551 |
| H | -4.186578 | -3.413652 | -2.163271 |
| H | -5.706742 | -3.750962 | -2.998335 |
| H | -6.662988 | -1.620635 | -2.174381 |
| H | -5.127586 | -1.275352 | -2.953968 |
| H | -4.122217 | -0.336800 | 1.208643  |
| O | 6.098459  | 2.474135  | 0.346805  |
| O | -1.463858 | 2.411687  | 0.068129  |
| C | 5.900806  | 1.298253  | 0.152709  |
| C | 4.548627  | 0.650332  | -0.058115 |
| H | 4.454873  | -0.171058 | 0.660763  |
| H | 4.562656  | 0.169498  | -1.043068 |
| C | 3.379626  | 1.626650  | 0.060068  |
| H | 3.397102  | 2.094696  | 1.049994  |
| H | 3.516151  | 2.442293  | -0.657423 |
| C | 2.025445  | 0.948489  | -0.172752 |
| H | 1.892207  | 0.135480  | 0.551708  |
| H | 2.019249  | 0.474260  | -1.158922 |
| C | 0.860026  | 1.936357  | -0.053634 |
| H | 0.911301  | 2.439858  | 0.918241  |
| H | 0.957631  | 2.723056  | -0.811306 |
| C | -0.532333 | 1.319817  | -0.169501 |
| H | -0.692934 | 0.566970  | 0.602099  |
| C | -0.892711 | 0.729174  | -1.552189 |
| H | -1.983517 | 0.734773  | -1.645054 |
| C | -0.400579 | -0.627584 | -1.773399 |
| H | -0.517524 | 1.395877  | -2.337522 |
| C | -0.021700 | -1.754652 | -1.956278 |
| H | 0.319191  | -2.749877 | -2.117920 |
| O | 6.887676  | 0.379347  | 0.092288  |
| C | 8.241847  | 0.884574  | 0.268515  |
| C | 9.187653  | -0.276958 | 0.159249  |
| H | 8.304786  | 1.372357  | 1.242657  |
| H | 8.430048  | 1.638587  | -0.497774 |



|   |           |           |           |
|---|-----------|-----------|-----------|
| C | 9.588897  | -0.977307 | 1.300314  |
| C | 9.665060  | -0.687975 | -1.089092 |
| C | 10.451767 | -2.066341 | 1.198110  |
| H | 9.223940  | -0.666944 | 2.275067  |
| C | 10.526914 | -1.776646 | -1.195677 |
| H | 9.359965  | -0.150660 | -1.982333 |
| H | 10.758521 | -2.599131 | 2.092377  |
| C | 10.922342 | -2.467798 | -0.051002 |
| H | 10.892951 | -2.083435 | -2.170151 |
| H | 11.596967 | -3.313982 | -0.132251 |
| H | -4.531445 | 0.544963  | -1.091268 |

80 atoms

addition of another  $\epsilon$ -CL unit to the 7-isomer chain end,  
structure I5, in toluene

|   |           |           |           |
|---|-----------|-----------|-----------|
| O | -0.792081 | -3.121395 | 0.841273  |
| O | -6.451487 | 0.729648  | -2.763854 |
| C | -0.298969 | -2.878369 | -0.233604 |
| C | -0.957266 | -2.099511 | -1.351851 |
| H | -0.917275 | -2.716891 | -2.256319 |
| H | -0.323313 | -1.231803 | -1.568893 |
| C | -2.389082 | -1.668146 | -1.038453 |
| H | -2.992820 | -2.553377 | -0.812835 |
| H | -2.393848 | -1.063880 | -0.125640 |
| C | -3.032364 | -0.881617 | -2.184860 |
| H | -3.026293 | -1.495103 | -3.095798 |
| H | -2.417680 | -0.000455 | -2.411864 |
| C | -4.465831 | -0.437607 | -1.878704 |
| H | -5.085545 | -1.312375 | -1.646785 |
| H | -4.477831 | 0.195405  | -0.984153 |
| C | -5.116335 | 0.328010  | -3.033136 |
| H | -5.155547 | -0.307580 | -3.924365 |
| H | -4.497817 | 1.201200  | -3.290650 |
| N | -8.068512 | 2.133291  | 1.424115  |
| C | -7.529030 | 1.663654  | 0.248804  |
| N | -7.811590 | 0.357687  | -0.089645 |
| C | -8.916578 | -0.374199 | 0.502027  |
| C | -8.883010 | -0.140447 | 2.006577  |
| C | -8.964385 | 1.355989  | 2.282143  |
| C | -7.487642 | 4.393355  | 0.619763  |
| C | -6.368250 | 3.687138  | -0.143500 |
| N | -6.746917 | 2.341363  | -0.542565 |
| C | -7.896918 | 3.535163  | 1.810512  |

|   |           |           |           |
|---|-----------|-----------|-----------|
| H | -8.788701 | -1.432942 | 0.266966  |
| H | -9.890684 | -0.063490 | 0.092324  |
| H | -7.951602 | -0.548930 | 2.409199  |
| H | -9.714611 | -0.647296 | 2.503036  |
| H | -9.997390 | 1.707593  | 2.141443  |
| H | -8.701455 | 1.563343  | 3.325494  |
| H | -8.845604 | 3.889717  | 2.228614  |
| H | -7.149387 | 3.607052  | 2.612480  |
| H | -8.345023 | 4.531933  | -0.047256 |
| H | -7.176257 | 5.382940  | 0.967220  |
| H | -5.459857 | 3.664779  | 0.479467  |
| H | -6.106009 | 4.251949  | -1.043016 |
| H | -7.516986 | 0.115040  | -1.028679 |
| O | 7.781107  | -1.144100 | -0.415209 |
| O | 0.943658  | -3.277120 | -0.596408 |
| C | 6.962818  | -0.314241 | -0.097253 |
| C | 5.497497  | -0.577139 | 0.180655  |
| H | 4.910157  | 0.096727  | -0.452793 |
| H | 5.293603  | -0.255990 | 1.208687  |
| C | 5.089409  | -2.033790 | -0.031697 |
| H | 5.308930  | -2.323860 | -1.064614 |
| H | 5.711366  | -2.678606 | 0.597571  |
| C | 3.608452  | -2.278437 | 0.272684  |
| H | 2.990604  | -1.630541 | -0.358327 |
| H | 3.395357  | -1.991194 | 1.310456  |
| C | 3.197320  | -3.738110 | 0.058359  |
| H | 3.396112  | -4.035363 | -0.978273 |
| H | 3.806542  | -4.390332 | 0.692255  |
| C | 1.734163  | -4.018296 | 0.373672  |
| H | 1.470216  | -3.656284 | 1.368889  |
| C | 1.348877  | -5.507300 | 0.262187  |
| H | 0.265991  | -5.593421 | 0.389916  |
| C | 2.014372  | -6.348254 | 1.252291  |
| H | 1.581952  | -5.860117 | -0.748693 |
| C | 2.559602  | -7.033191 | 2.076499  |
| H | 3.039010  | -7.644308 | 2.804531  |
| O | 7.252983  | 0.993969  | 0.060802  |
| C | 8.639968  | 1.374306  | -0.168706 |
| C | 8.752509  | 2.857789  | 0.036987  |
| H | 8.915189  | 1.080322  | -1.182842 |
| H | 9.269433  | 0.815737  | 0.526360  |
| C | 8.580636  | 3.738375  | -1.034974 |
| C | 9.008702  | 3.381342  | 1.307799  |
| C | 8.664156  | 5.115497  | -0.842610 |

|   |           |          |           |
|---|-----------|----------|-----------|
| H | 8.381256  | 3.342463 | -2.026535 |
| C | 9.092593  | 4.757610 | 1.504408  |
| H | 9.144038  | 2.706136 | 2.147685  |
| H | 8.532341  | 5.788146 | -1.683935 |
| C | 8.920527  | 5.627432 | 0.428415  |
| H | 9.295301  | 5.151166 | 2.495215  |
| H | 8.989063  | 6.699918 | 0.579419  |
| H | -6.444873 | 1.446130 | -2.077744 |

80 atoms

addition of another 3-isomer unit to the  $\epsilon$ -CL chain end,  
structure I1, in toluene

|   |           |           |           |
|---|-----------|-----------|-----------|
| N | -0.927880 | 5.274291  | 1.766960  |
| C | -1.140553 | 3.936642  | 2.022932  |
| N | -2.426410 | 3.550946  | 2.284900  |
| C | -3.562313 | 4.453814  | 2.333050  |
| C | -3.103504 | 5.830511  | 2.797365  |
| C | -1.965595 | 6.294793  | 1.898842  |
| C | 1.229160  | 4.590953  | 0.769963  |
| C | 1.162680  | 3.497719  | 1.835544  |
| N | -0.200794 | 3.030621  | 2.029862  |
| C | 0.336316  | 5.748492  | 1.200373  |
| H | -4.297225 | 4.025466  | 3.016675  |
| H | -4.045598 | 4.536389  | 1.348633  |
| H | -2.761197 | 5.771011  | 3.835146  |
| H | -3.923682 | 6.552278  | 2.754479  |
| H | -2.355720 | 6.562888  | 0.905175  |
| H | -1.499497 | 7.198609  | 2.307778  |
| H | 0.110972  | 6.399576  | 0.346372  |
| H | 0.850444  | 6.371230  | 1.945314  |
| H | 0.878715  | 4.179784  | -0.182333 |
| H | 2.250769  | 4.951843  | 0.617544  |
| H | 1.586514  | 3.883465  | 2.777412  |
| H | 1.782455  | 2.643003  | 1.549971  |
| H | -2.546951 | 2.633332  | 2.690743  |
| O | -3.578225 | 1.081190  | 3.672243  |
| C | -2.693622 | 0.503430  | 4.269741  |
| O | -1.787787 | 1.252431  | 4.919236  |
| C | -0.563122 | 0.705542  | 5.473129  |
| H | -0.066802 | 0.111256  | 4.703898  |
| H | 0.040917  | 1.594217  | 5.651932  |
| C | -0.789133 | -0.057158 | 6.771272  |
| H | -1.433391 | 0.549527  | 7.418350  |

|   |           |           |           |
|---|-----------|-----------|-----------|
| H | 0.176814  | -0.133627 | 7.283651  |
| C | -1.375179 | -1.460766 | 6.593176  |
| H | -0.641674 | -2.091626 | 6.075803  |
| H | -1.522480 | -1.913266 | 7.579563  |
| C | -2.697335 | -1.517671 | 5.819785  |
| H | -3.478145 | -0.962677 | 6.354015  |
| H | -3.029549 | -2.558939 | 5.790533  |
| C | -2.604953 | -1.013990 | 4.358752  |
| H | -1.631773 | -1.293798 | 3.944668  |
| C | -3.695603 | -1.632898 | 3.455625  |
| H | -3.665587 | -1.147652 | 2.477384  |
| C | -3.543952 | -3.075944 | 3.287243  |
| H | -4.684803 | -1.409566 | 3.868599  |
| C | -3.409861 | -4.263088 | 3.145433  |
| H | -3.296466 | -5.313086 | 3.012303  |
| O | 4.156431  | -1.714264 | -3.560124 |
| O | -0.542181 | 0.296191  | 2.227338  |
| C | 3.067176  | -1.983254 | -4.008193 |
| C | 1.744735  | -1.799827 | -3.293970 |
| H | 1.099889  | -1.190594 | -3.937260 |
| H | 1.256380  | -2.779963 | -3.244598 |
| C | 1.881976  | -1.182363 | -1.903408 |
| H | 2.382935  | -0.212164 | -1.986696 |
| H | 2.543308  | -1.806912 | -1.294136 |
| C | 0.534305  | -1.010608 | -1.195556 |
| H | -0.125405 | -0.386955 | -1.813421 |
| H | 0.037467  | -1.986720 | -1.116517 |
| C | 0.663314  | -0.391388 | 0.199324  |
| H | 1.153456  | 0.587205  | 0.125821  |
| H | 1.309482  | -1.014320 | 0.829239  |
| C | -0.678945 | -0.216573 | 0.912785  |
| H | -1.336088 | 0.430916  | 0.313655  |
| H | -1.177366 | -1.189265 | 0.996653  |
| O | 2.879207  | -2.499928 | -5.241445 |
| C | 4.082588  | -2.731536 | -6.027076 |
| C | 3.668028  | -3.309739 | -7.349904 |
| H | 4.608345  | -1.782349 | -6.143273 |
| H | 4.731847  | -3.409372 | -5.469993 |
| C | 3.473612  | -4.687179 | -7.492106 |
| C | 3.450256  | -2.479234 | -8.452719 |
| C | 3.070494  | -5.224637 | -8.711846 |
| H | 3.640134  | -5.341774 | -6.641557 |
| C | 3.048160  | -3.013091 | -9.675208 |
| H | 3.597816  | -1.407756 | -8.353581 |

|   |           |           |            |
|---|-----------|-----------|------------|
| H | 2.926117  | -6.295746 | -8.809716  |
| C | 2.857450  | -4.387534 | -9.806558  |
| H | 2.886190  | -2.357403 | -10.524640 |
| H | 2.546953  | -4.805415 | -10.758774 |
| H | -0.420577 | 1.283632  | 2.175966   |

80 atoms

addition of another 3-isomer unit to the  $\epsilon$ -CL chain end,  
structure TS12, in toluene

|   |           |           |           |
|---|-----------|-----------|-----------|
| N | -5.243822 | -3.330346 | 0.141522  |
| C | -4.538116 | -2.172457 | 0.221357  |
| N | -4.441787 | -1.522814 | 1.386589  |
| C | -5.036159 | -2.018803 | 2.618857  |
| C | -6.324857 | -2.764057 | 2.297061  |
| C | -6.031439 | -3.847046 | 1.267139  |
| C | -4.117152 | -3.802152 | -2.015052 |
| C | -4.043304 | -2.288258 | -2.167248 |
| N | -3.926653 | -1.673553 | -0.854320 |
| C | -5.262851 | -4.152818 | -1.074263 |
| H | -5.223166 | -1.157334 | 3.261056  |
| H | -4.336255 | -2.676783 | 3.150075  |
| H | -7.062685 | -2.060023 | 1.901471  |
| H | -6.746831 | -3.220226 | 3.195591  |
| H | -5.491827 | -4.683122 | 1.730340  |
| H | -6.963741 | -4.251189 | 0.861251  |
| H | -5.198327 | -5.201152 | -0.767158 |
| H | -6.228670 | -4.023426 | -1.579062 |
| H | -3.171192 | -4.173134 | -1.609640 |
| H | -4.278102 | -4.286233 | -2.981144 |
| H | -4.931331 | -1.915543 | -2.695141 |
| H | -3.171712 | -1.986159 | -2.749568 |
| H | -3.988524 | -0.587934 | 1.415233  |
| O | -3.222692 | 0.947038  | 1.626972  |
| C | -3.232925 | 1.521635  | 0.519149  |
| O | -4.446673 | 1.418170  | -0.160911 |
| C | -4.587297 | 1.988272  | -1.469824 |
| H | -3.632481 | 1.946977  | -1.997336 |
| H | -5.284673 | 1.330648  | -1.996167 |
| C | -5.156892 | 3.400803  | -1.397736 |
| H | -6.053459 | 3.367035  | -0.767354 |
| H | -5.491193 | 3.698272  | -2.399715 |
| C | -4.174391 | 4.444411  | -0.856445 |
| H | -3.397084 | 4.632249  | -1.608555 |

|   |           |           |           |
|---|-----------|-----------|-----------|
| H | -4.703688 | 5.395509  | -0.726946 |
| C | -3.486108 | 4.071988  | 0.464716  |
| H | -4.231435 | 3.869124  | 1.242742  |
| H | -2.921055 | 4.946678  | 0.801732  |
| C | -2.504627 | 2.879694  | 0.362660  |
| H | -2.022170 | 2.907970  | -0.615239 |
| C | -1.403382 | 2.985145  | 1.444590  |
| H | -0.821254 | 2.062690  | 1.470713  |
| C | -0.497385 | 4.113854  | 1.240237  |
| H | -1.876779 | 3.058862  | 2.428428  |
| C | 0.253356  | 5.037590  | 1.059794  |
| H | 0.920762  | 5.851836  | 0.903945  |
| O | 5.327229  | 0.941735  | -2.012610 |
| O | -2.272301 | 0.426589  | -0.678344 |
| C | 5.270565  | 0.216628  | -1.048085 |
| C | 4.004529  | -0.286844 | -0.388410 |
| H | 3.987618  | -1.377351 | -0.506460 |
| H | 4.095000  | -0.116545 | 0.689651  |
| C | 2.728246  | 0.342135  | -0.945626 |
| H | 2.687548  | 0.180134  | -2.027488 |
| H | 2.769768  | 1.427886  | -0.808111 |
| C | 1.460854  | -0.212970 | -0.287888 |
| H | 1.421139  | -1.300819 | -0.437497 |
| H | 1.519367  | -0.062901 | 0.798511  |
| C | 0.172753  | 0.423208  | -0.818595 |
| H | 0.103954  | 0.281282  | -1.904491 |
| H | 0.204252  | 1.506922  | -0.656992 |
| C | -1.099194 | -0.147163 | -0.177216 |
| H | -1.110549 | -1.240079 | -0.355405 |
| H | -1.056125 | -0.035532 | 0.919915  |
| O | 6.364871  | -0.263302 | -0.417098 |
| C | 7.648203  | 0.142364  | -0.970083 |
| C | 8.730421  | -0.464725 | -0.123592 |
| H | 7.702340  | -0.196669 | -2.006149 |
| H | 7.693388  | 1.232783  | -0.970861 |
| C | 9.181458  | 0.189168  | 1.027191  |
| C | 9.288381  | -1.701087 | -0.460590 |
| C | 10.170899 | -0.379891 | 1.824981  |
| H | 8.754581  | 1.150272  | 1.298586  |
| C | 10.279253 | -2.273406 | 0.334243  |
| H | 8.945253  | -2.217960 | -1.352089 |
| H | 10.514216 | 0.139538  | 2.713825  |
| C | 10.722227 | -1.613121 | 1.479071  |
| H | 10.706725 | -3.232217 | 0.059096  |

|   |           |           |           |
|---|-----------|-----------|-----------|
| H | 11.496005 | -2.056013 | 2.097862  |
| H | -3.335641 | -0.795769 | -0.764420 |

80 atoms

addition of another 3-isomer unit to the  $\epsilon$ -CL chain end,  
structure I2, in toluene

|   |           |           |           |
|---|-----------|-----------|-----------|
| N | -5.295034 | -3.432729 | 0.248575  |
| C | -4.542080 | -2.280622 | 0.270269  |
| N | -4.307751 | -1.566133 | 1.334134  |
| C | -4.825283 | -2.041866 | 2.607995  |
| C | -6.177382 | -2.732689 | 2.446667  |
| C | -6.037889 | -3.863133 | 1.435147  |
| C | -4.572461 | -3.907583 | -2.081568 |
| C | -4.418592 | -2.397147 | -2.197488 |
| N | -3.962965 | -1.891940 | -0.914931 |
| C | -5.551349 | -4.222165 | -0.957223 |
| H | -4.911576 | -1.185752 | 3.283351  |
| H | -4.112368 | -2.735890 | 3.080560  |
| H | -6.911729 | -2.003323 | 2.089532  |
| H | -6.542667 | -3.131507 | 3.397614  |
| H | -5.532914 | -4.726595 | 1.889634  |
| H | -7.025478 | -4.209065 | 1.109593  |
| H | -5.492875 | -5.283086 | -0.688741 |
| H | -6.581889 | -4.039824 | -1.296332 |
| H | -3.594893 | -4.349454 | -1.867728 |
| H | -4.939954 | -4.340825 | -3.015516 |
| H | -5.372206 | -1.942899 | -2.509556 |
| H | -3.672608 | -2.133885 | -2.950278 |
| H | -3.659021 | 0.000056  | 1.354640  |
| O | -3.229247 | 0.913845  | 1.447615  |
| C | -3.050025 | 1.467913  | 0.218104  |
| O | -4.301358 | 1.476206  | -0.432737 |
| C | -4.408005 | 2.122668  | -1.709616 |
| H | -3.435600 | 2.147368  | -2.208969 |
| H | -5.067622 | 1.490599  | -2.310280 |
| C | -5.009148 | 3.513204  | -1.549826 |
| H | -5.952999 | 3.405190  | -1.003340 |
| H | -5.264533 | 3.907759  | -2.541235 |
| C | -4.094937 | 4.502229  | -0.819591 |
| H | -3.266273 | 4.788911  | -1.480298 |
| H | -4.656525 | 5.423371  | -0.627849 |
| C | -3.505232 | 3.997569  | 0.507296  |
| H | -4.299406 | 3.646926  | 1.174416  |

|   |           |           |           |
|---|-----------|-----------|-----------|
| H | -3.037785 | 4.852876  | 1.004522  |
| C | -2.434668 | 2.893319  | 0.363732  |
| H | -1.862230 | 3.084111  | -0.548403 |
| C | -1.449204 | 2.953001  | 1.561010  |
| H | -0.803909 | 2.073189  | 1.579592  |
| C | -0.604236 | 4.145801  | 1.544275  |
| H | -2.021889 | 2.914534  | 2.491585  |
| C | 0.099900  | 5.121376  | 1.515863  |
| H | 0.723038  | 5.984115  | 1.497333  |
| O | 5.360661  | 1.060500  | -1.947552 |
| O | -2.240581 | 0.618436  | -0.647579 |
| C | 5.296767  | 0.281660  | -1.026266 |
| C | 4.023681  | -0.234623 | -0.389398 |
| H | 3.978618  | -1.313929 | -0.579512 |
| H | 4.125067  | -0.137648 | 0.696563  |
| C | 2.761687  | 0.461962  | -0.895840 |
| H | 2.710614  | 0.371213  | -1.985312 |
| H | 2.832056  | 1.534958  | -0.688224 |
| C | 1.485319  | -0.103790 | -0.265760 |
| H | 1.413279  | -1.176539 | -0.488434 |
| H | 1.552808  | -0.027703 | 0.827332  |
| C | 0.214839  | 0.604607  | -0.747786 |
| H | 0.140645  | 0.537006  | -1.839317 |
| H | 0.275957  | 1.671917  | -0.509785 |
| C | -1.049143 | 0.005277  | -0.136857 |
| H | -1.117673 | -1.056135 | -0.398755 |
| H | -1.043949 | 0.057606  | 0.953951  |
| O | 6.382663  | -0.255039 | -0.430649 |
| C | 7.673172  | 0.153576  | -0.966727 |
| C | 8.744329  | -0.526397 | -0.162979 |
| H | 7.713935  | -0.126012 | -2.020924 |
| H | 7.742911  | 1.240797  | -0.904209 |
| C | 9.236178  | 0.062661  | 1.005798  |
| C | 9.250120  | -1.767913 | -0.558740 |
| C | 10.214862 | -0.575103 | 1.764110  |
| H | 8.850232  | 1.027196  | 1.322591  |
| C | 10.229606 | -2.408840 | 0.196575  |
| H | 8.875003  | -2.234538 | -1.464974 |
| H | 10.590446 | -0.105630 | 2.667551  |
| C | 10.713686 | -1.812843 | 1.360034  |
| H | 10.616611 | -3.370787 | -0.123703 |
| H | 11.478859 | -2.309290 | 1.948067  |
| H | -3.543416 | -0.967994 | -0.891242 |



80 atoms

addition of another 3-isomer unit to the  $\epsilon$ -CL chain end,  
structure TS23, in toluene

|   |           |           |           |
|---|-----------|-----------|-----------|
| N | -4.615838 | -3.782253 | 0.250202  |
| C | -4.120325 | -2.498637 | 0.251365  |
| N | -3.967315 | -1.761330 | 1.314000  |
| C | -4.284582 | -2.346266 | 2.607991  |
| C | -5.466647 | -3.308742 | 2.519902  |
| C | -5.161382 | -4.373575 | 1.474104  |
| C | -3.974713 | -4.070010 | -2.133608 |
| C | -4.145827 | -2.559727 | -2.221847 |
| N | -3.715103 | -1.985065 | -0.959524 |
| C | -4.786350 | -4.594607 | -0.955753 |
| H | -4.504244 | -1.533697 | 3.306496  |
| H | -3.409814 | -2.875537 | 3.017510  |
| H | -6.362896 | -2.750427 | 2.230390  |
| H | -5.670724 | -3.785319 | 3.483194  |
| H | -4.451722 | -5.111997 | 1.871806  |
| H | -6.072682 | -4.920987 | 1.208390  |
| H | -4.489813 | -5.622611 | -0.718655 |
| H | -5.853377 | -4.627978 | -1.221185 |
| H | -2.914295 | -4.300449 | -1.995752 |
| H | -4.308180 | -4.559878 | -3.052125 |
| H | -5.192335 | -2.310577 | -2.457925 |
| H | -3.524515 | -2.139040 | -3.015196 |
| H | -3.609054 | -0.103144 | 1.330682  |
| O | -3.347871 | 0.872229  | 1.422248  |
| C | -3.235235 | 1.443256  | 0.192040  |
| O | -4.436116 | 1.176452  | -0.509476 |
| C | -4.669207 | 1.838591  | -1.760886 |
| H | -3.722131 | 2.107381  | -2.237254 |
| H | -5.157407 | 1.099401  | -2.401854 |
| C | -5.580843 | 3.043982  | -1.561961 |
| H | -6.476917 | 2.694589  | -1.036328 |
| H | -5.914196 | 3.403721  | -2.543433 |
| C | -4.935787 | 4.195682  | -0.783075 |
| H | -4.201380 | 4.701424  | -1.423474 |
| H | -5.705399 | 4.943822  | -0.562457 |
| C | -4.239355 | 3.796623  | 0.528203  |
| H | -4.928386 | 3.253489  | 1.182987  |
| H | -3.974059 | 4.718930  | 1.053598  |
| C | -2.952534 | 2.965581  | 0.335607  |
| H | -2.468667 | 3.280627  | -0.593312 |

|   |           |           |           |
|---|-----------|-----------|-----------|
| C | -1.948479 | 3.224640  | 1.487564  |
| H | -1.100621 | 2.539854  | 1.414260  |
| C | -1.431847 | 4.592069  | 1.501546  |
| H | -2.433913 | 2.998841  | 2.440861  |
| C | -0.998110 | 5.714563  | 1.500476  |
| H | -0.612701 | 6.706712  | 1.505309  |
| O | 5.336336  | 1.254928  | -1.928792 |
| O | -2.218068 | 0.810160  | -0.628472 |
| C | 5.290632  | 0.511487  | -0.977682 |
| C | 4.030821  | 0.035584  | -0.285273 |
| H | 3.993138  | -1.055624 | -0.386953 |
| H | 4.146006  | 0.220275  | 0.788197  |
| C | 2.756530  | 0.680504  | -0.827692 |
| H | 2.693988  | 0.505230  | -1.906325 |
| H | 2.819961  | 1.766936  | -0.705518 |
| C | 1.491426  | 0.154699  | -0.142557 |
| H | 1.432558  | -0.933860 | -0.272837 |
| H | 1.563210  | 0.324579  | 0.939665  |
| C | 0.210238  | 0.802011  | -0.678362 |
| H | 0.139607  | 0.645820  | -1.761023 |
| H | 0.249020  | 1.887020  | -0.527337 |
| C | -1.048175 | 0.242547  | -0.023931 |
| H | -1.096906 | -0.842822 | -0.169426 |
| H | -1.058361 | 0.415670  | 1.053384  |
| O | 6.387797  | -0.014803 | -0.393377 |
| C | 7.665762  | 0.360190  | -0.981732 |
| C | 8.753190  | -0.316988 | -0.197807 |
| H | 7.666233  | 0.054390  | -2.029411 |
| H | 7.754567  | 1.447296  | -0.948857 |
| C | 9.328369  | 0.313074  | 0.909646  |
| C | 9.191911  | -1.596568 | -0.551011 |
| C | 10.323471 | -0.321316 | 1.649627  |
| H | 8.995008  | 1.307139  | 1.193051  |
| C | 10.186584 | -2.234450 | 0.186374  |
| H | 8.752080  | -2.095157 | -1.409906 |
| H | 10.764172 | 0.180355  | 2.505061  |
| C | 10.754440 | -1.597034 | 1.288649  |
| H | 10.520746 | -3.226317 | -0.100406 |
| H | 11.531988 | -2.091249 | 1.862150  |
| H | -3.520264 | -0.990991 | -0.939358 |

80 atoms

addition of another 3-isomer unit to the  $\epsilon$ -CL chain end,  
structure I3, in toluene

|   |           |           |           |
|---|-----------|-----------|-----------|
| N | -2.746074 | -4.264437 | 0.380183  |
| C | -2.925817 | -2.908540 | 0.238026  |
| N | -2.787969 | -2.033098 | 1.192901  |
| C | -2.353164 | -2.504880 | 2.498627  |
| C | -2.914698 | -3.889262 | 2.815896  |
| C | -2.520335 | -4.852352 | 1.702782  |
| C | -2.885592 | -4.575774 | -2.081243 |
| C | -3.744058 | -3.317776 | -2.059542 |
| N | -3.233052 | -2.443957 | -1.018862 |
| C | -2.923333 | -5.230172 | -0.705590 |
| H | -2.676049 | -1.778313 | 3.249625  |
| H | -1.253384 | -2.534859 | 2.552510  |
| H | -4.005804 | -3.827019 | 2.883202  |
| H | -2.545489 | -4.263602 | 3.775185  |
| H | -1.464897 | -5.141437 | 1.799412  |
| H | -3.108859 | -5.774258 | 1.768431  |
| H | -2.132959 | -5.984654 | -0.623233 |
| H | -3.878475 | -5.758265 | -0.567804 |
| H | -1.859233 | -4.301129 | -2.341476 |
| H | -3.243913 | -5.285639 | -2.831287 |
| H | -4.800904 | -3.583984 | -1.900275 |
| H | -3.683878 | -2.786512 | -3.011957 |
| H | -3.330705 | -0.413341 | 1.113308  |
| O | -3.694779 | 0.518049  | 1.249864  |
| C | -3.556821 | 1.328180  | 0.157032  |
| O | -3.808599 | 0.499248  | -0.990904 |
| C | -3.977656 | 1.138162  | -2.263599 |
| H | -3.434165 | 2.086918  | -2.283012 |
| H | -3.503265 | 0.479847  | -2.997181 |
| C | -5.459863 | 1.307065  | -2.583348 |
| H | -5.933211 | 0.323106  | -2.484006 |
| H | -5.562594 | 1.595793  | -3.636819 |
| C | -6.190904 | 2.326349  | -1.700117 |
| H | -5.893056 | 3.340473  | -1.995920 |
| H | -7.264778 | 2.258229  | -1.907076 |
| C | -5.962332 | 2.181020  | -0.186017 |
| H | -6.217978 | 1.171360  | 0.151986  |
| H | -6.654074 | 2.861468  | 0.319540  |
| C | -4.530618 | 2.526769  | 0.261956  |
| H | -4.134338 | 3.306367  | -0.394766 |
| C | -4.481190 | 3.089149  | 1.703890  |
| H | -3.435792 | 3.183206  | 2.009937  |

|   |           |           |           |
|---|-----------|-----------|-----------|
| C | -5.137364 | 4.387712  | 1.837297  |
| H | -4.938014 | 2.368826  | 2.387730  |
| C | -5.673394 | 5.460524  | 1.938741  |
| H | -6.143456 | 6.410452  | 2.035952  |
| O | 5.276569  | 2.822037  | -0.793981 |
| O | -2.269911 | 1.913358  | 0.033820  |
| C | 5.200400  | 1.675808  | -0.420609 |
| C | 3.920567  | 0.923255  | -0.123452 |
| H | 3.894919  | 0.044131  | -0.777870 |
| H | 3.998057  | 0.521769  | 0.893108  |
| C | 2.659501  | 1.769554  | -0.289038 |
| H | 2.621231  | 2.167740  | -1.308111 |
| H | 2.719451  | 2.642156  | 0.369667  |
| C | 1.381022  | 0.980972  | 0.010600  |
| H | 1.325808  | 0.109309  | -0.654540 |
| H | 1.431618  | 0.578634  | 1.030612  |
| C | 0.109603  | 1.821592  | -0.141640 |
| H | 0.046094  | 2.223952  | -1.159118 |
| H | 0.149891  | 2.685582  | 0.531308  |
| C | -1.153197 | 1.028463  | 0.157525  |
| H | -1.261126 | 0.190186  | -0.539492 |
| H | -1.121206 | 0.616043  | 1.171194  |
| O | 6.277880  | 0.888705  | -0.214712 |
| C | 7.573904  | 1.501549  | -0.468490 |
| C | 8.635264  | 0.483732  | -0.162773 |
| H | 7.605940  | 1.824638  | -1.510379 |
| H | 7.663943  | 2.388272  | 0.161347  |
| C | 9.116041  | 0.330851  | 1.141384  |
| C | 9.143785  | -0.339498 | -1.171291 |
| C | 10.085840 | -0.625126 | 1.432535  |
| H | 8.728254  | 0.965829  | 1.932633  |
| C | 10.115029 | -1.296358 | -0.884392 |
| H | 8.777897  | -0.229300 | -2.187975 |
| H | 10.452974 | -0.731305 | 2.448229  |
| C | 10.587638 | -1.440725 | 0.418869  |
| H | 10.504359 | -1.926442 | -1.677555 |
| H | 11.346365 | -2.183414 | 0.643579  |
| H | -3.494370 | -1.463003 | -1.034997 |

80 atoms

addition of another 3-isomer unit to the  $\epsilon$ -CL chain end,  
structure TS3r, in toluene

|   |           |          |           |
|---|-----------|----------|-----------|
| N | -4.308161 | 4.003688 | -0.396760 |
|---|-----------|----------|-----------|

|   |           |           |           |
|---|-----------|-----------|-----------|
| C | -3.938566 | 2.685990  | -0.261920 |
| N | -4.120862 | 1.762510  | -1.160790 |
| C | -4.710653 | 2.145931  | -2.434281 |
| C | -5.734511 | 3.267088  | -2.271248 |
| C | -5.075001 | 4.444775  | -1.563886 |
| C | -3.067737 | 4.599015  | 1.670136  |
| C | -3.330731 | 3.158837  | 2.089181  |
| N | -3.288298 | 2.328834  | 0.898218  |
| C | -4.108951 | 5.017846  | 0.639521  |
| H | -5.177900 | 1.260563  | -2.874666 |
| H | -3.928392 | 2.463375  | -3.141323 |
| H | -6.576594 | 2.901795  | -1.673947 |
| H | -6.131591 | 3.591761  | -3.237440 |
| H | -4.415219 | 4.988484  | -2.253796 |
| H | -5.832771 | 5.157895  | -1.220905 |
| H | -3.803077 | 5.949109  | 0.149994  |
| H | -5.068366 | 5.223673  | 1.137098  |
| H | -2.063537 | 4.667117  | 1.241751  |
| H | -3.113316 | 5.273799  | 2.528863  |
| H | -4.297109 | 3.090079  | 2.613873  |
| H | -2.561027 | 2.806021  | 2.779370  |
| H | -3.527684 | 0.166759  | -1.058135 |
| O | -3.189492 | -0.770942 | -1.215011 |
| C | -3.058724 | -1.530364 | -0.079497 |
| O | -3.373172 | -0.666541 | 1.021211  |
| C | -3.581006 | -1.253995 | 2.313360  |
| H | -3.005464 | -2.179556 | 2.403330  |
| H | -3.163715 | -0.544688 | 3.033699  |
| C | -5.069142 | -1.460393 | 2.579008  |
| H | -5.570162 | -0.501996 | 2.399684  |
| H | -5.207781 | -1.689554 | 3.642901  |
| C | -5.723423 | -2.556817 | 1.729282  |
| H | -5.405576 | -3.539807 | 2.099656  |
| H | -6.807659 | -2.515694 | 1.882064  |
| C | -5.425022 | -2.491462 | 0.222356  |
| H | -5.707277 | -1.515165 | -0.187062 |
| H | -6.060520 | -3.230353 | -0.274708 |
| C | -3.957762 | -2.793004 | -0.132278 |
| H | -3.554530 | -3.504665 | 0.594039  |
| C | -3.810921 | -3.445967 | -1.528473 |
| H | -2.748124 | -3.511848 | -1.776886 |
| C | -4.403794 | -4.778856 | -1.605934 |
| H | -4.261697 | -2.791908 | -2.279630 |
| C | -4.888236 | -5.879227 | -1.662146 |

|   |           |           |           |
|---|-----------|-----------|-----------|
| H | -5.311738 | -6.854040 | -1.718194 |
| O | 5.848401  | -2.420659 | 0.823357  |
| O | -1.742423 | -2.025760 | 0.065009  |
| C | 5.699572  | -1.299923 | 0.397876  |
| C | 4.372346  | -0.630841 | 0.108433  |
| H | 4.298084  | 0.246789  | 0.761687  |
| H | 4.413495  | -0.228410 | -0.909468 |
| C | 3.169654  | -1.554730 | 0.292468  |
| H | 3.174242  | -1.956628 | 1.310637  |
| H | 3.273835  | -2.420499 | -0.369956 |
| C | 1.837966  | -0.849796 | 0.017237  |
| H | 1.736804  | 0.012668  | 0.689184  |
| H | 1.844874  | -0.439455 | -1.000730 |
| C | 0.628152  | -1.774324 | 0.184863  |
| H | 0.611301  | -2.188591 | 1.199491  |
| H | 0.714335  | -2.628106 | -0.496652 |
| C | -0.690761 | -1.066575 | -0.084358 |
| H | -0.838330 | -0.239824 | 0.620692  |
| H | -0.717053 | -0.650860 | -1.095545 |
| O | 6.726395  | -0.468130 | 0.121519  |
| C | 8.060314  | -0.995305 | 0.371754  |
| C | 9.055185  | 0.064660  | -0.005871 |
| H | 8.132013  | -1.266210 | 1.426556  |
| H | 8.187932  | -1.904394 | -0.218226 |
| C | 9.554777  | 0.137143  | -1.309542 |
| C | 9.480291  | 1.007919  | 0.934304  |
| C | 10.462100 | 1.131433  | -1.667692 |
| H | 9.231545  | -0.590821 | -2.047927 |
| C | 10.387567 | 2.003759  | 0.580232  |
| H | 9.099010  | 0.960853  | 1.950237  |
| H | 10.844931 | 1.174319  | -2.682222 |
| C | 10.880280 | 2.066933  | -0.722391 |
| H | 10.712293 | 2.727727  | 1.320591  |
| H | 11.589855 | 2.840112  | -0.998880 |
| H | -3.224338 | 1.322722  | 1.014572  |

80 atoms

addition of another 3-isomer unit to the  $\epsilon$ -CL chain end,  
structure I3r, in toluene

|   |           |          |           |
|---|-----------|----------|-----------|
| N | -5.831963 | 3.220074 | -0.517634 |
| C | -4.963319 | 2.167029 | -0.354598 |
| N | -4.897570 | 1.125355 | -1.137809 |
| C | -5.756581 | 1.093830 | -2.311284 |

|   |           |           |           |
|---|-----------|-----------|-----------|
| C | -7.105484 | 1.758520  | -2.045412 |
| C | -6.870271 | 3.179821  | -1.549508 |
| C | -4.604755 | 4.537424  | 1.190006  |
| C | -4.221107 | 3.186959  | 1.780179  |
| N | -4.077894 | 2.238777  | 0.691495  |
| C | -5.880915 | 4.380600  | 0.372710  |
| H | -5.897139 | 0.049951  | -2.606717 |
| H | -5.265832 | 1.589742  | -3.163382 |
| H | -7.646002 | 1.185652  | -1.284552 |
| H | -7.726884 | 1.779940  | -2.945402 |
| H | -6.585272 | 3.836513  | -2.382862 |
| H | -7.790167 | 3.592479  | -1.120424 |
| H | -6.048191 | 5.272205  | -0.241526 |
| H | -6.748862 | 4.291442  | 1.042813  |
| H | -3.790173 | 4.893213  | 0.552462  |
| H | -4.764486 | 5.279155  | 1.976870  |
| H | -4.979354 | 2.868686  | 2.513267  |
| H | -3.266549 | 3.247324  | 2.307630  |
| H | -3.571013 | 0.050644  | -1.055141 |
| O | -2.741900 | -0.522008 | -1.103322 |
| C | -2.582458 | -1.322338 | 0.000865  |
| O | -2.820367 | -0.467179 | 1.136246  |
| C | -2.921163 | -1.067286 | 2.434899  |
| H | -2.332061 | -1.988398 | 2.469671  |
| H | -2.453826 | -0.360429 | 3.126073  |
| C | -4.379636 | -1.296296 | 2.821354  |
| H | -4.908503 | -0.344449 | 2.694412  |
| H | -4.425784 | -1.536280 | 3.890918  |
| C | -5.087417 | -2.395193 | 2.019536  |
| H | -4.719979 | -3.375875 | 2.348163  |
| H | -6.154439 | -2.376653 | 2.268531  |
| C | -4.926930 | -2.307043 | 0.492794  |
| H | -5.265944 | -1.332591 | 0.124632  |
| H | -5.589769 | -3.054906 | 0.046874  |
| C | -3.492648 | -2.582806 | 0.004299  |
| H | -3.024397 | -3.303756 | 0.681025  |
| C | -3.461574 | -3.214048 | -1.409355 |
| H | -2.424842 | -3.253841 | -1.753951 |
| C | -4.034311 | -4.557381 | -1.453426 |
| H | -3.990859 | -2.562553 | -2.110687 |
| C | -4.502793 | -5.665623 | -1.483749 |
| H | -4.911307 | -6.647891 | -1.516114 |
| O | 6.322607  | -2.103646 | 0.854754  |
| O | -1.270133 | -1.819778 | 0.038027  |

|   |           |           |           |
|---|-----------|-----------|-----------|
| C | 6.164592  | -1.007373 | 0.372587  |
| C | 4.833274  | -0.374350 | 0.026548  |
| H | 4.745679  | 0.548532  | 0.611954  |
| H | 4.878975  | -0.047869 | -1.018199 |
| C | 3.637449  | -1.293753 | 0.268401  |
| H | 3.636698  | -1.619706 | 1.313456  |
| H | 3.754607  | -2.204736 | -0.327784 |
| C | 2.302348  | -0.622616 | -0.068024 |
| H | 2.189978  | 0.287547  | 0.535730  |
| H | 2.313521  | -0.290515 | -1.114114 |
| C | 1.097708  | -1.540605 | 0.161643  |
| H | 1.078026  | -1.879204 | 1.203909  |
| H | 1.192852  | -2.441641 | -0.454989 |
| C | -0.223004 | -0.860966 | -0.164817 |
| H | -0.388000 | 0.006111  | 0.483150  |
| H | -0.242171 | -0.513309 | -1.201287 |
| O | 7.183584  | -0.173799 | 0.073404  |
| C | 8.520789  | -0.667721 | 0.369338  |
| C | 9.505551  | 0.390862  | -0.037528 |
| H | 8.578017  | -0.891003 | 1.436085  |
| H | 8.672991  | -1.599526 | -0.177871 |
| C | 10.022208 | 0.418334  | -1.336278 |
| C | 9.903544  | 1.377610  | 0.869248  |
| C | 10.919782 | 1.411053  | -1.722181 |
| H | 9.719906  | -0.343556 | -2.048861 |
| C | 10.801116 | 2.372002  | 0.487389  |
| H | 9.508550  | 1.365896  | 1.880938  |
| H | 11.316016 | 1.418964  | -2.732427 |
| C | 11.310989 | 2.390122  | -0.809993 |
| H | 11.104711 | 3.130090  | 1.202124  |
| H | 12.012893 | 3.162271  | -1.108095 |
| H | -3.559875 | 1.381555  | 0.854593  |

80 atoms

addition of another 3-isomer unit to the  $\epsilon$ -CL chain end,  
structure TS34, in toluene

|   |           |          |           |
|---|-----------|----------|-----------|
| N | -4.577252 | 3.826574 | -0.324017 |
| C | -4.186024 | 2.533885 | -0.189045 |
| N | -4.400614 | 1.657815 | -1.186459 |
| C | -4.912955 | 2.057492 | -2.488675 |
| C | -5.919003 | 3.184427 | -2.303476 |
| C | -5.266867 | 4.318617 | -1.522911 |
| C | -3.148193 | 4.393324 | 1.610202  |



|   |           |           |           |
|---|-----------|-----------|-----------|
| C | -3.365634 | 2.957766  | 2.069894  |
| N | -3.595925 | 2.096831  | 0.919287  |
| C | -4.311159 | 4.819690  | 0.723174  |
| H | -5.375985 | 1.182353  | -2.946771 |
| H | -4.096384 | 2.378386  | -3.149325 |
| H | -6.790847 | 2.809101  | -1.759710 |
| H | -6.264496 | 3.557774  | -3.270112 |
| H | -4.552611 | 4.861612  | -2.155202 |
| H | -6.022068 | 5.039564  | -1.197010 |
| H | -4.085163 | 5.768051  | 0.227846  |
| H | -5.218958 | 4.974203  | 1.320322  |
| H | -2.210759 | 4.460647  | 1.049841  |
| H | -3.072764 | 5.067873  | 2.466262  |
| H | -4.212593 | 2.907172  | 2.767209  |
| H | -2.490426 | 2.576062  | 2.598960  |
| H | -3.942489 | 0.737694  | -1.123282 |
| O | -3.048258 | -0.753654 | -1.314009 |
| C | -2.877067 | -1.602881 | -0.429215 |
| O | -3.164116 | -0.456126 | 1.221950  |
| C | -3.554065 | -0.997651 | 2.441618  |
| H | -3.059480 | -1.971654 | 2.618085  |
| H | -3.222359 | -0.352483 | 3.279398  |
| C | -5.077063 | -1.174630 | 2.558047  |
| H | -5.540302 | -0.207820 | 2.319290  |
| H | -5.344231 | -1.396357 | 3.601457  |
| C | -5.681466 | -2.262770 | 1.660219  |
| H | -5.407028 | -3.250194 | 2.054616  |
| H | -6.774389 | -2.208874 | 1.742934  |
| C | -5.309520 | -2.221976 | 0.166786  |
| H | -5.439013 | -1.213717 | -0.235978 |
| H | -6.025814 | -2.860020 | -0.361506 |
| C | -3.886871 | -2.718797 | -0.157975 |
| H | -3.504457 | -3.317601 | 0.671043  |
| C | -3.865492 | -3.622210 | -1.427176 |
| H | -2.827048 | -3.857232 | -1.681743 |
| C | -4.607167 | -4.870066 | -1.271285 |
| H | -4.269403 | -3.052258 | -2.270803 |
| C | -5.215392 | -5.899432 | -1.133314 |
| H | -5.747873 | -6.813000 | -1.012652 |
| O | 5.951061  | -2.329000 | 0.940469  |
| O | -1.622520 | -2.049188 | -0.115166 |
| C | 5.808543  | -1.257424 | 0.401716  |
| C | 4.491351  | -0.651367 | -0.034424 |
| H | 4.390905  | 0.317998  | 0.467326  |

|   |           |           |           |
|---|-----------|-----------|-----------|
| H | 4.571479  | -0.414875 | -1.101495 |
| C | 3.282882  | -1.543456 | 0.244083  |
| H | 3.238247  | -1.770511 | 1.314118  |
| H | 3.419292  | -2.506113 | -0.259432 |
| C | 1.966263  | -0.903896 | -0.207042 |
| H | 1.835466  | 0.059692  | 0.302701  |
| H | 2.022148  | -0.672692 | -1.278901 |
| C | 0.746012  | -1.790562 | 0.059906  |
| H | 0.675627  | -2.019766 | 1.128927  |
| H | 0.862314  | -2.750105 | -0.457207 |
| C | -0.550871 | -1.139608 | -0.391589 |
| H | -0.745595 | -0.211368 | 0.152382  |
| H | -0.531748 | -0.910428 | -1.461315 |
| O | 6.835855  | -0.431294 | 0.108313  |
| C | 8.161625  | -0.904310 | 0.479443  |
| C | 9.158700  | 0.137716  | 0.059821  |
| H | 8.178480  | -1.075435 | 1.557143  |
| H | 8.337256  | -1.860842 | -0.015697 |
| C | 9.705666  | 0.118921  | -1.226755 |
| C | 9.538340  | 1.154476  | 0.940760  |
| C | 10.614808 | 1.095638  | -1.625766 |
| H | 9.417886  | -0.666788 | -1.919196 |
| C | 10.447818 | 2.133000  | 0.545787  |
| H | 9.119829  | 1.178767  | 1.942717  |
| H | 11.034688 | 1.067502  | -2.626065 |
| C | 10.987730 | 2.104979  | -0.739095 |
| H | 10.737121 | 2.914608  | 1.240854  |
| H | 11.698915 | 2.864593  | -1.047263 |
| H | -3.414594 | 1.028660  | 1.030843  |

80 atoms

addition of another 3-isomer unit to the  $\epsilon$ -CL chain end,  
structure I4, in toluene

|   |           |          |           |
|---|-----------|----------|-----------|
| N | -2.019999 | 4.115389 | -0.066782 |
| C | -2.498047 | 2.826020 | -0.012397 |
| N | -3.226293 | 2.383650 | -1.091890 |
| C | -3.202421 | 3.062341 | -2.375499 |
| C | -3.338405 | 4.557519 | -2.124169 |
| C | -2.209306 | 5.012440 | -1.208277 |
| C | -0.555609 | 3.508374 | 1.824615  |
| C | -1.659839 | 2.515246 | 2.178238  |
| N | -2.340293 | 2.011738 | 0.993998  |
| C | -1.153337 | 4.635949 | 0.992628  |

|   |           |           |           |
|---|-----------|-----------|-----------|
| H | -4.034393 | 2.684923  | -2.973256 |
| H | -2.277484 | 2.857348  | -2.937641 |
| H | -4.307391 | 4.754188  | -1.656245 |
| H | -3.297154 | 5.120077  | -3.060479 |
| H | -1.269475 | 5.081595  | -1.776041 |
| H | -2.416414 | 6.016204  | -0.820630 |
| H | -0.359840 | 5.226251  | 0.520839  |
| H | -1.724682 | 5.324023  | 1.630737  |
| H | 0.221691  | 2.995285  | 1.248140  |
| H | -0.082970 | 3.920727  | 2.720911  |
| H | -2.377389 | 2.998690  | 2.860259  |
| H | -1.250700 | 1.661813  | 2.726337  |
| H | -3.394346 | 1.384156  | -1.099465 |
| O | -3.789292 | -0.548407 | -1.412716 |
| C | -3.650009 | -1.515484 | -0.690981 |
| O | -3.921367 | -0.167971 | 1.741466  |
| C | -5.165860 | 0.398734  | 2.115894  |
| H | -5.525229 | -0.146430 | 2.998383  |
| H | -5.024148 | 1.444589  | 2.421830  |
| C | -6.243347 | 0.350030  | 1.027442  |
| H | -5.866943 | 0.842996  | 0.124494  |
| H | -7.074826 | 0.970313  | 1.388045  |
| C | -6.807670 | -1.045647 | 0.687048  |
| H | -6.812848 | -1.664898 | 1.593873  |
| H | -7.862537 | -0.922052 | 0.415904  |
| C | -6.167882 | -1.844558 | -0.462787 |
| H | -6.137876 | -1.228799 | -1.366668 |
| H | -6.845772 | -2.675712 | -0.679946 |
| C | -4.768787 | -2.436183 | -0.221033 |
| H | -4.597646 | -2.595511 | 0.845426  |
| C | -4.588479 | -3.809884 | -0.937333 |
| H | -3.549120 | -4.133376 | -0.838306 |
| C | -5.461881 | -4.853679 | -0.408866 |
| H | -4.778402 | -3.687259 | -2.010538 |
| C | -6.176981 | -5.712146 | 0.036597  |
| H | -6.805826 | -6.475209 | 0.430703  |
| O | 5.049192  | -2.939092 | 0.766967  |
| O | -2.456371 | -1.957991 | -0.277267 |
| C | 5.011882  | -1.840702 | 0.265978  |
| C | 3.764936  | -1.129343 | -0.216598 |
| H | 3.755934  | -0.128162 | 0.227626  |
| H | 3.877716  | -0.965123 | -1.294877 |
| C | 2.473628  | -1.885709 | 0.090297  |
| H | 2.388102  | -2.033560 | 1.171862  |

|   |           |           |           |
|---|-----------|-----------|-----------|
| H | 2.529268  | -2.888700 | -0.344291 |
| C | 1.230205  | -1.159825 | -0.432349 |
| H | 1.184254  | -0.153038 | 0.001913  |
| H | 1.320057  | -1.018345 | -1.517317 |
| C | -0.069224 | -1.908990 | -0.118614 |
| H | -0.173920 | -2.039483 | 0.963601  |
| H | -0.035480 | -2.913922 | -0.554200 |
| C | -1.291414 | -1.177539 | -0.643537 |
| H | -1.392568 | -0.184068 | -0.200578 |
| H | -1.267745 | -1.071284 | -1.731383 |
| O | 6.107514  | -1.080903 | 0.057079  |
| C | 7.378140  | -1.665605 | 0.462896  |
| C | 8.463980  | -0.677842 | 0.145068  |
| H | 7.330071  | -1.891129 | 1.529413  |
| H | 7.510606  | -2.606369 | -0.074406 |
| C | 9.039341  | -0.642284 | -1.128896 |
| C | 8.900810  | 0.234319  | 1.109702  |
| C | 10.031907 | 0.285735  | -1.433414 |
| H | 8.707809  | -1.347274 | -1.885702 |
| C | 9.894523  | 1.163598  | 0.809427  |
| H | 8.461120  | 0.215447  | 2.102647  |
| H | 10.472859 | 0.300554  | -2.424888 |
| C | 10.461612 | 1.190825  | -0.463501 |
| H | 10.227582 | 1.863628  | 1.568830  |
| H | 11.237946 | 1.911924  | -0.698114 |
| H | -3.348005 | 0.560198  | 1.396219  |

80 atoms

addition of another 3-isomer unit to the  $\epsilon$ -CL chain end,  
structure I5, in toluene

|   |            |           |           |
|---|------------|-----------|-----------|
| N | -9.428564  | -1.437964 | -0.107887 |
| C | -8.073859  | -1.642601 | 0.019758  |
| N | -7.547765  | -1.565323 | 1.292074  |
| C | -8.376786  | -1.681232 | 2.478259  |
| C | -9.598864  | -0.793326 | 2.285680  |
| C | -10.334235 | -1.222386 | 1.021955  |
| C | -9.212460  | -2.389843 | -2.375360 |
| C | -7.784509  | -1.849706 | -2.318735 |
| N | -7.251148  | -1.862484 | -0.966201 |
| C | -10.083194 | -1.597116 | -1.408198 |
| H | -7.787735  | -1.356407 | 3.338509  |
| H | -8.689910  | -2.719754 | 2.669643  |
| H | -9.272311  | 0.247018  | 2.198358  |

|   |            |           |           |
|---|------------|-----------|-----------|
| H | -10.275677 | -0.862460 | 3.141283  |
| H | -10.901395 | -2.145502 | 1.213621  |
| H | -11.065258 | -0.459463 | 0.731639  |
| H | -11.037985 | -2.109525 | -1.246174 |
| H | -10.319863 | -0.608250 | -1.824416 |
| H | -9.208368  | -3.446331 | -2.087172 |
| H | -9.628168  | -2.324682 | -3.385245 |
| H | -7.764143  | -0.829007 | -2.732939 |
| H | -7.125554  | -2.448636 | -2.954257 |
| H | -6.584987  | -1.879118 | 1.344544  |
| O | -0.659790  | 2.992152  | 1.826490  |
| C | -0.712727  | 2.792770  | 0.635037  |
| O | -4.878595  | -2.522093 | 0.282021  |
| C | -3.769478  | -1.691146 | -0.026210 |
| H | -2.943096  | -2.027934 | 0.608568  |
| H | -3.453930  | -1.844059 | -1.069550 |
| C | -4.037139  | -0.203625 | 0.214306  |
| H | -4.336930  | -0.066336 | 1.260226  |
| H | -4.894452  | 0.102969  | -0.395958 |
| C | -2.826196  | 0.679844  | -0.101883 |
| H | -1.971757  | 0.350436  | 0.502260  |
| H | -2.529005  | 0.537085  | -1.148530 |
| C | -3.096224  | 2.167259  | 0.149099  |
| H | -3.345291  | 2.325731  | 1.204200  |
| H | -3.975230  | 2.475320  | -0.428697 |
| C | -1.927679  | 3.099682  | -0.229780 |
| H | -1.654175  | 2.934210  | -1.274294 |
| C | -2.333083  | 4.581764  | -0.041647 |
| H | -2.523309  | 4.762237  | 1.021031  |
| C | -1.332578  | 5.529529  | -0.526788 |
| H | -3.278778  | 4.755202  | -0.565691 |
| C | -0.498347  | 6.293358  | -0.934990 |
| H | 0.236260   | 6.975805  | -1.292381 |
| O | 7.044608   | -0.656064 | -2.149894 |
| O | 0.291207   | 2.255603  | -0.078195 |
| C | 7.209064   | -0.476696 | -0.966649 |
| C | 6.179174   | 0.076130  | -0.003640 |
| H | 6.028385   | -0.670477 | 0.784491  |
| H | 6.624279   | 0.940855  | 0.501031  |
| C | 4.856770   | 0.445889  | -0.672812 |
| H | 4.448410   | -0.434281 | -1.179595 |
| H | 5.042476   | 1.184070  | -1.459782 |
| C | 3.830444   | 0.995992  | 0.322200  |
| H | 3.646970   | 0.251160  | 1.107071  |

|   |           |           |           |
|---|-----------|-----------|-----------|
| H | 4.248423  | 1.874455  | 0.830201  |
| C | 2.503711  | 1.374759  | -0.344673 |
| H | 2.073077  | 0.500647  | -0.845138 |
| H | 2.676540  | 2.127195  | -1.121671 |
| C | 1.498006  | 1.919998  | 0.652334  |
| H | 1.246921  | 1.188091  | 1.424194  |
| H | 1.862415  | 2.820425  | 1.152241  |
| O | 8.363118  | -0.754110 | -0.325363 |
| C | 9.436819  | -1.297387 | -1.145907 |
| C | 10.623159 | -1.535195 | -0.256142 |
| H | 9.083035  | -2.218869 | -1.611188 |
| H | 9.657951  | -0.582539 | -1.940356 |
| C | 11.551485 | -0.515861 | -0.023831 |
| C | 10.804904 | -2.771048 | 0.371150  |
| C | 12.640799 | -0.726677 | 0.817948  |
| H | 11.419990 | 0.448205  | -0.506485 |
| C | 11.893483 | -2.986159 | 1.213360  |
| H | 10.089838 | -3.569939 | 0.197758  |
| H | 13.355996 | 0.071715  | 0.987416  |
| C | 12.813536 | -1.963367 | 1.438263  |
| H | 12.024980 | -3.951425 | 1.691502  |
| H | 13.663738 | -2.130230 | 2.091742  |
| H | -5.618401 | -2.332748 | -0.350997 |

80 atoms

addition of another 7-isomer unit to the  $\epsilon$ -CL chain end,  
structure I1, in toluene

|   |          |          |           |
|---|----------|----------|-----------|
| O | 3.109445 | 0.768452 | -2.509298 |
| O | 4.242105 | 1.689554 | -0.875111 |
| C | 3.188288 | 1.681417 | -1.714345 |
| C | 2.203687 | 2.828604 | -1.674875 |
| H | 1.640170 | 2.757663 | -0.739280 |
| H | 1.499974 | 2.639961 | -2.485963 |
| C | 2.832509 | 4.228594 | -1.822696 |
| H | 3.564860 | 4.219496 | -2.638556 |
| H | 2.040578 | 4.914905 | -2.137798 |
| C | 3.472448 | 4.780111 | -0.543804 |
| H | 2.699015 | 4.864978 | 0.229842  |
| H | 3.822906 | 5.800041 | -0.734507 |
| C | 4.637603 | 3.953427 | 0.010074  |
| H | 5.478790 | 3.949959 | -0.693689 |
| H | 4.999841 | 4.426033 | 0.928252  |
| C | 4.283310 | 2.504292 | 0.331365  |

|   |           |           |           |
|---|-----------|-----------|-----------|
| H | 3.311794  | 2.423854  | 0.823057  |
| C | 5.332128  | 1.786690  | 1.197836  |
| H | 5.052574  | 0.729029  | 1.241276  |
| C | 5.436643  | 2.334524  | 2.546080  |
| H | 6.304948  | 1.838583  | 0.695445  |
| C | 5.514502  | 2.784705  | 3.658684  |
| H | 5.582829  | 3.177258  | 4.645778  |
| N | 4.969988  | -3.483407 | 0.084762  |
| C | 4.384694  | -2.253501 | -0.128238 |
| N | 4.493130  | -1.728703 | -1.386345 |
| C | 4.930995  | -2.493861 | -2.536786 |
| C | 6.112567  | -3.357956 | -2.116396 |
| C | 5.690590  | -4.234322 | -0.944073 |
| C | 3.637549  | -3.604680 | 2.162618  |
| C | 3.773437  | -2.083834 | 2.147288  |
| N | 3.771529  | -1.556054 | 0.790620  |
| C | 4.771292  | -4.206626 | 1.342416  |
| H | 5.212953  | -1.789098 | -3.321225 |
| H | 4.126605  | -3.126903 | -2.942902 |
| H | 6.944152  | -2.709888 | -1.824232 |
| H | 6.452824  | -3.990933 | -2.940314 |
| H | 5.057682  | -5.059975 | -1.302541 |
| H | 6.569345  | -4.693536 | -0.476671 |
| H | 4.556937  | -5.254940 | 1.102686  |
| H | 5.707166  | -4.198793 | 1.918086  |
| H | 2.672809  | -3.883484 | 1.725876  |
| H | 3.667110  | -4.004617 | 3.180616  |
| H | 4.695341  | -1.796952 | 2.678429  |
| H | 2.950101  | -1.615892 | 2.694368  |
| H | 4.027165  | -0.845155 | -1.553125 |
| O | -5.694828 | 2.004393  | 0.888158  |
| O | 1.784168  | 0.367932  | 0.618200  |
| C | -5.699832 | 0.879180  | 0.448424  |
| C | -4.475955 | 0.050388  | 0.120130  |
| H | -4.497983 | -0.153331 | -0.957210 |
| H | -4.592768 | -0.927515 | 0.599467  |
| C | -3.160864 | 0.714778  | 0.524156  |
| H | -3.092191 | 1.698688  | 0.049223  |
| H | -3.167596 | 0.904730  | 1.602778  |
| C | -1.936035 | -0.127551 | 0.154668  |
| H | -1.931680 | -0.307523 | -0.928460 |
| H | -2.018960 | -1.116938 | 0.623617  |
| C | -0.613613 | 0.523361  | 0.569540  |
| H | -0.530829 | 1.516149  | 0.110769  |

|   |            |           |           |
|---|------------|-----------|-----------|
| H | -0.595622  | 0.682610  | 1.654033  |
| C | 0.609569   | -0.298205 | 0.184466  |
| H | 0.627770   | -0.449962 | -0.906400 |
| H | 0.540740   | -1.295632 | 0.644224  |
| O | -6.830885  | 0.193701  | 0.176578  |
| C | -8.080253  | 0.895371  | 0.433744  |
| C | -9.210972  | -0.026181 | 0.076028  |
| H | -8.092116  | 1.808367  | -0.164225 |
| H | -8.104988  | 1.182371  | 1.486274  |
| C | -9.769951  | -0.871683 | 1.038641  |
| C | -9.707300  | -0.067772 | -1.230375 |
| C | -10.805855 | -1.741027 | 0.704387  |
| H | -9.391795  | -0.847669 | 2.056534  |
| C | -10.742488 | -0.935866 | -1.568814 |
| H | -9.280404  | 0.584952  | -1.986276 |
| H | -11.233433 | -2.389593 | 1.462169  |
| C | -11.293990 | -1.774351 | -0.600917 |
| H | -11.120947 | -0.955979 | -2.585700 |
| H | -12.103063 | -2.448759 | -0.862309 |
| H | 2.536600   | -0.279824 | 0.601765  |

80 atoms

addition of another 7-isomer unit to the  $\epsilon$ -CL chain end,  
structure TS12, in toluene

|   |          |          |           |
|---|----------|----------|-----------|
| O | 3.115029 | 0.476441 | -2.279345 |
| O | 4.170217 | 1.458345 | -0.594960 |
| C | 3.020338 | 1.317056 | -1.368140 |
| C | 2.198903 | 2.586963 | -1.594529 |
| H | 1.660070 | 2.869145 | -0.690127 |
| H | 1.453434 | 2.324740 | -2.346908 |
| C | 3.053437 | 3.775138 | -2.078167 |
| H | 3.810941 | 3.426896 | -2.789698 |
| H | 2.408337 | 4.464063 | -2.634215 |
| C | 3.709214 | 4.555920 | -0.930020 |
| H | 2.915519 | 4.927921 | -0.268917 |
| H | 4.205185 | 5.445900 | -1.334311 |
| C | 4.726865 | 3.772665 | -0.090601 |
| H | 5.622130 | 3.559419 | -0.687686 |
| H | 5.049338 | 4.400223 | 0.747121  |
| C | 4.220381 | 2.435324 | 0.456671  |
| H | 3.229701 | 2.529374 | 0.906938  |
| C | 5.174448 | 1.828607 | 1.504194  |
| H | 4.816972 | 0.820660 | 1.731878  |



|   |           |           |           |
|---|-----------|-----------|-----------|
| C | 5.275111  | 2.605140  | 2.735965  |
| H | 6.166675  | 1.713596  | 1.052298  |
| C | 5.345959  | 3.242243  | 3.753990  |
| H | 5.408991  | 3.807725  | 4.653609  |
| N | 4.735926  | -3.472467 | 0.240680  |
| C | 4.133690  | -2.313962 | -0.136127 |
| N | 4.243791  | -1.880898 | -1.397523 |
| C | 4.943667  | -2.627901 | -2.431201 |
| C | 6.121539  | -3.367095 | -1.810174 |
| C | 5.620427  | -4.225543 | -0.656137 |
| C | 3.287263  | -3.500312 | 2.249389  |
| C | 3.307892  | -1.981499 | 2.135803  |
| N | 3.428847  | -1.594763 | 0.738277  |
| C | 4.526306  | -4.065476 | 1.566943  |
| H | 5.274562  | -1.912273 | -3.184928 |
| H | 4.266443  | -3.335401 | -2.927520 |
| H | 6.855118  | -2.641358 | -1.447136 |
| H | 6.617489  | -4.001783 | -2.548208 |
| H | 5.084298  | -5.105165 | -1.035126 |
| H | 6.461260  | -4.593634 | -0.060390 |
| H | 4.430770  | -5.147595 | 1.435121  |
| H | 5.418068  | -3.893309 | 2.183080  |
| H | 2.384177  | -3.889662 | 1.769925  |
| H | 3.271398  | -3.815246 | 3.295440  |
| H | 4.136951  | -1.571019 | 2.728003  |
| H | 2.389075  | -1.536350 | 2.520073  |
| H | 3.827573  | -0.967172 | -1.663728 |
| O | -5.546088 | 2.029257  | 0.945183  |
| O | 1.966751  | 0.482900  | 0.027046  |
| C | -5.560631 | 0.958012  | 0.386921  |
| C | -4.349738 | 0.209670  | -0.128550 |
| H | -4.433347 | 0.170223  | -1.221647 |
| H | -4.428063 | -0.831108 | 0.202976  |
| C | -3.018916 | 0.831733  | 0.292370  |
| H | -2.992102 | 1.877700  | -0.029048 |
| H | -2.960521 | 0.855545  | 1.386199  |
| C | -1.807874 | 0.083059  | -0.273346 |
| H | -1.868981 | 0.070122  | -1.369936 |
| H | -1.850518 | -0.968894 | 0.040728  |
| C | -0.467861 | 0.688903  | 0.154270  |
| H | -0.425516 | 1.740984  | -0.151424 |
| H | -0.388744 | 0.686270  | 1.248784  |
| C | 0.751737  | -0.045787 | -0.419135 |
| H | 0.706842  | -0.036193 | -1.522318 |

|   |            |           |           |
|---|------------|-----------|-----------|
| H | 0.671948   | -1.114311 | -0.135575 |
| O | -6.695691  | 0.270623  | 0.132720  |
| C | -7.934630  | 0.906363  | 0.555407  |
| C | -9.070345  | -0.011217 | 0.202637  |
| H | -8.016318  | 1.870621  | 0.050112  |
| H | -7.880280  | 1.093547  | 1.628991  |
| C | -9.572802  | -0.915388 | 1.142398  |
| C | -9.629086  | 0.011924  | -1.079064 |
| C | -10.614921 | -1.778766 | 0.810689  |
| H | -9.145993  | -0.942265 | 2.140801  |
| C | -10.669575 | -0.850269 | -1.415121 |
| H | -9.246129  | 0.710617  | -1.817169 |
| H | -10.998327 | -2.473255 | 1.551247  |
| C | -11.165036 | -1.747532 | -0.469493 |
| H | -11.096378 | -0.820071 | -2.412441 |
| H | -11.978614 | -2.417319 | -0.728827 |
| H | 2.890283   | -0.723384 | 0.411723  |

80 atoms

addition of another 7-isomer unit to the  $\epsilon$ -CL chain end,  
structure I2, in toluene

|   |           |           |           |
|---|-----------|-----------|-----------|
| O | -3.100006 | -0.445046 | -2.156934 |
| O | -4.023030 | -1.474047 | -0.389726 |
| C | -2.826660 | -1.281708 | -1.113074 |
| C | -2.219416 | -2.582799 | -1.662006 |
| H | -1.627290 | -3.063479 | -0.878769 |
| H | -1.522419 | -2.292788 | -2.451227 |
| C | -3.255309 | -3.576341 | -2.212233 |
| H | -4.031736 | -3.031157 | -2.757845 |
| H | -2.760613 | -4.222014 | -2.945589 |
| C | -3.878305 | -4.474713 | -1.131843 |
| H | -3.068635 | -5.005604 | -0.613761 |
| H | -4.481838 | -5.250765 | -1.615835 |
| C | -4.753834 | -3.761135 | -0.093280 |
| H | -5.681051 | -3.411644 | -0.562911 |
| H | -5.042554 | -4.477703 | 0.682903  |
| C | -4.099355 | -2.544174 | 0.563377  |
| H | -3.098934 | -2.785700 | 0.935042  |
| C | -4.926094 | -1.982122 | 1.736857  |
| H | -4.460237 | -1.045501 | 2.056620  |
| C | -5.033008 | -2.890663 | 2.874205  |
| H | -5.924679 | -1.721543 | 1.368065  |
| C | -5.104451 | -3.637383 | 3.814578  |

|   |           |           |           |
|---|-----------|-----------|-----------|
| H | -5.172661 | -4.298780 | 4.645888  |
| N | -4.800523 | 3.605375  | 0.206575  |
| C | -4.135036 | 2.459341  | -0.168793 |
| N | -4.194986 | 1.918064  | -1.350964 |
| C | -4.980945 | 2.587991  | -2.375318 |
| C | -6.214670 | 3.270491  | -1.788938 |
| C | -5.775020 | 4.229774  | -0.690225 |
| C | -3.510470 | 3.707745  | 2.326374  |
| C | -3.413241 | 2.194837  | 2.185124  |
| N | -3.316367 | 1.877718  | 0.771937  |
| C | -4.718077 | 4.202202  | 1.540221  |
| H | -5.274639 | 1.843897  | -3.121460 |
| H | -4.368352 | 3.332347  | -2.908352 |
| H | -6.881111 | 2.508813  | -1.371078 |
| H | -6.774910 | 3.816467  | -2.553732 |
| H | -5.342316 | 5.141288  | -1.125322 |
| H | -6.636159 | 4.543600  | -0.089399 |
| H | -4.674795 | 5.291107  | 1.423944  |
| H | -5.642121 | 3.981442  | 2.095197  |
| H | -2.594049 | 4.161966  | 1.938245  |
| H | -3.613371 | 4.000773  | 3.374499  |
| H | -4.283645 | 1.717028  | 2.662460  |
| H | -2.520527 | 1.809236  | 2.682265  |
| H | -3.519527 | 0.406151  | -1.812997 |
| O | 5.575286  | -2.052140 | 0.920525  |
| O | -1.941220 | -0.651542 | -0.148447 |
| C | 5.581585  | -0.989315 | 0.346181  |
| C | 4.367418  | -0.278715 | -0.214179 |
| H | 4.479479  | -0.254312 | -1.305032 |
| H | 4.410571  | 0.768370  | 0.103015  |
| C | 3.042592  | -0.928623 | 0.182163  |
| H | 3.050632  | -1.979993 | -0.121578 |
| H | 2.953994  | -0.934117 | 1.273977  |
| C | 1.832482  | -0.217713 | -0.431292 |
| H | 1.922769  | -0.224354 | -1.525424 |
| H | 1.840603  | 0.839512  | -0.135607 |
| C | 0.496658  | -0.849084 | -0.024933 |
| H | 0.480477  | -1.904364 | -0.318647 |
| H | 0.392083  | -0.829632 | 1.066100  |
| C | -0.697287 | -0.129157 | -0.643350 |
| H | -0.680443 | -0.182154 | -1.733924 |
| H | -0.673081 | 0.933941  | -0.379010 |
| O | 6.704215  | -0.277949 | 0.111686  |
| C | 7.948582  | -0.873223 | 0.578133  |

|   |           |           |           |
|---|-----------|-----------|-----------|
| C | 9.067365  | 0.070671  | 0.241728  |
| H | 8.069830  | -1.842036 | 0.089932  |
| H | 7.868729  | -1.045603 | 1.652522  |
| C | 9.515551  | 1.005489  | 1.178972  |
| C | 9.663017  | 0.042156  | -1.023102 |
| C | 10.540485 | 1.894181  | 0.861035  |
| H | 9.059931  | 1.036596  | 2.164423  |
| C | 10.686529 | 0.929586  | -1.345322 |
| H | 9.322460  | -0.680485 | -1.758947 |
| H | 10.881696 | 2.612624  | 1.599336  |
| C | 11.127507 | 1.857686  | -0.402515 |
| H | 11.142464 | 0.895201  | -2.329500 |
| H | 11.927634 | 2.547452  | -0.650991 |
| H | -2.962030 | 0.961913  | 0.511561  |

80 atoms

addition of another 7-isomer unit to the  $\epsilon$ -CL chain end,  
structure TS2r, in toluene

|   |           |           |           |
|---|-----------|-----------|-----------|
| O | -3.187862 | -0.468550 | -2.185846 |
| O | -4.059719 | -1.474222 | -0.379308 |
| C | -2.889702 | -1.307049 | -1.150423 |
| C | -2.330885 | -2.622986 | -1.718848 |
| H | -1.698399 | -3.102073 | -0.966323 |
| H | -1.680071 | -2.352213 | -2.552657 |
| C | -3.407793 | -3.610646 | -2.196105 |
| H | -4.204334 | -3.063559 | -2.709909 |
| H | -2.960188 | -4.274296 | -2.943593 |
| C | -3.986198 | -4.484049 | -1.071489 |
| H | -3.157459 | -5.013568 | -0.582980 |
| H | -4.618601 | -5.262573 | -1.512785 |
| C | -4.805218 | -3.744337 | -0.005933 |
| H | -5.749493 | -3.392085 | -0.438088 |
| H | -5.065038 | -4.444385 | 0.795126  |
| C | -4.106202 | -2.524879 | 0.597477  |
| H | -3.092747 | -2.773498 | 0.926599  |
| C | -4.869512 | -1.930158 | 1.797539  |
| H | -4.374261 | -0.996781 | 2.080645  |
| C | -4.939336 | -2.818506 | 2.953599  |
| H | -5.879511 | -1.658481 | 1.470045  |
| C | -4.980173 | -3.548862 | 3.908543  |
| H | -5.021159 | -4.195580 | 4.753081  |
| N | -4.707360 | 3.634483  | 0.211729  |
| C | -4.081342 | 2.472733  | -0.182639 |

|   |           |           |           |
|---|-----------|-----------|-----------|
| N | -4.213147 | 1.917119  | -1.352079 |
| C | -5.042540 | 2.585890  | -2.342243 |
| C | -6.231911 | 3.296396  | -1.700174 |
| C | -5.718584 | 4.263006  | -0.640495 |
| C | -3.302466 | 3.744011  | 2.256400  |
| C | -3.237076 | 2.227902  | 2.132535  |
| N | -3.222291 | 1.889712  | 0.720855  |
| C | -4.543617 | 4.247356  | 1.530505  |
| H | -5.387614 | 1.836652  | -3.060715 |
| H | -4.447863 | 3.312754  | -2.917982 |
| H | -6.886617 | 2.551408  | -1.236187 |
| H | -6.824075 | 3.841148  | -2.441414 |
| H | -5.295474 | 5.161251  | -1.111165 |
| H | -6.541014 | 4.599126  | 0.001097  |
| H | -4.490282 | 5.333803  | 1.396816  |
| H | -5.439307 | 4.048571  | 2.137837  |
| H | -2.401837 | 4.177498  | 1.811659  |
| H | -3.342493 | 4.053260  | 3.304135  |
| H | -4.087602 | 1.771304  | 2.663408  |
| H | -2.324785 | 1.834514  | 2.586153  |
| H | -3.577852 | 0.391388  | -1.830180 |
| O | 5.524520  | -1.960057 | 1.097428  |
| O | -1.954080 | -0.693148 | -0.224732 |
| C | 5.547473  | -0.968925 | 0.407031  |
| C | 4.347366  | -0.321982 | -0.252204 |
| H | 4.474916  | -0.429398 | -1.336357 |
| H | 4.394338  | 0.755206  | -0.061962 |
| C | 3.012577  | -0.912578 | 0.199586  |
| H | 3.019721  | -1.993249 | 0.027338  |
| H | 2.907721  | -0.783988 | 1.282379  |
| C | 1.815259  | -0.278122 | -0.514477 |
| H | 1.921134  | -0.419248 | -1.598074 |
| H | 1.824096  | 0.807302  | -0.350404 |
| C | 0.471491  | -0.851584 | -0.052710 |
| H | 0.452808  | -1.935058 | -0.215690 |
| H | 0.353475  | -0.699789 | 1.026556  |
| C | -0.713458 | -0.213854 | -0.769013 |
| H | -0.677908 | -0.399964 | -1.844220 |
| H | -0.696859 | 0.873927  | -0.636382 |
| O | 6.678430  | -0.293378 | 0.114084  |
| C | 7.910136  | -0.835518 | 0.670777  |
| C | 9.038547  | 0.067723  | 0.262732  |
| H | 8.041874  | -1.850717 | 0.292254  |
| H | 7.802782  | -0.892054 | 1.755199  |

|   |           |           |           |
|---|-----------|-----------|-----------|
| C | 9.394313  | 1.162240  | 1.056486  |
| C | 9.735120  | -0.158763 | -0.927900 |
| C | 10.426272 | 2.013837  | 0.669490  |
| H | 8.859860  | 1.347433  | 1.983728  |
| C | 10.767886 | 0.690462  | -1.318457 |
| H | 9.467093  | -1.006318 | -1.551959 |
| H | 10.694855 | 2.857941  | 1.296413  |
| C | 11.115207 | 1.778879  | -0.519601 |
| H | 11.302993 | 0.501580  | -2.243460 |
| H | 11.921650 | 2.439650  | -0.820856 |
| H | -2.901014 | 0.962968  | 0.456399  |

80 atoms

addition of another 7-isomer unit to the  $\epsilon$ -CL chain end,  
structure I2r, in toluene

|   |           |           |           |
|---|-----------|-----------|-----------|
| O | -3.358586 | -0.647817 | -2.224143 |
| O | -4.354843 | -1.298481 | -0.322660 |
| C | -3.254067 | -1.520277 | -1.178571 |
| C | -3.179444 | -2.952521 | -1.734560 |
| H | -2.652233 | -3.594153 | -1.021622 |
| H | -2.561396 | -2.904286 | -2.633120 |
| C | -4.547163 | -3.566624 | -2.072120 |
| H | -5.180937 | -2.808377 | -2.542448 |
| H | -4.396528 | -4.349642 | -2.822927 |
| C | -5.258953 | -4.197302 | -0.864598 |
| H | -4.588833 | -4.944324 | -0.418642 |
| H | -6.134390 | -4.754423 | -1.216721 |
| C | -5.716159 | -3.219961 | 0.225946  |
| H | -6.546544 | -2.607516 | -0.145190 |
| H | -6.099479 | -3.789515 | 1.079159  |
| C | -4.629947 | -2.257817 | 0.708845  |
| H | -3.713677 | -2.795876 | 0.969838  |
| C | -5.065563 | -1.428854 | 1.933208  |
| H | -4.289292 | -0.682734 | 2.125984  |
| C | -5.290775 | -2.224189 | 3.136240  |
| H | -5.973692 | -0.872525 | 1.674567  |
| C | -5.458601 | -2.883357 | 4.128383  |
| H | -5.612743 | -3.465031 | 5.006483  |
| N | -3.550933 | 3.769289  | 0.075791  |
| C | -3.264456 | 2.479208  | -0.311031 |
| N | -3.582728 | 1.958481  | -1.460346 |
| C | -4.248478 | 2.805052  | -2.437977 |
| C | -5.186766 | 3.809784  | -1.773020 |

|   |           |           |           |
|---|-----------|-----------|-----------|
| C | -4.399180 | 4.625644  | -0.755678 |
| C | -2.091225 | 3.537397  | 2.072308  |
| C | -2.423784 | 2.054365  | 1.979643  |
| N | -2.549905 | 1.706650  | 0.575809  |
| C | -3.184475 | 4.336485  | 1.374297  |
| H | -4.803715 | 2.160540  | -3.125613 |
| H | -3.508713 | 3.343626  | -3.051186 |
| H | -5.993266 | 3.267376  | -1.268740 |
| H | -5.646469 | 4.478673  | -2.506593 |
| H | -3.777569 | 5.376668  | -1.262495 |
| H | -5.080516 | 5.172532  | -0.094114 |
| H | -2.855251 | 5.369422  | 1.214078  |
| H | -4.078334 | 4.386698  | 2.013855  |
| H | -1.125114 | 3.717251  | 1.591874  |
| H | -2.013383 | 3.859722  | 3.113899  |
| H | -3.342885 | 1.839698  | 2.547715  |
| H | -1.627060 | 1.444627  | 2.410873  |
| H | -3.452484 | 0.296808  | -1.883299 |
| O | 4.977335  | 0.763746  | 1.754483  |
| O | -2.105855 | -1.214764 | -0.345363 |
| C | 5.181038  | 0.169831  | 0.722226  |
| C | 4.120133  | -0.400690 | -0.195424 |
| H | 4.387448  | -1.439668 | -0.415617 |
| H | 4.198878  | 0.126213  | -1.153916 |
| C | 2.704765  | -0.296953 | 0.370094  |
| H | 2.656113  | -0.831543 | 1.324820  |
| H | 2.484343  | 0.749627  | 0.602438  |
| C | 1.645401  | -0.850715 | -0.587590 |
| H | 1.878094  | -1.896916 | -0.824831 |
| H | 1.694364  | -0.306461 | -1.539432 |
| C | 0.225723  | -0.757850 | -0.019216 |
| H | 0.161375  | -1.323644 | 0.917459  |
| H | -0.008313 | 0.284124  | 0.224046  |
| C | -0.825967 | -1.286376 | -0.984030 |
| H | -0.599115 | -2.325690 | -1.253205 |
| H | -0.844843 | -0.695138 | -1.905125 |
| O | 6.416118  | -0.064350 | 0.231460  |
| C | 7.525484  | 0.452856  | 1.020256  |
| C | 8.803032  | 0.072239  | 0.328463  |
| H | 7.461210  | 0.028190  | 2.023416  |
| H | 7.413450  | 1.535106  | 1.105222  |
| C | 9.390793  | 0.932247  | -0.603584 |
| C | 9.412496  | -1.158391 | 0.591290  |
| C | 10.565469 | 0.571659  | -1.259952 |

|   |           |           |           |
|---|-----------|-----------|-----------|
| H | 8.926015  | 1.890757  | -0.815438 |
| C | 10.586438 | -1.522977 | -0.063310 |
| H | 8.964590  | -1.834070 | 1.314153  |
| H | 11.013532 | 1.250089  | -1.978713 |
| C | 11.165331 | -0.657452 | -0.990599 |
| H | 11.051175 | -2.479677 | 0.152143  |
| H | 12.082025 | -0.938643 | -1.498853 |
| H | -2.480811 | 0.727731  | 0.317190  |

80 atoms

addition of another 7-isomer unit to the  $\epsilon$ -CL chain end,  
structure TS23, in toluene

|   |           |           |           |
|---|-----------|-----------|-----------|
| O | -3.244473 | -0.451222 | -2.188026 |
| O | -4.361403 | -1.126478 | -0.349465 |
| C | -3.281203 | -1.427149 | -1.231249 |
| C | -3.423426 | -2.784346 | -1.940327 |
| H | -3.061688 | -3.579086 | -1.280740 |
| H | -2.742220 | -2.751682 | -2.793114 |
| C | -4.847623 | -3.103735 | -2.420942 |
| H | -5.307007 | -2.195029 | -2.822159 |
| H | -4.782137 | -3.808900 | -3.256456 |
| C | -5.739895 | -3.730921 | -1.339089 |
| H | -5.251147 | -4.643346 | -0.972313 |
| H | -6.680532 | -4.058935 | -1.795624 |
| C | -6.071194 | -2.828655 | -0.143652 |
| H | -6.744127 | -2.021326 | -0.456005 |
| H | -6.608485 | -3.416780 | 0.607548  |
| C | -4.852892 | -2.171200 | 0.507603  |
| H | -4.060546 | -2.903073 | 0.689022  |
| C | -5.182201 | -1.491356 | 1.850849  |
| H | -4.277780 | -0.982848 | 2.198016  |
| C | -5.639918 | -2.413473 | 2.885638  |
| H | -5.937699 | -0.716155 | 1.678358  |
| C | -6.002374 | -3.177329 | 3.741043  |
| H | -6.325632 | -3.851980 | 4.498378  |
| N | -3.038201 | 3.960345  | 0.143707  |
| C | -3.111680 | 2.620116  | -0.158503 |
| N | -2.929052 | 2.111226  | -1.341911 |
| C | -2.562913 | 3.007902  | -2.427121 |
| C | -3.230862 | 4.373758  | -2.283285 |
| C | -2.882081 | 4.955738  | -0.919048 |
| C | -3.128865 | 3.455998  | 2.573036  |
| C | -3.894776 | 2.208422  | 2.153760  |



|   |           |           |           |
|---|-----------|-----------|-----------|
| N | -3.355693 | 1.755594  | 0.883902  |
| C | -3.256109 | 4.511343  | 1.481907  |
| H | -2.851138 | 2.537913  | -3.371858 |
| H | -1.469875 | 3.137426  | -2.469591 |
| H | -4.315880 | 4.253349  | -2.368394 |
| H | -2.912303 | 5.062934  | -3.070918 |
| H | -1.852039 | 5.337945  | -0.915176 |
| H | -3.535768 | 5.803988  | -0.686886 |
| H | -2.526443 | 5.312801  | 1.643424  |
| H | -4.251495 | 4.977983  | 1.524843  |
| H | -2.078026 | 3.193621  | 2.725370  |
| H | -3.515049 | 3.856401  | 3.513934  |
| H | -4.972695 | 2.427624  | 2.096546  |
| H | -3.764519 | 1.409084  | 2.886060  |
| H | -3.165279 | 0.465972  | -1.779611 |
| O | 4.957771  | -0.064229 | 2.118661  |
| O | -2.140268 | -1.395316 | -0.365985 |
| C | 5.152661  | -0.373333 | 0.967177  |
| C | 4.090940  | -0.775528 | -0.034616 |
| H | 4.340700  | -1.779541 | -0.396723 |
| H | 4.192909  | -0.122156 | -0.908389 |
| C | 2.671009  | -0.729952 | 0.527086  |
| H | 2.606701  | -1.383440 | 1.403176  |
| H | 2.457927  | 0.279974  | 0.892561  |
| C | 1.616721  | -1.139819 | -0.505784 |
| H | 1.834574  | -2.153901 | -0.865805 |
| H | 1.692578  | -0.485170 | -1.383662 |
| C | 0.189216  | -1.086561 | 0.046399  |
| H | 0.098149  | -1.750653 | 0.913791  |
| H | -0.040634 | -0.076339 | 0.401740  |
| C | -0.857226 | -1.479935 | -0.985931 |
| H | -0.673214 | -2.502353 | -1.344941 |
| H | -0.822640 | -0.807855 | -1.848750 |
| O | 6.379195  | -0.403046 | 0.403922  |
| C | 7.489400  | -0.038128 | 1.272223  |
| C | 8.754702  | -0.123212 | 0.467538  |
| H | 7.499512  | -0.720970 | 2.123601  |
| H | 7.314029  | 0.969843  | 1.651710  |
| C | 9.239416  | 0.996368  | -0.214772 |
| C | 9.455692  | -1.329128 | 0.371784  |
| C | 10.402557 | 0.914548  | -0.976976 |
| H | 8.702873  | 1.938301  | -0.147190 |
| C | 10.618654 | -1.415288 | -0.389652 |
| H | 9.088171  | -2.205164 | 0.898238  |

|   |           |           |           |
|---|-----------|-----------|-----------|
| H | 10.770114 | 1.792171  | -1.498865 |
| C | 11.094360 | -0.292416 | -1.065593 |
| H | 11.155211 | -2.356441 | -0.453020 |
| H | 12.002357 | -0.357156 | -1.656427 |
| H | -3.556299 | 0.808749  | 0.586547  |

80 atoms

addition of another 7-isomer unit to the  $\epsilon$ -CL chain end,  
structure I3, in toluene

|   |           |           |           |
|---|-----------|-----------|-----------|
| O | -2.962158 | -0.240139 | -2.036146 |
| O | -3.947962 | -1.365177 | -0.356175 |
| C | -2.851909 | -1.366957 | -1.269338 |
| C | -2.863613 | -2.597392 | -2.197881 |
| H | -2.303440 | -3.411139 | -1.726761 |
| H | -2.309661 | -2.313169 | -3.094842 |
| C | -4.267039 | -3.094017 | -2.581291 |
| H | -4.914874 | -2.237035 | -2.791281 |
| H | -4.187847 | -3.654878 | -3.518813 |
| C | -4.910935 | -4.018436 | -1.533402 |
| H | -4.224388 | -4.853759 | -1.342138 |
| H | -5.814143 | -4.467538 | -1.961575 |
| C | -5.286010 | -3.364937 | -0.195830 |
| H | -6.141111 | -2.692119 | -0.334955 |
| H | -5.607267 | -4.141937 | 0.505916  |
| C | -4.160589 | -2.546258 | 0.435428  |
| H | -3.232556 | -3.121471 | 0.479495  |
| C | -4.479111 | -2.056542 | 1.861423  |
| H | -3.687273 | -1.363097 | 2.158789  |
| C | -4.589098 | -3.134802 | 2.839051  |
| H | -5.410834 | -1.478960 | 1.842889  |
| C | -4.665719 | -4.029593 | 3.639245  |
| H | -4.734339 | -4.817693 | 4.351514  |
| N | -4.617073 | 3.696589  | 0.288891  |
| C | -4.241888 | 2.415120  | -0.044575 |
| N | -3.139456 | 2.096713  | -0.661374 |
| C | -2.193889 | 3.160458  | -0.958748 |
| C | -2.905517 | 4.463071  | -1.320679 |
| C | -3.845773 | 4.847876  | -0.184766 |
| C | -6.491628 | 2.826140  | 1.670138  |
| C | -6.461873 | 1.633399  | 0.722368  |
| N | -5.083528 | 1.400666  | 0.336719  |
| C | -5.864744 | 4.030099  | 0.977330  |
| H | -1.556014 | 2.831302  | -1.784194 |

|   |           |           |           |
|---|-----------|-----------|-----------|
| H | -1.523659 | 3.334403  | -0.102165 |
| H | -3.477886 | 4.313662  | -2.242110 |
| H | -2.195117 | 5.275340  | -1.501146 |
| H | -3.280465 | 5.277585  | 0.653517  |
| H | -4.552230 | 5.617002  | -0.517552 |
| H | -5.651555 | 4.818719  | 1.707892  |
| H | -6.574659 | 4.456029  | 0.252681  |
| H | -5.930165 | 2.575143  | 2.574627  |
| H | -7.515253 | 3.070197  | 1.966350  |
| H | -7.111359 | 1.823527  | -0.146412 |
| H | -6.837162 | 0.733680  | 1.214805  |
| H | -3.002234 | 0.588149  | -1.460503 |
| O | 5.321741  | 0.177256  | 2.141081  |
| O | -1.702489 | -1.346596 | -0.421582 |
| C | 5.529863  | -0.035733 | 0.970381  |
| C | 4.480676  | -0.366033 | -0.070348 |
| H | 4.787353  | -1.289743 | -0.573433 |
| H | 4.526807  | 0.410501  | -0.842891 |
| C | 3.069682  | -0.488112 | 0.502452  |
| H | 3.057934  | -1.265066 | 1.274005  |
| H | 2.804309  | 0.442851  | 1.013518  |
| C | 2.023892  | -0.807593 | -0.570319 |
| H | 2.299090  | -1.739409 | -1.081571 |
| H | 2.040396  | -0.024882 | -1.339897 |
| C | 0.607869  | -0.933979 | -0.000634 |
| H | 0.579605  | -1.723760 | 0.758775  |
| H | 0.320096  | -0.006282 | 0.505509  |
| C | -0.433753 | -1.242660 | -1.066150 |
| H | -0.185849 | -2.182934 | -1.578446 |
| H | -0.466241 | -0.448804 | -1.819738 |
| O | 6.760961  | -0.002896 | 0.417199  |
| C | 7.857962  | 0.315655  | 1.319979  |
| C | 9.133395  | 0.288205  | 0.527331  |
| H | 7.863235  | -0.417262 | 2.128457  |
| H | 7.670249  | 1.297676  | 1.757606  |
| C | 9.599867  | 1.442714  | -0.108180 |
| C | 9.862535  | -0.897332 | 0.395796  |
| C | 10.772456 | 1.414796  | -0.859437 |
| H | 9.041442  | 2.369344  | -0.012370 |
| C | 11.035600 | -0.929485 | -0.354536 |
| H | 9.509469  | -1.800137 | 0.885673  |
| H | 11.125562 | 2.318915  | -1.344803 |
| C | 11.492705 | 0.227615  | -0.983681 |
| H | 11.594201 | -1.855414 | -0.445647 |

|   |           |          |           |
|---|-----------|----------|-----------|
| H | 12.408344 | 0.205041 | -1.565779 |
| H | -4.801324 | 0.478354 | 0.025555  |

80 atoms

addition of another 7-isomer unit to the  $\epsilon$ -CL chain end,  
structure TS3r, in toluene

|   |           |           |           |
|---|-----------|-----------|-----------|
| O | -3.055835 | -0.218428 | -2.070274 |
| O | -4.042252 | -1.184770 | -0.292028 |
| C | -3.064727 | -1.362722 | -1.328718 |
| C | -3.400253 | -2.551131 | -2.245575 |
| H | -2.964646 | -3.458297 | -1.818425 |
| H | -2.867452 | -2.362480 | -3.180984 |
| C | -4.898635 | -2.761544 | -2.510505 |
| H | -5.386885 | -1.792036 | -2.653317 |
| H | -5.012169 | -3.302895 | -3.456011 |
| C | -5.610088 | -3.574059 | -1.414553 |
| H | -5.086798 | -4.532871 | -1.303546 |
| H | -6.621725 | -3.824301 | -1.753601 |
| C | -5.716797 | -2.903544 | -0.037181 |
| H | -6.433528 | -2.074134 | -0.079450 |
| H | -6.114216 | -3.626890 | 0.682742  |
| C | -4.398160 | -2.336555 | 0.490306  |
| H | -3.598491 | -3.078725 | 0.427112  |
| C | -4.477040 | -1.858739 | 1.953737  |
| H | -3.542170 | -1.339865 | 2.184501  |
| C | -4.694397 | -2.938817 | 2.911258  |
| H | -5.278957 | -1.117041 | 2.048076  |
| C | -4.862920 | -3.836704 | 3.693637  |
| H | -5.010613 | -4.628895 | 4.389179  |
| N | -3.958768 | 3.906813  | 0.356390  |
| C | -3.781384 | 2.583244  | 0.028038  |
| N | -2.823684 | 2.123854  | -0.728863 |
| C | -1.827982 | 3.065694  | -1.216451 |
| C | -2.442567 | 4.429987  | -1.522419 |
| C | -3.144587 | 4.948790  | -0.273580 |
| C | -5.690729 | 3.293789  | 2.030627  |
| C | -5.935267 | 2.083921  | 1.137680  |
| N | -4.663112 | 1.681814  | 0.567993  |
| C | -5.044650 | 4.399995  | 1.205450  |
| H | -1.368382 | 2.643382  | -2.114660 |
| H | -1.015635 | 3.186985  | -0.482338 |
| H | -3.165647 | 4.322586  | -2.337577 |
| H | -1.685226 | 5.150416  | -1.845220 |

|   |           |           |           |
|---|-----------|-----------|-----------|
| H | -2.411018 | 5.327189  | 0.451329  |
| H | -3.802938 | 5.787851  | -0.525452 |
| H | -4.637590 | 5.175573  | 1.863997  |
| H | -5.802446 | 4.888066  | 0.574858  |
| H | -5.032201 | 3.000974  | 2.853406  |
| H | -6.625186 | 3.661443  | 2.462463  |
| H | -6.679461 | 2.328100  | 0.363760  |
| H | -6.332904 | 1.246325  | 1.714816  |
| H | -2.969630 | 0.609676  | -1.498651 |
| O | 5.511627  | -2.149625 | 1.348332  |
| O | -1.828450 | -1.637661 | -0.657717 |
| C | 5.531363  | -1.213767 | 0.584836  |
| C | 4.338894  | -0.653557 | -0.161528 |
| H | 4.567843  | -0.697227 | -1.232558 |
| H | 4.270614  | 0.414546  | 0.073912  |
| C | 3.028795  | -1.373842 | 0.152232  |
| H | 3.135455  | -2.437813 | -0.082514 |
| H | 2.837680  | -1.324414 | 1.229174  |
| C | 1.837338  | -0.789776 | -0.612996 |
| H | 2.035504  | -0.842321 | -1.691576 |
| H | 1.739715  | 0.277618  | -0.375795 |
| C | 0.519424  | -1.504466 | -0.299027 |
| H | 0.601386  | -2.568868 | -0.546402 |
| H | 0.311926  | -1.450640 | 0.775570  |
| C | -0.663694 | -0.913329 | -1.052028 |
| H | -0.510559 | -0.992768 | -2.134827 |
| H | -0.776516 | 0.148855  | -0.809276 |
| O | 6.652039  | -0.522773 | 0.285657  |
| C | 7.873108  | -0.971300 | 0.939464  |
| C | 8.998413  | -0.094577 | 0.469240  |
| H | 8.036365  | -2.019329 | 0.682304  |
| H | 7.730341  | -0.908437 | 2.019535  |
| C | 9.356878  | 1.049734  | 1.187286  |
| C | 9.690382  | -0.398966 | -0.707089 |
| C | 10.387646 | 1.873994  | 0.740998  |
| H | 8.826014  | 1.295928  | 2.102298  |
| C | 10.720566 | 0.422865  | -1.157168 |
| H | 9.420193  | -1.285960 | -1.272691 |
| H | 10.658570 | 2.757470  | 1.310016  |
| C | 11.071344 | 1.561564  | -0.432807 |
| H | 11.251821 | 0.173580  | -2.070036 |
| H | 11.876472 | 2.200873  | -0.780363 |
| H | -4.546628 | 0.730367  | 0.236855  |

80 atoms

addition of another 7-isomer unit to the  $\epsilon$ -CL chain end,  
structure I3r, in toluene

|   |           |           |           |
|---|-----------|-----------|-----------|
| O | -3.424780 | -0.225714 | -2.160050 |
| O | -3.700549 | -1.168170 | -0.137823 |
| C | -3.283696 | -1.417629 | -1.499325 |
| C | -4.129537 | -2.488399 | -2.200491 |
| H | -3.678356 | -3.468194 | -2.022083 |
| H | -4.022649 | -2.287695 | -3.268546 |
| C | -5.610470 | -2.504585 | -1.798922 |
| H | -5.981698 | -1.477444 | -1.718599 |
| H | -6.181145 | -2.971129 | -2.608958 |
| C | -5.896751 | -3.289584 | -0.507702 |
| H | -5.494092 | -4.304203 | -0.624562 |
| H | -6.980069 | -3.410168 | -0.394279 |
| C | -5.343661 | -2.681019 | 0.788388  |
| H | -5.903961 | -1.772827 | 1.044066  |
| H | -5.501020 | -3.387377 | 1.610176  |
| C | -3.863134 | -2.302484 | 0.727020  |
| H | -3.262229 | -3.133240 | 0.346729  |
| C | -3.284927 | -1.882648 | 2.093983  |
| H | -2.263843 | -1.524115 | 1.932770  |
| C | -3.275169 | -2.954816 | 3.084387  |
| H | -3.853757 | -1.027055 | 2.475977  |
| C | -3.257745 | -3.846516 | 3.891404  |
| H | -3.241245 | -4.633885 | 4.607652  |
| N | -3.813313 | 3.877586  | 0.394763  |
| C | -3.659017 | 2.552415  | 0.060295  |
| N | -2.850879 | 2.101062  | -0.857421 |
| C | -1.995226 | 3.058230  | -1.541533 |
| C | -2.697179 | 4.399386  | -1.746776 |
| C | -3.166277 | 4.926931  | -0.396323 |
| C | -5.195095 | 3.255719  | 2.367343  |
| C | -5.556123 | 2.018767  | 1.554380  |
| N | -4.390101 | 1.638348  | 0.778972  |
| C | -4.740009 | 4.360011  | 1.420541  |
| H | -1.702763 | 2.629384  | -2.504253 |
| H | -1.061846 | 3.215861  | -0.978262 |
| H | -3.557805 | 4.255222  | -2.408077 |
| H | -2.036774 | 5.132525  | -2.219203 |
| H | -2.321167 | 5.341988  | 0.169663  |
| H | -3.886410 | 5.741530  | -0.533293 |
| H | -4.242655 | 5.159217  | 1.981717  |

|   |           |           |           |
|---|-----------|-----------|-----------|
| H | -5.613246 | 4.815758  | 0.930823  |
| H | -4.392559 | 3.000288  | 3.065277  |
| H | -6.049007 | 3.608346  | 2.951674  |
| H | -6.430876 | 2.225615  | 0.918288  |
| H | -5.821264 | 1.184076  | 2.207002  |
| H | -3.160568 | 0.569717  | -1.603539 |
| O | 5.507327  | -2.640285 | -0.035012 |
| O | -1.959920 | -1.919729 | -1.491919 |
| C | 5.380701  | -1.441196 | -0.107212 |
| C | 4.079785  | -0.698803 | -0.329111 |
| H | 4.224263  | -0.013650 | -1.171606 |
| H | 3.917246  | -0.052914 | 0.541879  |
| C | 2.882131  | -1.618435 | -0.560787 |
| H | 3.075415  | -2.252717 | -1.432312 |
| H | 2.780454  | -2.301720 | 0.288352  |
| C | 1.576909  | -0.842965 | -0.763804 |
| H | 1.689508  | -0.154047 | -1.610930 |
| H | 1.387645  | -0.212111 | 0.114575  |
| C | 0.371522  | -1.756113 | -1.007592 |
| H | 0.544268  | -2.374559 | -1.895649 |
| H | 0.250711  | -2.448849 | -0.166853 |
| C | -0.922044 | -0.979817 | -1.200994 |
| H | -0.827623 | -0.272713 | -2.032377 |
| H | -1.172324 | -0.404874 | -0.303071 |
| O | 6.411680  | -0.577142 | 0.008564  |
| C | 7.721047  | -1.171698 | 0.235832  |
| C | 8.726302  | -0.058809 | 0.318600  |
| H | 7.936199  | -1.856573 | -0.586072 |
| H | 7.680131  | -1.754819 | 1.157491  |
| C | 9.024601  | 0.539488  | 1.546293  |
| C | 9.363020  | 0.410121  | -0.834294 |
| C | 9.941988  | 1.584928  | 1.622103  |
| H | 8.535745  | 0.182975  | 2.448266  |
| C | 10.280871 | 1.455352  | -0.762866 |
| H | 9.138865  | -0.047595 | -1.793407 |
| H | 10.167368 | 2.038222  | 2.582017  |
| C | 10.572102 | 2.044652  | 0.466628  |
| H | 10.770884 | 1.807489  | -1.664845 |
| H | 11.289694 | 2.856737  | 0.524417  |
| H | -4.306999 | 0.685957  | 0.440913  |

80 atoms

addition of another 7-isomer unit to the  $\epsilon$ -CL chain end,  
structure TS34, in toluene

|   |           |           |           |
|---|-----------|-----------|-----------|
| O | -3.241752 | -0.171360 | -2.247617 |
| O | -3.563282 | -1.081162 | 0.047184  |
| C | -3.100405 | -1.327558 | -1.802417 |
| C | -4.055552 | -2.442814 | -2.215016 |
| H | -3.643561 | -3.406511 | -1.906723 |
| H | -4.021433 | -2.433312 | -3.310878 |
| C | -5.510904 | -2.300527 | -1.739955 |
| H | -5.746920 | -1.240399 | -1.610975 |
| H | -6.170125 | -2.666945 | -2.535465 |
| C | -5.845004 | -3.099384 | -0.466394 |
| H | -5.497213 | -4.131014 | -0.611762 |
| H | -6.936161 | -3.169243 | -0.373873 |
| C | -5.286791 | -2.569760 | 0.862786  |
| H | -5.835371 | -1.663385 | 1.153683  |
| H | -5.482680 | -3.315883 | 1.642559  |
| C | -3.792225 | -2.206278 | 0.830250  |
| H | -3.225317 | -3.065513 | 0.432620  |
| C | -3.232759 | -1.950767 | 2.262773  |
| H | -2.208874 | -1.582051 | 2.145175  |
| C | -3.237751 | -3.113061 | 3.145608  |
| H | -3.803328 | -1.135686 | 2.726149  |
| C | -3.242212 | -4.088816 | 3.851375  |
| H | -3.243431 | -4.950426 | 4.476138  |
| N | -4.182656 | 3.687181  | 0.479955  |
| C | -3.939104 | 2.426168  | 0.045730  |
| N | -3.097595 | 2.210460  | -0.971955 |
| C | -2.395178 | 3.288664  | -1.652780 |
| C | -3.265339 | 4.539839  | -1.658405 |
| C | -3.677540 | 4.869222  | -0.229414 |
| C | -5.118006 | 2.722041  | 2.562731  |
| C | -5.509505 | 1.539421  | 1.684495  |
| N | -4.529115 | 1.376337  | 0.621598  |
| C | -4.964602 | 3.962297  | 1.691832  |
| H | -2.178057 | 2.949757  | -2.666285 |
| H | -1.434618 | 3.494216  | -1.163380 |
| H | -4.152135 | 4.362646  | -2.273803 |
| H | -2.726893 | 5.388715  | -2.086164 |
| H | -2.830626 | 5.286900  | 0.329468  |
| H | -4.470433 | 5.623205  | -0.223746 |
| H | -4.455300 | 4.758240  | 2.243913  |
| H | -5.947898 | 4.350911  | 1.398824  |
| H | -4.175122 | 2.499158  | 3.070570  |



|   |           |           |           |
|---|-----------|-----------|-----------|
| H | -5.873317 | 2.907962  | 3.329805  |
| H | -6.513527 | 1.689081  | 1.267068  |
| H | -5.534741 | 0.612208  | 2.258135  |
| H | -3.092768 | 1.265249  | -1.402290 |
| O | 5.677616  | -2.573025 | -0.397508 |
| O | -1.838519 | -1.868228 | -1.636023 |
| C | 5.523187  | -1.376105 | -0.351112 |
| C | 4.216010  | -0.641262 | -0.560820 |
| H | 4.351449  | 0.033564  | -1.414274 |
| H | 4.059611  | 0.015267  | 0.302335  |
| C | 3.019670  | -1.566363 | -0.777087 |
| H | 3.217001  | -2.220432 | -1.632336 |
| H | 2.913288  | -2.230052 | 0.087293  |
| C | 1.715398  | -0.795456 | -1.001992 |
| H | 1.829142  | -0.133962 | -1.871055 |
| H | 1.529285  | -0.136470 | -0.143558 |
| C | 0.505144  | -1.710436 | -1.212584 |
| H | 0.674735  | -2.362156 | -2.077447 |
| H | 0.380163  | -2.370422 | -0.346907 |
| C | -0.782274 | -0.930947 | -1.429864 |
| H | -0.700422 | -0.271509 | -2.300770 |
| H | -1.021938 | -0.312367 | -0.559141 |
| O | 6.526398  | -0.506700 | -0.102821 |
| C | 7.842060  | -1.092673 | 0.109245  |
| C | 8.810092  | 0.026740  | 0.366103  |
| H | 8.110574  | -1.669672 | -0.777308 |
| H | 7.780639  | -1.781924 | 0.953221  |
| C | 9.019318  | 0.500793  | 1.664604  |
| C | 9.499736  | 0.626490  | -0.691632 |
| C | 9.900650  | 1.552706  | 1.902677  |
| H | 8.489074  | 0.041715  | 2.493896  |
| C | 10.382336 | 1.678538  | -0.457795 |
| H | 9.344928  | 0.265905  | -1.704383 |
| H | 10.056845 | 1.908741  | 2.915877  |
| C | 10.584238 | 2.143524  | 0.840827  |
| H | 10.914392 | 2.132784  | -1.287416 |
| H | 11.274156 | 2.960716  | 1.025182  |
| H | -4.197337 | 0.402944  | 0.372527  |

80 atoms

addition of another 7-isomer unit to the  $\epsilon$ -CL chain end,  
structure I4, in toluene

|   |           |          |           |
|---|-----------|----------|-----------|
| O | -1.780931 | 0.206810 | -0.743422 |
|---|-----------|----------|-----------|

|   |           |           |           |
|---|-----------|-----------|-----------|
| O | -4.930799 | -1.437934 | 1.204223  |
| C | -1.576170 | -0.991128 | -0.757078 |
| C | -2.651255 | -2.044617 | -0.810316 |
| H | -3.125422 | -2.036963 | 0.176566  |
| H | -2.196767 | -3.024670 | -0.968327 |
| C | -3.719430 | -1.745016 | -1.874349 |
| H | -4.035323 | -0.702171 | -1.788689 |
| H | -3.258347 | -1.841797 | -2.864257 |
| C | -4.954904 | -2.660880 | -1.811926 |
| H | -4.641625 | -3.694917 | -1.616368 |
| H | -5.404495 | -2.678211 | -2.811200 |
| C | -6.073980 | -2.272450 | -0.827743 |
| H | -6.378213 | -1.233456 | -1.005222 |
| H | -6.945115 | -2.891899 | -1.068364 |
| C | -5.782137 | -2.437968 | 0.672008  |
| H | -5.255580 | -3.386462 | 0.829333  |
| C | -7.088812 | -2.498268 | 1.510860  |
| H | -6.795994 | -2.464141 | 2.564821  |
| C | -7.906923 | -3.681873 | 1.267031  |
| H | -7.680344 | -1.594990 | 1.320932  |
| C | -8.559585 | -4.671369 | 1.058619  |
| H | -9.142566 | -5.543697 | 0.879361  |
| N | -5.967592 | 3.413966  | 0.027159  |
| C | -5.393589 | 2.165325  | 0.132441  |
| N | -4.244288 | 1.952316  | -0.594851 |
| C | -3.458195 | 3.046092  | -1.139775 |
| C | -4.410927 | 4.024720  | -1.809611 |
| C | -5.423959 | 4.507948  | -0.780191 |
| C | -7.271847 | 2.833269  | 2.034441  |
| C | -7.128302 | 1.395127  | 1.544003  |
| N | -5.877714 | 1.177787  | 0.830636  |
| C | -7.125517 | 3.773800  | 0.846684  |
| H | -2.747921 | 2.622713  | -1.850506 |
| H | -2.872804 | 3.561512  | -0.362239 |
| H | -4.920477 | 3.520363  | -2.635995 |
| H | -3.871977 | 4.882366  | -2.220757 |
| H | -4.958131 | 5.251349  | -0.116297 |
| H | -6.261203 | 5.011711  | -1.276718 |
| H | -6.989540 | 4.805814  | 1.188964  |
| H | -8.034740 | 3.760867  | 0.229628  |
| H | -6.489557 | 3.043004  | 2.771502  |
| H | -8.237690 | 2.996567  | 2.521499  |
| H | -7.989746 | 1.143306  | 0.904584  |
| H | -7.163444 | 0.702602  | 2.390449  |

|   |           |           |           |
|---|-----------|-----------|-----------|
| H | -3.725966 | 1.118451  | -0.352906 |
| O | 7.220696  | -2.425212 | -0.188356 |
| O | -0.340955 | -1.517075 | -0.693546 |
| C | 7.115089  | -1.226676 | -0.081011 |
| C | 5.819363  | -0.444436 | -0.136544 |
| H | 5.896444  | 0.262800  | -0.970591 |
| H | 5.764378  | 0.177288  | 0.763761  |
| C | 4.581603  | -1.328440 | -0.277568 |
| H | 4.681808  | -1.952001 | -1.171581 |
| H | 4.534376  | -2.023460 | 0.567142  |
| C | 3.285129  | -0.516302 | -0.353321 |
| H | 3.337238  | 0.175966  | -1.203495 |
| H | 3.193001  | 0.110657  | 0.542706  |
| C | 2.041251  | -1.400948 | -0.488627 |
| H | 2.122555  | -2.026582 | -1.384174 |
| H | 1.973151  | -2.084015 | 0.364911  |
| C | 0.762934  | -0.586848 | -0.570648 |
| H | 0.757408  | 0.079842  | -1.436672 |
| H | 0.607786  | 0.024534  | 0.321699  |
| O | 8.165731  | -0.400790 | 0.103646  |
| C | 9.475393  | -1.035613 | 0.162562  |
| C | 10.502525 | 0.040938  | 0.366532  |
| H | 9.634510  | -1.582101 | -0.768663 |
| H | 9.472290  | -1.757909 | 0.980481  |
| C | 10.907958 | 0.401844  | 1.654582  |
| C | 11.052695 | 0.713466  | -0.728940 |
| C | 11.846053 | 1.413863  | 1.845914  |
| H | 10.487226 | -0.114098 | 2.512722  |
| C | 11.990056 | 1.726293  | -0.541902 |
| H | 10.745129 | 0.440545  | -1.734210 |
| H | 12.155167 | 1.681777  | 2.851056  |
| C | 12.388630 | 2.078134  | 0.747127  |
| H | 12.412011 | 2.238265  | -1.400687 |
| H | 13.121778 | 2.864616  | 0.894311  |
| H | -5.274917 | -0.526177 | 1.010987  |

80 atoms

addition of another 7-isomer unit to the  $\epsilon$ -CL chain end,  
structure I5, in toluene

|   |           |          |           |
|---|-----------|----------|-----------|
| O | 0.526390  | 2.220651 | 1.442283  |
| O | -6.139304 | 0.271070 | -0.048392 |
| C | 0.420831  | 1.449301 | 0.518540  |
| C | -0.872260 | 1.050037 | -0.159851 |

|   |            |           |           |
|---|------------|-----------|-----------|
| H | -0.991703  | -0.032260 | -0.030481 |
| H | -0.745319  | 1.197216  | -1.238074 |
| C | -2.096986  | 1.799507  | 0.361797  |
| H | -2.173700  | 1.654156  | 1.444246  |
| H | -1.951981  | 2.875605  | 0.215687  |
| C | -3.393897  | 1.348874  | -0.316466 |
| H | -3.543011  | 0.275849  | -0.161557 |
| H | -3.308992  | 1.493364  | -1.401923 |
| C | -4.625590  | 2.099789  | 0.196131  |
| H | -4.706467  | 1.976352  | 1.283916  |
| H | -4.512497  | 3.173007  | 0.008317  |
| C | -5.933098  | 1.622840  | -0.429346 |
| H | -5.852937  | 1.692053  | -1.524646 |
| C | -7.148815  | 2.481751  | 0.008311  |
| H | -8.056606  | 1.993114  | -0.360181 |
| C | -7.110713  | 3.859786  | -0.471016 |
| H | -7.210501  | 2.467032  | 1.102935  |
| C | -7.070182  | 4.988112  | -0.887574 |
| H | -7.036505  | 5.988802  | -1.248741 |
| N | -10.234012 | -2.040435 | 0.046252  |
| C | -9.090551  | -1.278202 | 0.062402  |
| N | -8.612018  | -0.894637 | 1.297612  |
| C | -9.011070  | -1.564268 | 2.523049  |
| C | -10.524451 | -1.730869 | 2.494703  |
| C | -10.918521 | -2.516502 | 1.250002  |
| C | -9.696704  | -2.540167 | -2.310748 |
| C | -9.002075  | -1.179709 | -2.301124 |
| N | -8.450503  | -0.860802 | -0.993449 |
| C | -10.757358 | -2.565616 | -1.217055 |
| H | -8.700540  | -0.944206 | 3.366529  |
| H | -8.523781  | -2.544826 | 2.640320  |
| H | -10.991079 | -0.741667 | 2.481069  |
| H | -10.879389 | -2.257466 | 3.384334  |
| H | -10.696884 | -3.584260 | 1.394171  |
| H | -11.998128 | -2.439780 | 1.079953  |
| H | -11.099791 | -3.591129 | -1.040538 |
| H | -11.638212 | -1.983457 | -1.520200 |
| H | -8.955110  | -3.323996 | -2.124090 |
| H | -10.160096 | -2.748043 | -3.279618 |
| H | -9.715177  | -0.402960 | -2.618883 |
| H | -8.187808  | -1.162331 | -3.031247 |
| H | -7.690226  | -0.477077 | 1.256680  |
| O | 8.520892   | -1.641952 | -1.657571 |
| O | 1.473350   | 0.818376  | -0.044180 |

|   |           |           |           |
|---|-----------|-----------|-----------|
| C | 8.733536  | -0.876331 | -0.747652 |
| C | 7.687017  | -0.073285 | -0.003553 |
| H | 7.963232  | 0.984431  | -0.080495 |
| H | 7.775920  | -0.316684 | 1.061224  |
| C | 6.264823  | -0.310813 | -0.507990 |
| H | 6.214659  | -0.073734 | -1.575615 |
| H | 6.024510  | -1.375856 | -0.427356 |
| C | 5.225506  | 0.514615  | 0.256634  |
| H | 5.475060  | 1.580444  | 0.177598  |
| H | 5.278746  | 0.269801  | 1.325170  |
| C | 3.797929  | 0.285010  | -0.250751 |
| H | 3.732851  | 0.542362  | -1.313576 |
| H | 3.537616  | -0.776032 | -0.169710 |
| C | 2.776091  | 1.103161  | 0.517806  |
| H | 2.967241  | 2.176358  | 0.436153  |
| H | 2.764916  | 0.848580  | 1.580744  |
| O | 9.965791  | -0.626149 | -0.258537 |
| C | 11.063938 | -1.340594 | -0.894883 |
| C | 12.340061 | -0.919613 | -0.224192 |
| H | 11.061829 | -1.098207 | -1.958906 |
| H | 10.882758 | -2.411971 | -0.793318 |
| C | 12.823756 | -1.618443 | 0.885690  |
| C | 13.052052 | 0.191107  | -0.686778 |
| C | 13.996592 | -1.217097 | 1.521084  |
| H | 12.278636 | -2.482904 | 1.253380  |
| C | 14.224988 | 0.595851  | -0.054089 |
| H | 12.685358 | 0.741159  | -1.548532 |
| H | 14.363266 | -1.770401 | 2.379600  |
| C | 14.699451 | -0.108464 | 1.051647  |
| H | 14.770071 | 1.457718  | -0.425194 |
| H | 15.615049 | 0.203620  | 1.543576  |
| H | -6.892301 | -0.115235 | -0.572818 |

## REFERENCES

- (1) Jazkewitsch, O.; Mondrzyk, A.; Staffel, R.; Ritter, H., Cyclodextrin-Modified Polyesters from Lactones and from Bacteria: An Approach to New Drug Carrier Systems. *Macromolecules* **2011**, *44*, 1365-1371.
- (2) Bruckner, R., In *Advanced Organic Chemistry*, Bruckner, R., Ed. Academic Press: San Diego, 2002; pp 1-42.
- (3) Becke, A. D., Density-functional thermochemistry. III. The role of exact exchange. *J. Chem. Phys.* **1993**, *98* (7), 5648-5652.
- (4) Lee, C.; Yang, W.; Parr, R. G., Development of the Colle-Salvetti correlation-energy formula into a functional of the electron density. *Phys. Rev. B* **1988**, *37* (2), 785-789.

- (5) Nifant'ev, I.; Shlyakhtin, A.; Bagrov, V.; Lozhkin, B.; Zakirova, G.; Ivchenko, P.; Legon'kova, O., Theoretical and experimental studies of 1,5,7-triazabicyclo[4.4.0]dec-5-ene-catalyzed ring opening/ring closure reaction mechanism for 5-, 6- and 7-membered cyclic esters and carbonates. *Reac. Kinet. Mech. Cat.* **2016**, *117* (2), 447-476.
- (6) Tomasi, J.; Mennucci, B.; Cammi, R., Quantum Mechanical Continuum Solvation Models. *Chem. Rev.* **2005**, *105* (8), 2999-3094.
- (7) Scalmani, G.; Frisch, M. J., Continuous surface charge polarizable continuum models of solvation. I. General formalism. *J. Chem. Phys.* **2010**, *132* (11), 114110.
- (8) Frisch, M. J.; Trucks, G. W.; Schlegel, H. B.; Scuseria, G. E.; Robb, M. A.; Cheeseman, J. R.; Scalmani, G.; Barone, V.; Petersson, G. A.; Nakatsuji, H. *Computer Program Gaussian 16, Revision B.01*, Gaussian, Inc.: Wallingford CT, 2016.
- (9) Blankenburg, J.; Kersten, E.; Maciol, K.; Wagner, M.; Zorbakhsh, S.; Frey, H., The poly(propylene oxide-co-ethylene oxide) gradient is controlled by the polymerization method: determination of reactivity ratios by direct comparison of different copolymerization models. *Polym. Chem.* **2019**, *10*, 2863-2871.
- (10) Mundil, R.; Kanizsová, L.; Toman, P.; Kočková, O.; Uchman, M., Unveiling the reverse reactivity and composition profile of copolymers from synthesized and separated 3-/7-(prop-2-ynyl)oxepan-2-one isomers: implications for precise polymer structure prediction. *Polym. Chem.* **2024**, *15* (17), 1695-1703.
